# Supplementary material
Source: PubMed Central journal article supplement (PMC5100753)
Supplement: supp_pp.16.01132_PP2016-01132DR2_Supplemental_Material_dataset.pdf [file supp_pp.16.01132_PP2016-01132DR2_Supplemental_Material_dataset.pdf]

**Data Set S1. NTLs peptide sequences**

>AT1G32870

MDLSVENGLAPGFRFHPTDEELVYYLKRKIRKKLRLVEAIGETDVYKFDPEELPEKALYKTRDRQWFFSLRDRKHGS  
RSSRATERGYWKATGKDRVIHCDSRPVGEKKTTLVFHRGRAPNGERTNWMHEYTLHKEELKRCGGEDVKDAYVLYKIY  
KKSQSGPKNGEQYGAPFIEEWAEDDDDDVDEPANQLVVSASVDNSLWGKGLNQSELDDNDIEELMSQVRDQSGPTLQ  
QNGVSGLSHVDYTNLENLEEDMYLEINDLMEPEPEPTSVEVMENNWNEDGSGLLNDDDFVGADSYFLDLGVTNPQLD  
FVSGDLKNGFAQSLQVNTSLMTYQANNNQFQQSQGKNQASNWPLRNSYTRQINNGSSWVQELNNDGLTVTRFGEAPGT  
GDSSEFLNPVPSGISTTNEDDPSKDESSKFASSVWTFLESIPAKPAYASENPFVKLNLRMSTSGGRFRFTSKSTGNNVVM  
DSDSAVKRKNSGGNNDKKNKGNKGFCLSIIGALCALFWVIIGTMGGSGRPLLW\*

>AT1G33060

MNQIKNKTLPMTTEQALLSMEALPLGFRFRPTDEELINHYLRKINGRDLEVRVIPEIDVCKWEPWDLPLGLSVIKTDDQE  
WFFFCPRDRKYPGHRNSRATDIGYWKATGKDRTIKSKKMIIGMKTTLVYRGRAPRGERTNWMHEYRATDKELDGTG  
PGQNPYVLCRLFHKPSDSCDPAHCEEIEKVNFTPTTTTRCSPDDTSSEMVQETATSGVHALDRSDDTERCLSDKGNNDVK  
PDVSVINNTSVNHAETSRAKDRNLGKTLVEENPLLRDVPVTLHGPILSEKSYYPGQSSIGFATSHMDSMYSSDFGNCDYGLH  
FQDGASEQDASLTDVLDVEFHNHNESSNDRKDFVLPNMHWPGNTRLLSTEYFPLKDSVAFVDGSAEVSQSQQFVPDIL  
ASRWVSEQNVDSKEAVEILSSTGSSRTLPLHNNVFGQYASSSAAIDPFNYNVNQPEQSSFEQSHVDRNISPSNIFEKARS  
RENQRDLDSVVDQGTAPRRIRLQIEQPLTPVTNKKERDADNYYYEDEVQSAMSKVVEEPPANLSAQGTAQRIRLQTRLR  
KPLITLNNTKRNSNGREGEASHRKCEMQEKEDISSSSSWQKQKSLVQFSSVVIIVAVIVLVEIWKESRDAKCSFLFHQLD  
SFKGMFT\*

>AT1G34180

MVDSSRDSCFKAGKFSAPGFRFHPTDEELVYYLKRKICCKKLRVNAIGVVDVYKVDPELPGNFQHLIDFDSCLSMK  
TGDRQWFFFTPRNRKYPNAARSSRGATGYWKATGKDRVIEYNSRSVGLKKTTLVYRGRAPNGERTDWMHEYTMDEE  
ELGRCKNAKEYYALYKLYKKSAGPKNGEQYGAPFQEEWVDSSEADSVAVPDYPVRYENGPCVDDTKFCNPVKL  
QLEDIEKLLNEIPDAPGVNQRQDFEFVGPQNSAEVIQSTLLNNSSEGEYIDPRTNGMFLPNGQLYNRDSSFQSHLNSFEAT  
SGMAPLLDNEKEEYIEMNDLLIPELGASSTEKSTEFNLHGEFGDVNEYDQLFNDISVFQGTSTDLSCLSNFTNNTSGQRQQ  
LLYEQFYQTPENQLNMYMHPSTTLNQFTDNMWFKDDQAALYVQPPQSSGAFTSQSTGVMPEMNPTMSVNPQYKEG  
QNGGGTRSQFSSALWELLESIPSTPASACEGPLNQTFVRMSSFSRIRFNGTSVTSRKVTVAKKRISNRGFLLSIMGALCAIF  
WVFKATVGVMMGRPLLS\*

>AT1G34190

MADSSPDCFKGGKFSAPGFRFHPTDEELVYYLKRKICRKRRLRVNVIGVVDVYKMDPEELPGQSMKLTGDRQWFYFTP  
RSRKYPNAARSNRGTENGYWKATGKDRVIEYNSRSVGLKKTTLVYRGRAPSGERTDWMHEYTMDEDELGRCKNPQE  
YYALYKLFKKSAGPKNGEQYGAPFQEEWVDDDDNEDVNAIAVAVPEQPVVRYEDARRVDERRLFNPVILQLEDIDELLN  
GIPNAPGVQRCIPQVNSEEELQSTLVNNSAREFLPNGQYQNRPSFSDSLETAEVTSAPLVFEKEDFIEMDDLLIPEFGASS  
TEKAAQFSNHGEFDDFNEFDQLFHDVSMMLDMEPIDQGTANLSSLSDSANYTSDQKQQLLYQQFQDQTPENQLNIMD  
PSTTLNQITSDIWFEDDQAILFDQQSFSGAFASPSSGVMPTDSTNPTMSVNAQGHEIQNGGGTTSQFSSALWALMDSIPSTP  
ASACEGPLNRTFVRMSSFSRMRFNKGANGTPVSTTIKKGIRNRGFLLSIVGALCAIFWVVLVATVRVSGRSLLLKD\*

>AT1G65910.1

MAPVSMPPGFRFHPTDEELVIYYLKRKINGRTIEIIEPIDLYKCEPWLPGKSLLPKDLWFFFSRDRKYPNGSRTNRA  
TKAGYWKATGKDRKVTSHSRMVGTKKTLVYRGRAPHGSRDWMHEYRLEEQECDSKSGIQDAYALCRVFKKSALA  
NKIEEQHHGTTKNKGTNSEQSTSTCLYSDGMYENLENSGYVPSPETGGTLQLGNNSSSDMETIENKWSQFMSHDTSFN  
FPPQSQYGTISYPPSKVDIALECARLQNRMLPPVPLYVEGLTHNEYFGNNVANDTDEMLSKIIALAQASHEPRNSLDSWD  
GGSASGNFHGDFNYSGEKVS CLEANVEAVDMQEHHVNFKEERLVENLRWVGVSSEKELEKSFVEEHSTVIPIEDIWRYHN  
DNQEQEHHQDQGMVDNNNNGDVDDAFTLEFSENEHNENLLDKNDHETTSSSCFEVVKKEVESHGLFVTTRQVTNTFFQ

QIVPSQTVIVYINPTDGNCCSMTSKEEVHVRKKINPRINGVSSTVLGQWRKFAHVIGFIPMLLLMRCVHRGNSNKNRG  
SEGYSRQPTRGDCNNRGTILMMENAVVRRKIWKKKKKEKNMVDEQGFQDSFVLKGLSLAILAVSTISLI\*

>AT2G27300.1

MSKEAEMSIASALFPGFRFSPTDELISYYLRRKIDGDENSVAVIAEVEIYKFEPWDLPEESKLKSENEWFYFCARGRKYP  
HGSQSRRAQLGYWKATGKERSVKSNGVVGTKRNLVHIGRAPRGERTEWIMHEYCIHGAPQDALVVCRLRKNADFR  
ASSTQKMEDGVVQDDGYVQGRGGLEKEDKSYESEHQIPNGDIAESSNVVEDQADTDDDCYAEILNDDIILKDEEALKA  
SQAFRPTNPTHQETISSESSSKRSKCGIKKESTETMNCYALFRIKNVAGTSSWRFPNPFKIKKDDSQRLMKNVLATTVFLA  
ILFSFFWTVLIARN\*

>AT3G10500.1

MGRGSVTS LAPGFRFHPTDEELVRYLKRKICNPKFKDAISVTDVYKSEPWDL PDKSRLKSRDLEWYFFSMLD KKYRN  
GSKTNRATEMGYWKTTGKDREILNGSKVVGMMKTLVYHKGRAPRGERTNWVMHEYRLVDQDLDTG VHQDAFVLCR  
IFQKSGSGPKNGEQYGAPFVEEWEEDDMTFVPDQEDLGSEHDVYVHMDDIDQKSENFVYDAIPIPLNFHIGESSNNV  
ETNYSDSINYIQQTGNYMDSGGYFEQPAESYEKQDKPIIRDGSLQNEGIGCGVQDKHSETLQSSDNIFGTDTSYNDPF  
VESNYLIGEAFDPNSNLLDGLYLETNDLSSTQQDGFDFEDYLTFFDETFDPSQLMGNEVDFFDQEELFQEVETKELEK  
EETSRSKHVVEEKEKDEASCSKQVDADATEFEPDYKYPLLKASHMLGAIPAPANASEFPTKDAAIRLHAAQSSGSHVH  
TAGMITISDSNMGWSYGKNEENLDLILSLGLVQGN TAPEKSGNSSAWAMLIFMCFWVLLLSVSFKVSILVSSR\*

>AT3G44290.1

MAAAPPIEPAVTTTFPGFKFSPTDIELISYYLKRKMDGLERSVEIIEVEIYNFEPWDL PDKSIVKSDSEWFFFCARGK KYPH  
GSQNRRA TKIGYWKATGKERNVKS GSEVIGTKRNLVHIGRAPKGGRT EWMHEYCMIGVSLDALVICRLRRNTEFQGST  
IQKPPQPSLPLDKHVNL RNEAISESIYGWETMVDFYLSSESGQELLSEIAESSQSSQNPQVPSEEDFYADILRDEIVKLD DPA  
VSGNTLINVPRQLTESNTRVLP L PDMVDKMQMSLLQKLP LQNDTGEENNISMSNCFIGIYSIKSINRARWDVVVWLLVMI  
AVLVFYLV\*

>AT3G49530.1

MNQNLHVL SMDSLPVGLRFRPTDEELIRYYLRRKINGHDDDVKAIREIDICKWEPWDL PDFSVIKTKDSEWLYFCPLDRK  
YPSGSRQNRATVAGYWKATGKDRKIKSGKTNIIIGVKRNLVHAGRAPRGTRTNWIIHEYRATEDDLSG TNPGQSPFVICKL  
FKKEELVLGEEDSKSDEVEEPAVSSPTVEVTKSEVSEVIKTEDV KRHDIAESSLVISGDSHSDACDEATTAELVDFKWPPEL  
ESLDFTLFSPLHSQVQSELGSSYNTFPQSSNFSGNNNSNFQIQTYGTNEVD TYISDFLDSILKSPDEDPEKHKYVLQSGF  
DVVAPDQIAQVCQGS AVDMSNDVSVTGIQIKSRQAQPSGYTNDYIAQNGPRRLRLQSNFNGINTKNPELQAIKREAED  
TVGESIKKRCGKLMRSKNVTGFVFKKITSVKCSYGGLFRAAVAVVFLMSVCSLTVDFRASAVS\*

>AT4G35580.2

MGAVSMESLPLGFRFRPTDEELVNHYLRLKINGRHS D V R V I P D I D V C K W E P W D L P A L S V I K T D D P E W F F C P R D R K Y P N G  
HRSNRATDSGYWKATGKDRSIKSKKTLIGMKKTLVYRGRAPK GERTNWIMHEYRPTLKDLDG TSPGQSPYVLCRLFHK  
PDDRNVNGVKSDEAAFTASNKYSPDDTSSDLVQETPSSDAAVEKPSDYSGGCGYAHNSNTADGTMIEAPEENLWLSCDLED  
QKAPLPCMDSIYAGDFSYDEIGFQFQDGTSEPDVSLTELEEVFNPPDFSC EESISRENPAVSPNGIFSSAKMLQSAAPEDA  
FFNDFMAFTDTDAEMAQLQY GSEGGASGWPSDTNSYSDLVQQEQMINHNTENNLTEGRGIKIRARQPQNRQSTGLINQ  
GIAPRRIRLQLQSNSEVKEREEVNEGHTVIPEAKEAAKYSEKSGSLVKPQIKLRARGTIGQVKGERFADDEKFFVVVTGTG  
AEQKETREAMEGGCNGNGCGD GWRDGYMEDTGEFMTHETQRERERESNVV\*

>AT5G04410.1

MGRGSVTS LAPGFRFHPTDEELVRYLKRKVCNPKFKDAISVTDIYKSEPWDL PDKSKL KSRDLEWYFFSMLD KKYSN  
GSKTNRATEKGYWKTTGKDREIRNGSRVVGMMKTLVYHKGRAPRGERTNWVMHEYRLSDEDLK KAGVPQEAYVLCRI  
FQKSGTGPKNGEQYGAPYLEEWEEDGMTYVPAQDAFSEGLALNDDVYVDIDDIDEKPENLVYDAVPIPLPNYCHGESS  
NNVESGNYSDSGNYIQPGNNVVD SGGYFEQPIETFEEDRKPIREGSIQPCSLFP EEQIGCGVQDENVVNLESSNNNVFVAD  
TCYSIDIPIDHNYLPDEPFMDPNNLPLNDGLYLETNDLSCAQQDDFN FEDYLSFFDDEGLTFDSSLLMGPEDFLPNQEALD  
QKPAPKELEKEVAGGKEAVEEKESGEGSSSKQD TDFKDFDSAPKYPFLKKTSHMLGAIPTPSSFASQFQTKDAMRLHAAQ

SSGSVHVVTAGMMRISNMTLAADSGMGWSYDKNGNLNVVLSFGVVQQDDAMTASGSKTGITATRAMLVFMCLWVLLLS  
VSFKIVTMVSAR\*

>AT5G22290.1

MDTKAVGVSKDTAASMEASTVFPGFKFSPTDVELISYYLKRKMDGLERSVEVIPDLEIYNFEPWDLPKSIVKSDSEWFFF  
CARGKKYPHGSQNRRAATKMGYWKATGKERDVKSGSEVIGTKRTL VFHIGRAPKGERTDWIMHEYCVKGVSLDDAMV  
CRVRRNKEYNSGTSQKAPKPNSAEKHAKVQNGATSSGSPSDWNLVDFYLAGESGEKLLAEMAESSENQVDNDEDF  
ADILRDEIINLDEAVMTGNTPNVPTLESASMEIRVPLPLNMIDKQMSLLEERPSQKKKGKDATESLSSCFVGLYSIKSVN  
KARWDVVIIGVVALIAMLFYLE\*

>AT5G24590.2

MKEDMEVLSLASLPVGFRRFPTDEELVRYLRLKINGHDNDVRVIREIDICKWEPWDLPDFSVVKTTDSEWLFFCPLDRK  
YPSGRMNRRATVAGYWKATGKDRKIKSGKTKIIGVKRTL VFYTRAPKGRTRCWIMHEYRATEKDLGDKSGQNPFFVVC  
KLFKKQDIVNGAAEPEESKSCVEPAVSSPTVVDEVEMSEVSPVFPKTEETNPCDVAESSLVIPSECRSGYSVPEVTTTGLD  
DIDWLSFMFEFDPKLFSPHLSQVQSELGSSFNGLQSESELFFKNHNEDYIQTQYGTNDADEYMSKFLDSFLDIPYEPIQY  
EPQNLSSCNKINDESKRGIKIRARRAQAPGCAEQFVMQGDASRRRLQVNLNSHKSETDSTQLQFIKKEVKDTTTTETMTK  
GCGNFTRSKSRTSFIFKIAAMGCSYRGLFRVGVVAVVCVMSVCSLVA\*

>Bradi1g52480.2

MGKAVAMSAAAEVLVGFRRFPTDEELVRHYLKGKIAGHRHPDLLVIPDVLSSCEPWDLPSKSVIKSDDPEWFFFARRD  
RPKYPGKSPRSNRSTAAGYWKATGKDRIRSSSSNNKTLIGIKTLVFHRGRAPRGLRTPWIIHEYRAAEPFQSGRNGSF  
VLYRLFNKQDGETPSKSSRSDLQNGGDDQDKATTSMTSDL SLLTATKPTTTDHSMTNLITAVDGDVSHEDAFDLVLTQL  
PDLHADQRYDGFNISPMPRYTDHPFVGNMGDQDFSAYFDSIAEQNIQDMLLHPDYAEMDKHPAGNTESDPTALVTST  
ANSNSMAPLEDWREDDYDQRADDDATRCLSALSTLQSDTSGHNHETRPQTNIMYGGANLASQCYSQCQLPLALDPQ  
TESSHISGDLWNPYAQHLLDSMLEPSSSDMINSEASNGQGGWAVPPSMQQSEVQDFIDLQGGTAARRVRLVCGVQRAPAS  
QLIITPHLKSEDEAGSCCSTGSSSNHDEDYANAGSRTMAGDMMHIEDTGHIPTQVASLVKVTDKLQHL SLEDMPHEIKM  
PRRHGAGLTQRLKHDSAQSVHQDLLQNSNHVPGESSSETTGRSTGSVVRLWLALLVMAPLLVLVGVWSSLNYWQM\*

>Bradi1g77217

MAPVSLPPGFRFHPTDEELIYYLKRKINGRQIELEIPEVDLYKCEPWDLPEKSFLPSKDLEWYFFSPRDRKYPNGSRTNRA  
TKAGYWKATGKDRKVNQRRVAVGMKTLVYRGRAPHGSRDWMHEYRLDECECEIDNGLQDAYALCRIFKKTAPG  
PKIIEHYGAVQYHAEQPQWGTSCSVERSPTLDVSCDGRGGADEFETSSSFPTEAAPMASSSMHGGCGFGMPMMSGGAP  
QEDGRWMQFLSEDAFNATNPFMNPASANFSCFPKVDVALECARLQYRLDLPPLLEVEDFPQDVSLDTKTGILRSNPNE  
VDILQEFLSVASASQELINGSSSYTETWLGAGTSSAGNHYMNELSSLDL GATKAKEEADNFYQLCSIGASMTSRDEPA  
RLVEISDMEEFKKEKRVENLRGVKLVNNDLGEIVVEGDENNQTEVITHYPIKDAADTSGEAGHLLTDATDAVGIDDTAPI  
FSQSQPDDFAIIAAAGFHDEEGENASLDLYDKQVVDVQHGLFVSRVGAETFFHRVEPPNKVSFHLNPAANSSVGVGKAI  
SEKIHCSYHYLPVTSKVSNSKVSIFSKV KALVRDKFMARKPSLSLHRRRSEETATVSELLQIVSLLLAAPSSNKEVTEQG  
DLVARKKAKEPVMKPPVWGCDDGCSNPWLPKRNNNKGISGMFLSGKWAFLLSALLAIRAPAGSCN\*

>Bradi2g09530.1

METLRNMTLPPGFGFHPKDTLVSHYLKRKILGQRIEYDIIPEVDIYKHEPWDLPAKCNVPTQDNKWHFFAARDRKYPNG  
ARSNRATVAGYWKSTGKDRAIKVDKRTVGTKTLVFHEGRPPTGRRTEWIMHEYIDENECHACPDMKDAFVLCVTK  
RVDWTSSENGNEVGNNDPQQSNVAATS AVSAEQPDAAAESVIGGELPNDLATSAITAQTTPDGDDEIQGWLEGMIDFSF  
NSAVDPVSAAGSLDEQNAESSNRGAMAPKVEPDYASPNQFVDDSDYLLPDDIYNMLCPGSDDFMPWHTEQAALAF  
DQYTSIMGVDPFTLPSNFAEGTQNEELQLPLEINEPNLSNEAADNGVIIRTRNGKTPAESIPPYRSNRTRLQHSINRMVSSS  
ESINETMKFVDNNGRDLMTNVEHKKKHVRDVTTRQRDAGKSNRNQNNQGFRRGVRKSVWGCSAAGLNILVALCMV  
GVAVAILHHGCHRTGISL\*

>Bradi3g12470

MTLPSSSSSAPAAAAAAAAPDDPTSLAPGFRFHPTDEELVSYLKRKVLGRPLKVDAIAEVDLYKLEPWDLPARSRLR

SRDSQWYFFSRLDRKHANRARTNRATAGGYWKTGKREVRHGPVAGMKKTLVFHSGRAPKGERTNWMHEYRLE  
GDGAAGIPQDSFVVCRIQKAGPGPQNGAQYGAPFVEEEDDADDVGLLPLEGDADVAEREAPGAMEKGYLQMSDLIQ  
DCGGQENGGVALPVSDSSNNHSEVAEGNSGDILNDPNLGSNFLQHVDPGEQNSLMLNGNMLSANANGDLLNSSSPS  
NAFMELKDLGYPLGNDSSGSDWRTPHSFEHVNGANNEAPPITGEHIFQPDELEQLLQSLQDDSPGSGTITDVPQSSLTNSV  
QPEDDFLMFHDAPFDSTMFNDGFGQSAGFLGSPVTNLSGIGMVDDGMPYDAIDDNLFNDDMMCSGQSQSAGSGSHLFNG  
PVLSQEVNNTTYTYSPTQKQVLEPNFVVGAPSSARLPEAGSQLNCNLPDAPARRGAIVNHFKVLDSTGPNFAFSEFPNL  
RKS LAPISGAHPNTISVSTEVISMEKGS LTVASRQDKWSFQKGEDMELLFSTGSEPGRMHCGGCNTITAVLRS GFCLFFLS  
AIMLLVSCEVGLCIYK\*

>Bradi3g16480

MTVMELKTLPLGFRFHPTDEELVRHYLKGKITGQINAEVEVIPEIDVCKCEPWDLDPKSLIRSEDPEWFFFAPKDRKYPNG  
SRSNRATEAGYWKATGKDRIKSKGEKKQHMHGKTLVFHRGRAPKGERTGWIMHEYRTTEPEFESGEQGGYVLYRL  
FQKQVEKSERSSPDEMDSGYSPTPSRSTPDNMEANEEAITLLNKESPESGVQGCPIPLPGTVETPAAPITRWLADRTDNLV  
THDANILRTPFHGHVDEIPKTPGLVQPIDPQKKNVDSEEFLLFAAPMLPHEGNDLFCNPSLQGHSDFFGGSMAPGDLVEKF  
LNEAIADPEEHSSTASKVQYDSDNGIMLPELENNWPMQGEMLDDPYWFENINFCPDDTTPQLSGYENTPLLPFIGANPDE  
LSMDS DHESM QDLFNTMEDSNEKMGWNNGFNFPIHQQLQSTMHPNHLVSQQGCAQRRLRLQDLSAVNIEGEESSMT  
KDEDEVSHIVTSEYMGESVESTADGDDGDSTGVTIMSRHPAPSTNEPSDGDGDSTGVTIMSRPAPTTNEPSDGDGDGDS  
TGVTIMSRCPAPSTNEPSDGDGDSTGVSIISSRRPAPSTDEPSDGDDAESTGVLIMSRGALSSDVPDRDVAESAGITVLSQ  
CPALSSSSDSSITQGTAGRRRLQLNLNAGPCSSIDGSSCMIDEKENEHKGMR AENEGNMDTSFCDDANFVGNNADE  
QDNIPEHDAARVPPEANSVTRLRKTAEKSGNENKQELGVHPHVRAPRKGGFPAIIPVLSVALLVLSVGIYGLA\*

>Bradi3g56080

MSPSLPDHSPEVPLAPGFRFHPTDEELVSYLRRRVLGRRLRIDAI AEVDLYRLEPWDLPSLSRIRSRDSQWYFFARLDRKV  
AGAGAGGRGGPGNRTNRATPRGYWKTGKREVRHGRKAVGMKTLVFHAGRAPKGDRTNWMHEYRLLDNDGPQD  
LHVVCRIQKLGTPQNGAQYGAPYMEEEWEEEDDAIENAPASGASTAMAAITDTASPENVEEDENMYSKTNELVQTQE  
VLNPPETAPILAQGLEETDEGSYGDGVISLEELQEPVSNVSVENIGEP EEKTAIDDFSLADLSGYPSQDDGYVALNGPIIC  
RDPSNGDHAYWPLRTYGHQNHANGTLNAEEFFDTGNDTNTYSVEQQICPSDQONLYLQTNGLPAPQQVDDNMAFYDAS  
STHKWVDGKDDFANANELLYQ PENEPLFDVDDL MAYFDATEDDFKFDMLGSVEGPNWPLPENMLDFAPK DENMDGFTF  
DGISKTSANVQYVASSSGSHENLYLDTAVADIPMDDSADKSFGRFASVLSIPAPPAMASEFPATGKSVASLSAVNGPSSI  
HVTAGIVQLGGLTFSGSEHWPLQKNGDFSLLSFTVESDVSTKSVGFDEPATQLSTVPMVLRGGLYLFFVSAMILMFSYK  
VGSCIYSR\*

>Bradi4g34022

MENPPRWPFGFRFSPTDEELVLYFLKRRIASGRPTPIADVDVYKSHPSHLPERSALRTGDKQWFFCSRLDRKYPNGSRA  
SRTTAEGYWKATGKDRTICNGGRAVGNKKTLYHHGRAPRGDRTDWVMHEYTILGDALPPTAQREGYALYKLFQKSG  
VGPKNGEQYGAPFREEDWLDDEGELQLPVEAADPIPTVASDRAGTVDEQIGDLEALLQTGNDQINIGPPSDLSTPVPS  
QVLFQHQGSQGWPTAEDNRSEVADATTSSRAMLVADNTCTELPFGDLEGLLMEISDEQRS AELFSEFSNPVQLQLQHDD  
QEAWL NADMEEVSVADYTTSSGVVETAECTGIELPYGDLEGLLQIENDQENIEPLTDFSLPVSHHECHQVGVGDLQRCH  
GAMFSSVDPSSAVQGSTNFEPQLEPSNQIAQSALTCMPLSWEANCTEETSVMQSVSGLASYDGQDSHEEFLEINDFDSED  
IGQSMNCTTTEHLISASSGMFDSLEYS DASMFLPGSFDTAGVVTENQYVDFGDSGYKSGVQYTAELWAHNQVALNMQN  
HMKHNHVGLSSHASGTANNIVNEEPLNRSPNTS QSWFNALSTLLDAVPASPALAAESNVLNRTLQRISSEFRSEQVSNES  
APVIHVRAAVTMRAAAIQSHILGRAPPVAVPLHTRPRRAGGGGALLRRQGSQRLSDLLLPLPTAVPCRARSPSSSSSS  
ADSGTGEGADELLEDLLQKHGEVVYSAAGGGGAPANEADEDAECLSLAVSLAKVASEVKAADIRVLFVKPIVYWTEFFII  
LTAFSNAQIEAISSKMRDIGEQFSRVASGDTKPNSWTLLDFGDV VVHIFLPPQREFYNLEEFYGNATPIELPFETQLR

>Glyma.02G222300

MGAVVECYQPRTAVLSLNTLPLGFRFRPTDEELIDYLRSKINGNGDDVWVIREIDVCKWEPWDLPLSVVRNKDPEWF  
FFCPQDRKYPNGHRLNRATSHGYWKATGKDRRIKSGSTLIGMKKTLVFYTGAPKGRKRTNWMHEYRPTLKELDGTNP

GQNPYVLCRLFKKQDESLEASNGDDVDRTASTPMTANYSPDEIQSDSALVPASSSQVTEDDKPLPVISENSEEAISNIITPGE  
IHSDGCNAPDAQDQIVPEVAEEDQPLNVDIFYDPTNLPLDDKLFSPVHAHFPTDFYYQANNQSELYGTNENISEFFDSV  
NWDAFSHDTSLLDSSFLINNNDNGSGSDSDVEMTNMPLQLALHNYPKAEVEQKSNVGLFQNNFQMALESNDSTMGMQV  
HNMVNYCEQPRNFDAFVSADTGIRIRTRPGRNEQPNMDTMVQSQGIAPRRIRLGVVRRPLGSQDGSCACAPEDHNSKTII  
TAEKKASESENHAADGSSTVSDMSSTVTDVDEPEEASPESTDLRNISEKHVATAESVAGSKVLLVNRVHYTSKVSSNRA  
TWSNVLAVSAAVLVSAILLVNIWAYVRS\*

>Glyma.02G240500

MAPVLPPGFRFHPTDEELVAYYLKRKINGRKEIEIPEVDLYKCEPWLPGKSLPLGKDLWEYFYSPRDRKYPNGSRTNR  
ATKSGYWKATGKDRKVNQARAVGMKKTLYYRGRAPHGSRNTNVMHEYRLDERECETNSGLQDSYALCRVVKKTAV  
IPPKVGEHHYVNPANQITSDHSSIEIYPEGRGEDLDSYNYFMPVDACSPHNMGNESLTINSIMTRDHEKWSHFSSQ  
DPLFSLPTSSFSKFGAIAYPPSKVDIALEYARMQHRFVLPPEVDDFPQVGISELKMTQASGSMQGSRTETDILQEILSVAQV  
SQELINQSNYSQEWGGNNDNYAPREDDFTFMVGTNYNHSNHGMSSMRYADKTWEDANTRTIEIGDVDEEFAERMVEN  
LRWVGMSSDLQKMEEQKVIPIEDISSFTNEVQESEQHSNKEHNDTEINDFSLGFINDNDGNENFIEDGNIDDYSSSPS  
FEVVEEIKVNHGMLVSTHQVVFETFFHQIVPSQTVQVHLINSVMAHNNHYVENAEAMLMMENKGSLLRNKVAYVMGK  
LIKPSKTIASAIVVFALVLMHCVYLKEEVEIWNESNNEVNWVFGVKSHEKELSAVLKKGIFLTISLAFCTMWASQNMVV  
NP\*

>Glyma.04G226700

MGSVDCYPSRVDDAAVVSLSLPLGFRFRPTDEELVNYLQKINGNGREVWVIREIDVCKWEPWDMPLSVVQTKDPE  
WFFFCPQDRKYPNGHRLNRATNNGYWKATGKDRKIKSGTILIGMKTLYFYTGAPKGNRTNVMHEYRPTLKELDGT  
NPGQNPYVLCRLFKKHDESLEVSHCDEAEPTASTPVAAYSTEEIQSDLAVVAGSPSQVTEDDKHQSMIPAHSEEAISNVV  
TPVDRRTDGYDACDAQNQEILPTAEFQPLNFDIYDPRSELLDGKLFSPVLAHIQPEFHYQANIESDGRYGLQYGTNETN  
MSDFLNSVVNWDQVPFEDPNCQQSYPLFNVKDNILNSDLSELANMTCMQAGYAEGAIDGRIPLITSEFCSTTGIPVD  
CVGDEQKSNVGLFQNSQRAFTDVNMGQVYVNVDDYEQRICSAVASGNTGIIRRHREVRNEQLSINSTQGTARRRIRLS  
MATHGSNKTVKESCAQEELYAKPVIIVGEGKSENHASDESATLTNDGNELQKTPESTGKRKISQVTKAGSTLGLKDLF  
LLRRVPHISKASSNRTKCSSVFVLSAFVMVSLVVFVTDIWDGKLF\*

>Glyma.06G138100

MGSVDCYPSRTDDAAVVSLSLPLGFRFRPTDEELVNYLQKINGNGRQVWVIREIDVCKWEPWDMPLSVVQTKDPE  
WFFFCPQDRKYPNGHRLNRATNNGYWKATGKDRRIKSGKDLIGMKTLYFYTGAPKGNRTNVMHEYRPTLKELDGT  
TNPQNPYVLCRLFKKHDESLEVSHCDEAEQTASTPVAYSTEEIQSDLAVVAGSPSQVTEDDKHQAMIPAHSEEAISNVV  
PVVCRSDRYDACHAPNQIVLPTAEFQPLNYDPRNELDDKLFSPVLAHIQPEFHYQANIESDDWYGLQYGTNETNMSD  
FLNSVVNWDQVSFEDLNCQQSYPLFNVKDSVLSDDLSELAIMTCMHAGSAEGPNNGRKLPLVITSEFRSTTGIPVDCGG  
DEQKSNVGLFQNSQRAFTDVNIGQVYVNVDDYEQRGIYSAVASGNTGIIRRHREVQNEQLSSNSTQGTARRRIRLSMAT  
HGSNKMKVKSQCAQEELNLSVIAMEEKASESHISESSTLTNDGNELPKTSKSSGKRKISRQATKAGSTLGLKDFLLRR  
VPYISKASSNRAKCSSVFVVSFAFVMVTLVVFVTDIWDGKLF\*

>Glyma.07G047900

MENNIISICDHMPVGFRRPTDEELVNYLKHKLADDFVHIPEIDLCKVEPVDVPERSVIKSDDPEWFFFSVDYKYLK  
SKRFNRITKRGYKTTGNDNRNVKIPGTSNVIGTKTLVFHEGRGPRGVKTNVVIHEYHAVTSHESQRAFLCRLMKKAE  
KKNEGGIEAPTDEGEPSVHLFSDYGNQVDIIPGVDMEEIFQAVDRAEKFSPPVQRSQTGIGLEDFANSPLFNAHFGSENI  
NMQTSLEVTDDEELVNSFWVDDEEFVINEERRHCFVNSSTQPKSFRRVYNESSEIDAEVSNLNEHISADEYPALKMFOSS  
YDVRGGTSRLASNHKANKEKESIPDDFWAVETSSCDSTADEPIEISSPSTPTRMKNQCHLRPDKFILQRTVAGRPTQK  
KVSNNAVSHVEVRKELLTVKSEKDQKNAQNASLRGNFKNKSQQSSDVNNNGSFFYMETASNRSLFPRSVYLVNVIGILL  
LIVISWDVLS\*

>Glyma.10G197600

MARMGPGFRFHPTDEELVVFYLRKMTGNLSRYDHIADVYKLEPWLPLSLSKLTKDLEWYFFSALDRKYNGYRT

NRATERGYWNQTGIEHFVHADLFMYLSSFMRYVVLALELDWSGIIDSDTLPSLNFHYGECSSHAEYSKVFIKDQEPLADT  
FEISCPENVWPLDMTGQHGVTNSGEDGDSGELSNIGNFDLSSNNMNL DLYWDANENLPMDDDGFLYNDIAIGNGDNP  
TEADLSANAMLDEYAAALADDDIYKYISFDSPQIQESENFI PNQGSPTQQNVEGETADRAVVSNEGSSVQNTQEAMLGIST  
NPLVKQAYGWLASIPAAPAHAMEFPAKEIALGLHPVAQSSHPAHITTTGMISITDITFRDNAMDWTMGKNGGFSTVISTGFS  
QSDVNSAALMPVSGKTAFVLSHGWI FLTGFSVLILSL SCKIGSIIAYR\*

>Glyma.10G219600

MGEASGAGSADCFSQMMSSMPGFRFHPTDEELVMYYLKRKICGKRLKLDVIRETDVYKWDPEDLPGQSILKTGDRQWF  
FFCHDRKYPNGGRSNRATR RGYWKATGKDRNVICNSRSVGVKTLV FYAGRAPSGERTDWMHEYTLDEEELKRCLG  
VKDY YALYKVYKKS GPGPKNGEQY GAFNEEQWADDDIVDFNINSADQEAPNDVDNGNVLQPLLDDEIDNIIRGILDEL  
VLDQQHVNGYPDFPQV VSEETQSTVVDQFSEAVMFPEPVRITQPSNQFFDAQPSDFNQPV TSHLHVSEASEVTSASSIKA  
KELDFNEDGFL EINDLIDTEPILANMENPVEYQQFEDGLSELDFQDAQMFLRDLGPIIHETDSHAYTNAFVSSNIESQSYQ  
LLPNPEDANQTVGEFWMHGERNTPSASEGFVDSFSLSSPGVVYESVGFPTTEGNNNQSSSTVEDVATSSFSALWAFVESIPT  
TPASAAESALVNRALNRMSSFSRLKIKHTNIAAAGKDTATMKRAGRKGLPFLFFPIIALCAFCWV FVGNLRLLRGCVSP\*

>Glyma.11G212400

MNMAPVSLPPGFRFHPTDEELVSYLKRKINGRKIELEIPEVDLYKCEP WDLPGKSLLPKGDLEWYFFSPRDRKYPNGSR  
TNRATKSGYWKATGKDRKVN SQSRAIGMKTLYYRGRAPHGCR TGWVMHEYRLDETQCETNSGLQDAYALCRVFKK  
TAVIPPKVGDQHYV NVLSHANQMTSDQSSIDIELYSEGRGEVLESSNYLMPWDTCPSPNINIGSSLNININGGTRKDN  
NIGTWSHFLSSEDLLNLPSTSSFPNYGSMSPKVDIALE CARMQHRFTMPPLEVQQDFPQV GISELKMAQASASNM  
CGSRNNETDILQEILSVAHASQELINQSNYSSSQA FGANENNYAPPHESDFTFMVGTNYNHVNDMNTMGFVDNIAWEDP  
NARSIEIGDLDDGFKTERMVENLRVWGMSSKNMEKGFMEEQKIVPIEHISNFQANREENEVQV VSEQHNSNKLNDTDD  
DFSMGFINTDDPNENFIDEGNIDYSNSTNFVVEETK VSHGMFVSTRQVADTFFHQIAPSQT VVKVQLNPVLAENQSIENAV  
VMVNQGH SFFRKFRA YVMGKLIKPSNTIASALV FIFALLVHC VCLKEQVGEDLKPDPKCFDGANTMKKMRQLPAENNI  
WNEQENFWSVGIKCGKGFVVLK KIGIFLTIS\*

>Glyma.12G186900

MEGVSREAQMSIAASSMFPGRFCPTDEELISYYLRKKMDGHQESVQVISEVELCKYEPWDLPAKSF IQSDNEWFFFSPR  
RKYPKGSQSKRATEGYWKATGKERNVKS GSNVIGTKRTL VFHLGRAPKGERTEWIMHEYCINEKSQDSL VICRLKKNTE  
FRLGDSSNRASSQRHPVGCSSKRDS CSYGPSMEQIDS VSEPNQRPVSEATLAVSSGQPKERYEEDCYAEILKDDI IKLDES  
SISVEGHTRPQDP IQMHPS PQGTSQRRIRLRV GNSKHSPAVRFPCTMHSSKSTFFARITISLVVFPFFVFTLT VLYFLSLVGG  
NKQKVERERNIELQFCSRVTLSIAGKESPIFQHCVTRFVPNSVHNLLFPLSPNLPLGTRRYLSIMNLGLPRSHPSFEWKQQ  
LVADVDSNPSVSQKQH QISKAGETVKEIILVQEKNIRRLNELVRHLQEQLQQCRGRNGTINGTVSPLAERILELERQQILE  
D\*

>Glyma.13G314600

MMEGVSREAQMSIAASSMFPGRFCPTDEELISYYLRKKLEGHEESVQVISEVELCKYEPWDLPAKSF IQSDNEWFFFSPR  
GRKYPNGSQSKRATEGYWKATGKERNVKS GSNVIGTKRTL VFHLGRAPKGERTEWIMHEYCINDKSQESL VICRLKRN  
TFRLSDASNRASSQRHPVNSHESGCAISGGGIDQRDACEQDKEVGCSSKRDS SSSYGSPSMEQIDS VSESNQRPVNEATFT  
ESSGQPKEGYEEDCYAEILKDDI IKLDESSVLVESHTRPQDPTQM QPAPQGTARRRIRLRV GNSKHSRAVVRFPSTMHSSKN  
TFFARTNSLVLAFFVFTLMVLYFLSLVRGQKQDKYCGEFSGVNHD\*

>Glyma.14G189300

MGAVVECYPPPRTA VLSLNTLPLGFRFRPTDEELIDYYLRSKINGNSDDV VVIREIDVCKWEPWDL PDL SVVRNKDPEWF  
FFCPQDRKYPNGHRLNRATNHGYWKATGKDRKIKSGSTLIGMKKTLV FYTGRAPKGRRTNWMHEYRPTLKELEGTNP  
GQNPYVLCRLFKKQDESLEASNGDDVERTASTPTTANYCPDEIQSDSALVPASSQVTEDDKLPVISENSEEAISNIITPGDI  
HSDECDAPDAQYQIVEPVAEEDQLLSVDIFYDPTNQQLDDKLFSPVHAHFPADFYQANNQSELQYGTSENISEFFDSVV  
NWDSFSYATSSLDLGS SFLNPKDNGSGSDS VEMANMLHLQALHDYPKAEVEEFNVGLFQNNPQMAFSNDGPMGQVH  
NVANYCEQPRNFDAFVNGDTGIRIRTRHGRNEQPNMNMIIQSQGIAPRRIRLGVVRRPLGSQETAKDGSCACAPEDHNS

KTIISAEEKKASENHAADESSTVDESSTVTDDSDPEEASPKSTDPKISQQHVATAESISGSKDLLVSRRCYTSKVVSSNCA  
MWSYVLAVSATVLVSAILLVNIWAYVRS\*

>Glyma.14G210000

MAPVLPFGFRFHPTDEELVAYYLKRRKINGRKIELEIIEVDLYKCEPWDLPKSLLPKGDLEWYFFSPRDRKYPNGSRTNR  
ATKSGYWKATGKDRKVNSQARAVGMKKTLYYRGRAPHGSRTNWVMHEYRLDERECETNSGLQDAYALCRVVKKTAV  
IPPKVGGHYVNVPNANKITSDQSSSIELYSEGRHEDLDSSNYLMSMDICSPCNMGNDQTSLTINSGMTRDLEKWSHFSSQD  
PLFSLPTSSSFSNFGAIAYPPSKVDIALECARMQHRFVMPPLEVDDFPQVGVSELKMAQASGSMQGSRTETDILQEILSVA  
QVSQELINQSSYSQDWGGNDNYAPREDDFTFMVGTNYNHSNEMSSMRYVDKTWEDAINTRTIEIGDVDEEFKEERMVE  
NLRWVGMSSSELEKMQEQKIVPIEDISSFQTNREENEVQESEQQNNKEHNDTEINDFSLGFINDDDPNKNFIEDGNMDDY  
SSSPSFEVVEEIKVNHGMLVSTRQVVETFFHQIVPSQTVQVHLINSVMAHNHYVENAEAMLIMENQGSLLRNKVKAYV  
MGKLIKPSKTIASAIVFIFAVLMHCVYVYKKEVEIWNESNNEVWFVGVKSHDEKGLSAILKKIGIFLTISLALCTMWANQN  
MIVNP\*

>Glyma.16G016400

MENIISICDHMPVGFRRPTDEELVDYLLKHKLLADDFPVHIIPEIDLCKVEPVDVPGRSVIKSDDPEWFFFPVDYKYLKS  
KRFNRRTTKRGFWKATGNDRKIRIPGTSNVIGTKKTLVFHQGRVPRGAKTNWVIHEYHAVTSHESQRAFLCRLMKKAEK  
KNEGGIEAPSFDEGEPSIHMVSDYGNPARAEGIASVDIIPGVDMEIFRAVDQAEKFSPPVQSQPTGIGLEDFFPNPLFNAR  
FGSENINMQTSLEVTDDDEFIP\*

>Glyma.18G043900

MNMAPVSLPFGFRFHPTDEELVSYLLKRRKINGRKIELEIIEVDLYKCEPWDLPKSLLPKGDLEWYFFSPRDRKYPNGSR  
TNRATKSGYWKATGKDRKVNSSESRAIGMKKTLYYRGRAPHGCRGTGWVMHEYRLDETQCETNSGLQDAYALCRVCKK  
TAVIPPKVGDQHYVNVPSHVNQITSDQSSSIDIEIYSEGRGEVLESSNYLMPWDTCPSPNINIGSALNININGGTRDNNGTW  
SHFLAEDLPNLPTSASSFPNYGSMSYPPSKVDIALECARMQHRFTMPPLEVQDFPQVGISELKMAQASGSNMCSSSRNNE  
TDILQEILSVAHASHELINQSNYSSSHQALGANENNYAAPHESDFTFMVGNVNRVNDMNTMGFVVDKAWEDPNARSIEIG  
DLDDGFKTERMVENLRWVGMSSKNMEKGFMEEQKIVPIEHISNFQTNREENEVQVGSQQHNNKELNDTDIDDFSMGFI  
NGDDHNENFIDEGNINYSNSTNFEVVEETKVSHGMFVSTRQVADTFHQIAPSQTVKVLNPLMAEDQSIENAVMVNQG  
PPFFRKFAYVMGKLTSSNTIASALVFLFALLMHCVFLKEQVEDLKSDFKCFDANSKIMRQPAENIIVNEQENFW  
SVGIKCGKGFVVLKIGIFLTISLALCTMWANHVIVDS\*

>Glyma.20G172100

MGEASGAGSADCFSQMMSSMPGFRFHPTDEELVYLLKRRKICGKRLKLDVIHETDVYKWDPEDLPQGSILKTGDRQWF  
FFCHDRDRKYPNGGRSNRATTRRGYWKATGKDRNVICNSRSVGVKKTLYVYAGRAPSGETDWMHEYTLDEEELKRCQG  
VKDYALYKVKYKSGPGPKNGEQYGAPFNEEEWADDDIVDFNINSADQEAPNDVADNVNVPFLDDEINNIIEILDDE  
LVLDQQHVNGYPDFPQVVEETQSTVVDQFSEVMLPEPVRISHPSCQFFDAQPSDFNRPVTSHLHVSETSEVTSASNIK  
TKELDFNEDGFLEINDLIDTEPTLSNVENSVEYQHFEDGLSELDFQDAQMFLRDLGPIIHE TDSHAYTNALVSSNIECQSY  
QLLPNPEDANQTVGEFWMHGESNQLSSPGVVYESVGFTEGNNNQSSSTVEDVATSSLSALWAFVESIPTTPASAAESALV  
NRALNRMSSFSRLKIKHTNIAASGKDTGTMKRAGRKGLPFLFFSILIALCAFCWVFGNLRLLVGRSISP\*

>Glyma.20G192300

MARMGPGFRFHPTDEELVVFYLLKRRKMTGNLSRYDHIAVVDVYKLEPWDLPPLSKLKTGDLEWYFFSALDRKYNGSRT  
NRATDRGYWKTGKDRPVTHGDRTVGMKKTLYVHSGRAPHGRRTNWVMHEYKMLDEELARAGTVPDVVFVCRIFEKS  
GSGPKNGAKYGAPLDEKEWDVEDEQEEEEENEQKDVAPLLVPHNAVAPPPLSVVADNAEAHPPLTATVDNKYMVAPP  
PSFQANFDDEVFNAGAYVETNDLDMELNWNNDIIGSDTFPSLNFHHGECSSHAEYSKVFIKDQEPSAGTFGISRPENDWPLD  
MTEQHGVDTNSVNNRDNDELINIGNHLNFNDASNDMNLDFWDANENLPTDGSFLEYNDIAIGNRSRSTEADPPANDIL  
DEYLTLPDDDIYKYISFDSPIQIASENFIPNQSPFTRQNVGETADKAVVSNHNSESQTRNEASSVQNTHEAKFAPGSTNP  
LVKQAYGWLAGIPAAPAHAMEFPAKEIALGLHPVAQSSHPAHITGMISITDITLRGNAMDWTMGKNGGFSTVISTGFCQP  
DVNSDALIPVSGKTAFLVSHGWIFLTGFSVLILSLCKIGSIMYTGK\*

>LOC\_Os02g57650

MSQSPDSSSAAVPLAPGFRFHPTDEELVSYLRRRILGRRLRIDAIAEVDLYRLEPWDLPSLSRIRSRDAQWYFFARLDR  
KVTGAGAGRRGGGPNRNRATPRGYWKTGKDRDVBHHRGKLVGMKKTLVFHSGRAPKQRTNWMHEYRLLDADGT  
QDLHVVCRIQKNGSGPQNGAQYGAPYLEEDWEEEDDAIENMPASGAFAMAAVTDTADESTEEDGNFSLKTNDEPLQT  
QEYQPEITPVKAQGSNEETNGGGYSDFSLDEILQEPENVCKNEEQNAIDDKFTIAELSGYPRQDDGYVGENGPVNWID  
PSNGDNTNWPLRAYSTQNHVNGTSLADGFFDTVNGTNSYSGPSDNQNLYLQDDGLTSSHQVGDNMPFYDASSNHKWV  
DGKDDYLNLDLPPAENQPLFDAGDDLMAYFDATEDDFKFDIMGTEDSNSQLPDMNSNFVQKDDNNNKFTLDGISNTA  
LYGASSSGSHGNMYPDTAVPDMDDTVDKSFGKRLASMLGSIPAPPAMASEFPSTGKSVVPLSAVNPSSSIRVTAIIQL  
GGITFTGSTEHLQKNGDFNLLLSTVEGDVSTKSIGFEPDTQMSTTPMVLRSGLMYLFFVSAMILMLSYKVGLCIYSR\*

>LOC\_Os03g02800

MAPVSLPPGFRFHPTDEELIYYLKRKINGRQIELEIPEVDLYKCEPWDLPEKSFLPSKDLEWYFFSPDRKYPNGSRTNRA  
TKAGYWKATGKDRKVNQRRRAVGMKKTLYYRGRAPHGSRDWMHEYRLDERECETDTGLQDAYALCRVFKKTAP  
GPKIEHYGVVHHHVEQPQWMTSSIDRSPTLDVSCDGRGDDFESSFSFPTETPMDSMHGGFGMQMSAPHEDGKWMQFL  
SEDAFNATNPFLTPVNSANFCLPSKVDVALECARLQHRLLTLPLEVEDFPQDVSLDTKIGILRSNPNEVDILQEFSLVATAS  
QELINGSTSSYPMWLGASTSSASYVNELSSLVEMGGVGTSNHHESARLQVEIADMEVFKDEKKRVENLRGVKLVNNDL  
GEIVVEGDESNPTEDIQAQYPIKVTADNSGEAGHRMTDPTDVGIDTAPIFSQSQPDDFAAGFDDVNPNASFDLYEKVDVN  
HRLFVSRVAAAKTFFHRIEPSKKVSFHSNPAATAVSKATEKFHPVTTKVSGRVSIFSKFKALIRDKFLMMRPSHSYQRLGS  
KETTVELLQIVSLLLAPKQINGCPTQELVKKKAKEVMKPGWGREGSKLWLPKSKGKISSMFLSGKWTFLLTALAIS  
TPAECDH\*

>LOC\_Os08g06140

MTVMELKKLPLGFRFHPTDEELVRHYLKGKITGQIRSEADVIPEIDVCKCEPWDLPKSLIRSDDEPEWFFAPKDRKYPNG  
SRSNRATEAGYWKATGKDRVIRSKGDKKKQVIGMKTLYFHRGRAPKGERGTGWIMHEYRTTEPEFESGEQGGYVLYRL  
FRKQEEKIERPSPDEVDRSGYSPTPSRSTPDNMEPIEDGNTPLNRESPEALHESPIDLPALTEAQAAPITRWLADRTDNATT  
NEVNISHMPHHGLDGGAKQASPSAGAFPQLIGSQQNIHDNDELATVSAPMLPHEDFNNFPLGAINFDGNMNPDPVEEF  
LNQTIADPEHSSSTSKAQYDSDTGIIPTFENHGMVQGEFMDLSDLENLDFWPDDRNPQLSALYEDTPLLDPYDSTDQD  
VLSMDSGAESLQDLFNSMDDSNARNVWGNPFLQGTGFPMSPWLPNSAFPNQGTANRRMLQLSESLSPDFDVSM  
RDECEDEEPGIVVTSKYVNEAPEESTAEDKMPDGDAAEPTGITILRRRHAPTASSFSDGDDAESTGITILRQHAPNASLL  
SDGDDAESTGITILRRRQAPTASSASSFTQQGAQVQRVRLQSNLDAAPCSSVDGSSSCIINEGESERTMEKPEIEENAGSTLA  
EGGTCHEDDQKEHDASAANAKSVLRLRKAEGSDKENKQEEEEGLASHVRAPGNKRGFPSYIIVLVLVALVLLISLGI  
YGVW\*

>LOC\_Os08g44820

MSHPSSSSSAPPAAAEATSLAPGFRFHPTDEELVSYLKRKVHGRPLKVDAIAEVDLYKVEPWDLPARSRLRSRDSQWYF  
FSRLDRKHANRARTNRATAGGYWKTGKDREVRNGPTTVGMKKTLYFHAGRAPKGERTNWMHEYRLDGGTTIPPQD  
SFVVCRIQKAGPGPQNGAQYGAPFVEEWEEDDEDVGLLPVEEKDNDQDQKEISGAMEKGYLQMSDLVQNLVDQNE  
NGTIALPVSDNSNNHSEDVDGNSGDILSDQNLGNSFLHHEVPEQNGLVLENMFSSANAGDLFNISPNDDGFLELKD  
FADIADLENPLANESTIWPSDGPWPWKSTDSMEAVNGASNEFSPLAGEQIFQPEELEQLLQSLQEDSHMGSTISDPPHSSITN  
LAKPEEDCLMFYDAPFDSSMCDGFRQLNGFLGSPSTNLGSDIMVDDGMPYDAMDNDLFDNLLSSVQPSAGSSSHAFS  
GPVLTQEVNNTSTYTSPTQKVLNPFVVGAPSSARLPEAGSQLNYVLPDSQTKSSLIGKRFVKILDSSISAPPAAAAEFPA  
SLRKS LAPISGAHNTIRVSAEVISIGSLTPDSQDKWSLEKDEGMELLSAGFEPDTRVHFGCNTITAVLRGGFCLFFFSAIM  
LLVSYEVGMCIYK\*

>LOC\_Os09g32040

MGMENPLRWPPGFRFSPTDEELVLYFLKRRRIATGRPTYIADVDVYKSHPSHLPERSALRTGDKQWFFFSRMDRKYPNG  
SRASRTTGEYWKATGKDRSICNGGGGTASGRAVGSKKTLYYHHRAPRGRSDWVMHEYTLADALPPAARDREAY  
ALYKLFHKSGAGPKNGEQYGAPFREEDWLDDDDHHHDQLPAEAALPAPATTSGRAATTEHADFELPGGDLDVLLAQIE



NDQDIEAQLDFSTHVTSQVQIQHRVHQGWLSDDDGGKSDVADATTSGSALLMAENTCAELPIDGLEQLLMQISDDQQTVE  
MLSGFSASVPQSQLQHDYHQGCLGVHREEVGVADSTTVSSAVVTEECTVRELQDIEGLLMQIENDQENAESLPDFSTPVH  
LHDCHQAAFQDFQGSQRATFNIANLSTMVQESPFDLQTGPSNQITESILTTEPMNGETNAVEETSPLRSMSVLGSYDRQD  
GDDEFLEINDFDPEDLEQILGSTRSQNLIPADDGVFDSLQYSDAPMFLPGSFDRTGVVAENHYVEFGASGIQNGGFQHTT  
ELLAHNQVALNVRNHMKDNHVVFSSSDATIHTVNEQPPNRSSNASQSWFNGALSALLDSVPSSPAMAAENIGLNRTLQ  
RISSFRSQPAREEVSTLINTRRRGGGLIFISLMVLLVAIMWTFNSGSAVKLSKGLWKFPST\*

>Medtr0036s0150

MSLYQAPGFRFHPTDEEIVCFYLKRKLTGKLPCCFDHLAFIDIYKFEPWDLPNMSKLTCKDLEWYFFSALDKKYGTGCR  
NRATDRGYWKTGKDRVIKNGEETVGMKKTLYVHLGRAPHGNRSNWVMHEYRMIDEELAKTGGQDAYVLCRIFEKSG  
SGPKNGEKYGAPFVEAEWQNVDEPNPLPPVDNQLLEQVAAPAPDYAEFLQSLVAFDNDLLNESVPTATDDNYLEILDLD  
QELDTSVTVGNADLPPNFYEGECSSFPQHSQSEAAFGIYDHQVGGLYGVDSVQDGYNGETNHENPLNDFASEDPDLY  
FDAAEYLRGLNEEYVETNDLKNLDGVDSTVIDPSVSELLDEYLECPDEEDITKYICFDESPIANHVFEAQYNSGVLPKED  
QGAASNWVSGGENAFVKQANKLLAGIPAPFAFASEFPAKELACEIHPAAESSNSAHITAGMISITDITYSGNMMDMWAGK  
NGGFDTIMSNEFSQTAAINSATGLVCRKTACMLSHGWVYLMGFSVILSMLKIGSFMYMGK\*

>Medtr1g090723

MEETAQYQPGFRFHPTDEEIVRYLKKKLTGNLPCFDYLAVIDIYKFEPWDLPKLSKLTTRDLEWYFFTALDKKYGNSI  
RTNRATDRGYWKTGKDRVIKNGEETVGMKKTLYVHSGRAPHGDRSNWVMHEYRMIDETLAKAGVQKDAYVLCRIFE  
KSGSGPKNGEKYGAPFVEEVEWESFGEQVLPPLPPVDNEPLKLEGFPTDDELVNPLAVSVPDDVLDPLDVFYDELWNL  
PDSTYEDFFEAHDLQDLVTSNTVGSALQSNFCYGECSHPQYSQAFINERKQSEATLGVEYEVDPNNIADLYGGNI  
NSVQDGYNGGTNHENPLNFASEVDQPNNIADLYGGNINSVQDGYNGGTNHENPLNFASEDLGQVFHAPDYITG  
VTDEYMETNDIAEMDPSVAAMLGSLADPDDDISNYICFDSPLNARSEPIASYGQPIIEQNVEGETYDSSLTNKHVFEAQ  
SDEVLPKEDLAASNWVSGDANTFVKHLLANIPAPFAFASEFPAKELACEIHPAAESSNSAHITAGMISITDITFRGNAMDW  
MVGKNGGFNTVMSTGFSTQTDVNPATLVPIISGLVCSKTAFMLSHGWVFLMGFSVILSLSFKIGSFMYTGK\*

>Medtr1g097300

MGAVSESASADCFSEVMSSMPGFRFHPTDEELVMYLKRKICGKCLKFNVIKEDTVYKWDPELPEQSFLKTGDRQWFF  
FCHRDRKYPNGRSSRATHGYWKATGKDRNVIYNSRSGVKKTLVYFYLGRAPSGERTDWMHEYTMDEDELRTCRD  
VKDYALYKVFVKSGPGPKNGEQYGAPFKEEVEWADDDVDFNVNSVDREVPEAAIDNVIDQHQLQPLDDEIDEIHKGM  
LDVEPVLQDQHVNGYVDFPQVDEETRNVMQDYFAMVFPDPSEKQSSQLYDAQPSDFNHQSVDSHLCISEAPEV  
TSTPNIQSGEGLVYEEGFLEINDLIDTESTFSNTDKLNNDLIENLQFEDVLESEFDPYQDAEMFLCGLGSINEETVSHAYMN  
NAGSNIENQSYQLSNPEDVNQTVDEFWMHVERNTRSPAEGYDGSFSLTNGVVCDSVGFPTESTENQRSTVEDVKTSSL  
SSALWAFVDSIPTTPASAAENPLVNRALNRMSSFSRVKIKPTDNIAAGNNDTATMKRAGRKGVSFLFFPILIALCAFLWVS  
IGNLRLGRCVSP\*

>Medtr2g086880

MEIVVSKEAQMSIAASSMFPGRFCPTDEELISYLRKCLKDGHEESVQVISEVELCKYEPWDLPAKSFQSDNEWFFFSPRG  
RKYPNGSQSKRATDCGYWKATGKERNVKSNSVIGTKRTLVLVHLAGRAPHGERTEWIMHEYCVSDRSPDLSVVCRLKRNT  
EFRVNDASNRASSQINPVHSHESDCAGQINPVNSHESNCAISEGGTDHRERGICEQEKEVDGSSKRGSSSYGASMEQIDS  
MSESNQRPANDGFLTDSSGQLKMDDEDCYAEILRNDIILKDESSMSQGAQTRPNNLAHSHPCQGTARRRIRLRVPKSTHSQ  
PGARFSKTMHQSSFIARMTNRLMIFAFVFTLTAILFWSSLGGHKQVRNIVGKFNHYVGSIGPVFSTITYRKLHLPRKR  
VTLQVSTLITVVAFTFQPTSTTASRHSFPFYLTSSTYFLTPQPHLTRKEGETLNSSQIDNESSFSITLFRGIMSRPMLLVFL  
ILLIITSQFEWKQPLVSDVESNSSVTQKQHRISNAEETVKEKILVQEKNIIRRLNELVRHLQEQLQCKGSGNGTINSTVGLPTE  
RILELERQQILED\*

>Medtr3g064580

MAPVSLPPGFRFHPTDEELVSYLKRKINGRRIELEIPEVDLYKCEPWLPGKSLLPKGDLEWYFFSPRDRKYPNGSRTNR  
ATKSGYWKATGKDRKVAQTRAVGMKKTLYYRGRAPHGSRGTGWVMHEYRLDERECNPSGLQDAYALCRIFKKT

VIAPKIGEYVNNVARHANHITSQSSSIELYSEGRDEVIGTSNYLMPWDPSTSQNNGTNTLNNNGGNITRDDGIWTQFLS  
EDLLSLPISSFPNYGSTPNYPPSKVDIALECARMQHRFSLPPEVEDFPQVGMNSELKMTQLVSGSMSGTRNETDILQEIL  
SVAQASQELINQSNYSHAFGGNENYAADHENDFTFMVGNVYHVTDHMNSMRYIDDKAWEDPNTRSIEIGDLDFNEFKA  
ERMVENLRWVGMSSNDLEKSFMEEHQKVVPEDISTFKTNRKENEVQVESEQNINKEINDGNIDNFSMGFINDNDTNE  
FIDDSNIDYSNSTSYEVVEETTKVSHGMFVATRQVADTFHQTIPSQTIKVLNPILENKKSIENAETMIIPKNQGYSLLRKF  
KANLMKYMKNPSKIIASAIVFIFALFLVLCVYLKEQVEDMKPKSEYVRRKYSYGANSMMKKIHWNEQEKIWFVGIKSGKGF  
EVILKKIGIFLTISLALCTMWANHMIVCY\*

>Medtr3g093050

MGSLDCVPSVDDGMAVLSLNSLPLGFRFRPTDEELIDYYLRKINGNGDEVVWVIREIDVCKWEPWDMPLSVVRNKDPE  
WFFFCPQDRKYPNGHRLNRATNHGYWKATGKDRKIKSGTILIGMKKTLVYFYSGRAPKGRKRTNWMHEYRPTLKELDGT  
NPGQNPYVLCRLFKKNDESVEVSNYGEVEQTTAPLAANYSPPEIQSDPAPITVSTSQVTEEDKQLAVIPDISEETISNVITS  
VDYHSDGYDAHDVQNQIAKLAEDDQALNFDMYNPKDGLLLDDRLFSPLVHMPQEFHYQANNESDGRCLQYGTN  
EINISDFLNYDLNWDQIPCEVSVSHQPNFPMNLVKDSGSGSNSDVEVANMTGMQAAYPHEAIDRRIPFATPSFSHTFDYS  
GDDQKSNVLLQNNFQTAFPSDVNNTGEVYNAVNGYEQPRTCNTIMSSSESGIVRRARPTRDEQFKTNPMQGTARRIRLS  
KIEHVSCGMVKVKDESCTQEQHNSKPIIAVVRKVCFLCLLDLEVFSAACVVRVFSILQEKAENHASDDESAICTNHACKQ  
RKVPKSIANASKGLRNFLLLGRAPFRSKTSSNCALWSSVFVVSASVLVSLAAFTNIWGYLKF\*

>Medtr5g069030

MGAVVECLPSPQAEELAVLSLNLPLGFRFRPTDEELVDFYLRMKINGNGDEVVWVIREVDVCKFEPWDLPLSIVRNKD  
PEWFFFCPMDRKYPNGSRLNRATTNGYWKATGKDRKIKSGATLIGMKKTLVYFYSGRAPKGRKRTNWMHEYRPTLKELD  
GTNPGQNPYVLCRLFKKQDESASSNCGEAEQTTSTPTTANYSPPEIQSDLNVLPLSSSLATEDERHLAAIPENSEEAMSHV  
ITTADCYSDACNASDAQHQSLVPAEEDQLNLDIFDSPRFELEPDDKLFSPAHAHFPPFEGHQANNELIQYGTNGTDV  
SDFFDSCVNWDEFSSSEASISLELSPNIFKIPENGSCSNSDVEANMMNLLASHDYPEGVTLQNSDVGLFQNNMQMQLSND  
FSMGQMPTVVNEYEQMWNSTVVDGGTGIGIRSRQRQNEQPDMNQVMQAQGSAPRRIRLGGFVARSLVSETTEDGSCA  
SEYEQRILDVTVLGGDDTGIRIRRRQRNEEPNMPVMQAQGSALRRIRLGGFVKHSLVSEETTKDESLEQTEASENHAA  
AESASVLEKTPMSAREICEQHVTAESENSGSKNFFLGRVRCSTKTSISAMRSTVLAYSALDITIPKFNKY\*

>Medtr5g076850

MAPVSLPPGFRFHPTDEELVAYYLRNKINGHKIELEIIAEVDLYKCEPWDLPGKSLLPGNMMEWYFFSPRDRKYPNGSRTN  
RATKSGYWKATGKDRKVNQARAVGVKKTLYYRGRAPHGSRNWMHEYRLDERECETTPSLQDAYALCRVIKSTV  
IVPKVGGQYGNITSDQSPRVELYSERRGEDLDSSNYLMQMKDCSPHNMVNETSLNINGTSRDHGNWLQFSSQDPLFSLPT  
SSSFPNYGAIYPPSKVDIALECARMQHRFAMPPEVEEFPQVGIHQTTQGSRTNNDIMQGLSLTHASQGLMNQSSYSQ  
ALDHNDNYAPYEDDFTFMVGTNYNHINDMSSMGYVDKTWEDLNTRSIEIGDLEDQESKANRVENLRWIGMPREDFEK  
MEEQNVVPIEDISCYQTLREHNGMQEYERHNNNVEQNDNDVDEFWSGFINDGPNDFIEDGNMDGYSNSPSEIIEETK  
VSHRMLVSTQQVAMTLFHQVVPSTLQIQLNPMMPNPNNSKENVDAIMMIMENQGSFFRKFAYVMGKWNLFNPSKEI  
ASLVVVFALLVMHRVYLEEEVEICKPNPKNVKEKRMRESQERVKWNEKSEVWFVGVKCEKGLSVAFKEIGIFLTIFLALC  
TTWASHG\*

>Medtr8g023930

MQTYQHIIHSLSLSLSLILDFLPVGFRRPTNEELVNHYLKLNKLLGNVSHVNNVIAEVDVCRFEPWELPSRSVIKSDDDQ  
EWFFLCPIEYKYAKSKRFRKRTTNGFWKATGNDRSIRKIRGTNKIIGTKKTLVYHEDVPVGVKTNWIIHEYHDAIFDDHQRT  
FVLCRLMKKAENKTEEELDTMICDVGESSRHMSHYENQETLEGISNVSSTMPKIRMESIFEPEYQADKYFPFSTQSSIIY  
ENEREVYFNSQFQGDYFRNEDMVIQSPFETNEEENNFINSMIVDGA PTRQGGKYAIGLIKIYILLSLMVCLFQLMEEGKIIF  
KLPYLHSTFSKTTSKDGSNSYLYASDQTLDDKLTSTKFGYFINNKNLFTLLKHLKTTPEVNTFNLSASFLQLLIPSLLI  
DMKNTHCEAAVVVFIKTRVVMNWTLLRRRLKKQRETAERDGDGDYHWRWCWSYLWIWDQWLEL\*

>PhvuI.006G087000

MNMAPVSLPPGFRFHPTDEELVSYLRRKINGRKIELEIPEVDLYKCEPWDLPGKSLLPKDLWYFFSPRDRKYPNGSR

TNRATKSGYWKATGKDRKVNCAIGMKTLYYRGRAPHGCRGTGWMHEYRLDETQCETNTGLQDAYALCRVFKK  
TAVIPPKVGDQHYVNVSTSHANQIIASDQSSINELYSEGRGEVLESSNYFMSMDTSPNINGTAFNINGGRRDNETAWSHFL  
SEDLNLPASTSSFPNYGSMSPYPSKVDALECARMQHRFSMPPLQMQDLDFPQVGISKLMKEQSSSMGSRNETDIL  
QEILSVAHASQELINQSNYSQPFMANENYAPHETDFTFMVGTNYNHVNDMNTMNMGFVDKAWEDKNTRSIEIGDLD  
DGFKTERMMENLRWVGMSKNVEKSFMEEQNIVPIDDISNFQNTTEENELKVGFEKHSCNKEITDTEIDDFSMGFMND  
EDPNENFLNEENIDYSNSTNYDVVEETKTNHAMFVSTHQVADTFFHQIAPSQTVKVLNPMVAANQCIEKATVKKGSPSF  
RKFACVTKGLIKPSNTVASVLEFIFAFLLMHCVFLKGLVEDWKPDLKRCGCVYSMKNMGEATESVPRNEQEKVWVFGI  
RYGKGFMSVLKKISIFLTISLALFTMWANHIIVDS\*

>PhvuI.007G085600

MGEASGDGNADCFSQMMASMPGFRFHPTDEELVMYYLKRKICGKRLKLVIRETDVYRWDPEELPGQSILKTGDRQWF  
FFCPRDRKYPNGARSNRATRHGYWKATGRDRNVICNSRAVGVKKTLYFYIGRAPSGTRTDWVMHEYTMDEEELKRCQG  
VKEYYALYKVFKKSAGAPKNGEQYGAPFSEQEWAAADDIVDFNIKITDQEAPNVVSENGNVLHPLLDDEINDIIREILDDE  
LVLDQQHVNGFLDFPQVVEETQSTVVDQFSEAVMFPETINSCCEFFDVQPSFEFNQPVTSHLQVSEASEVSSASNVTCKG  
LDLDEDGFLEINDLIDTEPTLANVENPVEHLRFEDGLSELDLYQDAEMFLRDLGANEYTNALVSNNIESQTYQLLCPEDA  
NQTVEFWIHGERNTLSPSEEGFVDSFSLPSAGVVCESLSFPEEGNYNQSSSTVEDVSTSSFSSSLWAFVESIPTTPASAAESA  
LVNRALNRMSSFSRVKIRHTNIAAGKETATTKKAGRKGFSFLFFPILIALCAFLWVFGSLRLLGRCISP\*

>PhvuI.007G140500

MAPIGPGFRFHPTDEELVVFYLRKITGNLSRYDHIAVVDVYKLEPWDLPMSKLTCKDLEWYFFSVLDRKYNGSRTNR  
ATEKGYWKTGKDRPVAHGDRIVGMKKTLYYHIGRAPHGRRTNWVMHEYKMLDEELTRAGTVLDVYVVCRIFEKSGS  
GPKNGAKYGAPLDEKEWDAEDENEQKKVPLPETAHVHVAPLTETPHNVVSPPLPVA AVAPPLVADDEFWNIGAFLETN  
DLDMELDLTDMIGNATFPSSNFHHGECSTHAENSQELIKDQEPLEGTGFSRLENGQPLDMAEQQDMGTSSVRDGDGEL  
SEIENLLNFNYASDNMDLDLYFDATQDLPAADDGSLFETNDLAIGNEGNPTEADPSANDMLDEYLALPDDDICNYISFDLP  
QIPESENSDSNQGSPLTQQTLEGETADKAVVSKHSDSAQTSKEAFSVQNRREEKLAPENSFPVKEAYGWLASIPAAPAHA  
FEFPAKDITLGIHSAQSSHTAHITTMISITDITFRGNAMDWPMGKSGGFNTAISTEFSQPDVNCAALIPLSGKTAFLVLSHG  
WIFLTGFSVLILSLFKIGSMMYTGK\*

>PhvuI.008G189100

MGAAVVECYPPPTAVLSLNTLPLGFRFRPTDEELIDYYLRSKINGNGDDVWVIREIDVCKWEPWDLPLDSVVRNKDPEW  
FFFPCQDRKYPNGHRLNRATSLGYWKATGKDRRIKSGSTLIGMKTLYFYTGRAKPKKRTNWMHEYRPTLKELDGTNP  
GQNPYVLCRLFKKHDESLEASNGEVERAASPMTANHSPEIQSDSSLDPASSQITEGKPLTVIPENSEEVISNIITPVDSH  
SDGCDARDAQNQIVELASEQDQAFNFEDFYDPTNQQLDDKLFSPVHAHFPEIYYQSELQYGTNDNMSDLFDSVNWDAI  
SYDTSSLEPCSSLLNVKDHGSGSDSDVEMANMNTNPQALHGYPKEAVEQKSNVGLFQNSPEMAFSNDGSMGEVDYTTKN  
CGQLRNFDANNNGGTGIRIRSRQGRTEQPNMNGMVPSQGNAPRRIRLLVGRGPPFGSEEA AKDGSCACAPEDHNSKTIN  
TREWKASDNQA ADESSAVADDVDEREKESPESSDLGKITQHQHVATAESISKDHLQVSSNRGMWSYVLGVSATVLSVILV  
VNIWAYVRS\*

>PhvuI.008G241200

MAPVLPPGFRFHPTDEELVAYYLKRKINGRKIELEIIEVDLYKCEPWDLPGKSLLPKGDLEWYFFSPRDRKYPNGSRTNR  
ATKSGYWKATGKDRKVNKARSVMKKTLYYRGRAPHGSRTNWVMHEYRLDERECETASGLQDAYALCRVLKKTAV  
IPQKVEGHYVEVPNVNQITSDQSSSIELYSEGRGEDLDSSNYFMSVNTCSPHNLGIETPLNISGGTTRDEHKWSHVSQDP  
MFSLPTSPHFGAYLPSKVDIALECARMQHRFVMPPLEVDDFPQVGISLKMKTQASSMQGSRPETDILQEILSVAHASQE  
LINQSSYSQEWGGNDYYYAPRDDDFTFMVGTNYNHSNEMSSARYVDKAWEDANTRTIEIGDMQEFKAERMVENLRW  
VGMSREDLEKMEEQNIVPIEDISSLQTNMKENEVQEYEQHNMEHNDTEINDFSLGFINDSDPTENFTEDGNSDDYSGSPSF  
EVVEEIKVNRGMFVSTGQVAETFFHQMVPSQTVQVQLNTVMAHDHYVENAEAMLLIMEDQGLRKKVAYVMGKLLKP  
SMTIASAVVVFALVLMHYAFIKGEVKIWNETCCSNSGSIMKKTQSQQIMKWNEPNEVWVFGIKSEKGLS AVLKKGIFLT  
ISFALCTMWANHN\*

>PhvuI.009G039000

MTSVDCYPSRGDDVAASVSLDSLPLGFRFRPTDEELIDYYLRQKINGNGAEVWVIREIDVCKWEPWDMPLDSVVRNKDPE  
WFFFCPQDRKYPNGHRLNRATTHGYWKATGKDRRIKSGMMLIGMKTTLVFYTGRAPKGRKRTNWVMHEYRPTLKELDG  
TNPQONAYVLCRLFKKHDESLEVSHCDEAEQTASTPIAANYSTEEIQSGLAVAVSPSLVTEDDKHQAIIPHTHSEEAISNVIT  
PVDCHSDGYDISDAQNNYVAPAAEEFQPWNVDMCYDPKNELLYDRLFSPVLALQPEFPYQSNSESDSRYGLQYGTNETNI  
SDFLNSVVNWDELPEEPNCQQWSSPSFNQNSVLGSHIDSELANMTYMQAGYAEANDRKIPLVIAPEFCSTTGIPIDRG  
GGDEQKSNVELFQNNSQRAFTDYQQCSIFNAVPCGDTGIIRKTRVQNEKLSANVTQGTARRIRLVQKTRNELSNKMKVK  
NELDSKSIHAVEEKASENHASDESATLTNDGNELQKTPEPNGNRKICRQVAKASSTLGLKDFLLRRVPYISKATSNRAKCS  
SIFVVS AFLMVSLVVFTDICGYLKF\*

>PhvuI.010G120600

MEIVGFGFRPTEELVDYLYLKHRLLGDDPHVHVIPDIDLCEVEPWNVPMLLAQSAVQFDLPEWFFFSPVDFKYSNSKRVN  
RTTKCGFWKPTGKDREIRSLD TDTLIATKKTLVYYKGRVSRGVKSNWIIHEYHAVTFHESQRTSVLCRLMKKPGPTTEGE  
GDTQTSDEGESSRMVSGYENEAIERGIPSRGTSAGIETTFQPMHQTYNYFPPLQQSPIGIDQEESLPHSPFYSSHFRNESN  
NMQIPFETTQEEEQFLSSIWVDERELGYQMPSIF\*

>PhvuI.010G121100

MEDIISILDHLPVGFRRPTDEELVNHYLKHKLGGDDFSVQFIPEIDLCKVEPWDVPAKSIFKSDELQWFFFSSVDYKYSNS  
KRVNRTTEHGFVKSTGNDRNIKTGGSKNVIGTKTLVFKGRVGGQRTNWVIHEYHALASRESQKTYVLCRLMKKFE  
NKNEGRIDAPNFGGEPSTSMVSDYGNQADILPRMIVDPIFPEEIFFSPVQPPVIEVEGFFPNSTRNACFGNESINMQIPF  
GVTDDDEFLNSILVDNEEFVINEERRDCFVNRSTQPKSLRRVY YASSDTDAEVVSNLHGNICSGEFSVRGGMSSLASNHE  
AHKEKESIIQDDFWAVETSSCDSTADEPVETTRLENRYNLRPNFILQKTAVAGRPQTQKKVSNNAVSHIEARKELVTVKS  
EKDQKSTQNTSSRGILKIRSHQSSNVNSKSSFFYMETTSSNQLFPRS VYLVNVVIGILLIVISWDVLLC\*

>Seita.1G371600

MSSLSPLDSSPAAEVPLAPGFRFHPTDEELVSYLRRRVLGRRLRVDAIAEVDLYRLEPWDLPPLSRIRSRDAQWYFFAHL  
DRKIAGAGAGGRGGPNRTNRATPRGYWKTGKDRVYHRGKAVGMKTLVFHAGRAPKGRSNWVMHEYRLLDAD  
GPQDLHVVCRIQKHGSGPQNGAQYGYMEEWEEEDAIENAPVSGASAGMAAITCAVDEESNEEDENGYCKINELA  
QAHEDSPEMAPLQAQGSKDTSDGSCADGVISLEILQEPLSNINAENIGSSEGQATDDNFSVDDLSTCPTKDDGYVGQ  
DGTLNQSYPEDGNHTNWPLRAYSNQNYANGTLSAEFFD TQNDTNGNAYSEYPQADGFPVPHQQVDGSMVIFYDAPSDY  
NLVDGNDDFVYLNLLNEPLGNESLFDGDDMMAYFDATENDFKYDISGSAKSSNYQFAEMSTNFAQKGDNKVGFDFDI  
AKASEANVQYSASSSGSHEDLYPDS AVPDDDTGDKTFGKRFAGMLGSIPAPPAMASEFPATGKSVGVLSAVSPSSIRV TAG  
IIQLDGLSFTGASERWPLQKNGDFSLLSFTVESDMSTKAACFEQASRMSTIPMVLRS GMYLFFVSAMILVLSYKIGSCIYS  
R\*

>Seita.2G258300

METPPRRRWPFGFRSPTDEELVLYFLKRRIVSARPSYVADVDVYKSHPSHLPERSALQTGDRQWFFFRTDRKYPNGSR  
ASRTTG DGYWKATGKDRFICGGGRAVGNKKTLYYHHGRAPRGERTDWMHEY TLLADALPPAAQGRESYALYKLFQKS  
GAGPKNGEQYGAPFREEDWLDDDEE GVTADASANSVPICPATVEEHAIADRELPIEDLHELLSQIGNDQE EFGA PLDFST  
PATSHGQQGWPSGGDKAEVVDASVSDGAVVAENTCIDLPLGDIEQLMQISDDQNAEFFSDFTPSVPQLQLQCDNH  
QVWLD AHRGQEVCAADPTASGGAVVAECTD TDLEGLLLQIASDQDMVEPLSDLSPPIPHNFNQVIGDFHESHGAPV  
GNLSCTVQESTFVPQTELRSQFPQSNLTNPFSGETNSSEGTSPHVSGLISYNSQDADDEFLEINDFFLEDVEQSANCT  
ATEHLISATNGMFDNLEYS DAPTFLPGPFDTAGEVAENQFFDFGSSGIQNGFHYTTQVVRTQNQAALNVRSHMKDNHVVL  
SSHTSGTLNLHAANEPSSRSSTASQSWFNAALSTLLDSVPSSPALAAEIENTVINRTLQRISFRSHQASGEENTVINRTLQRI  
SSFRSQAVREEPSTRRIQVTRGGRLTFISLLVILAAMWTF TAGSALNFCKGLWKSSSR\*

>Seita.6G055400

MTVMELKALPLGFRFHPTDEELVRHYLKGKITGQINSEVEVIPEIDVCKCEPWLDPDKSLIRSDDPEWFFFAPKDRKYPNG  
SRSNRATEAGYWKATGKDRIKSKGDKRKQHVIGMKTTLVFHRGRAPKGERTGWIMHEYRTEPEFDSGEQGGYVLYRL

FRKQEEKPERASPEEVDRSGYSPTPSRSSPDNIEANEEANTPLNRESPESGLHESPIELPNPVETHAMPITRWLAGRNDNLV  
PTAADVSHMPFNHADVPEVNPSAGASACLINPQNGNDNLTNFAPDIAPNLQHGNFVVDLQEIAGFDGNMNPDALD  
VFLNQALVDPDEHSSTSRVQYDSDIPTFENNGVAQGEDDQSWWANLDFLSDPENPLNSAYENTPLLPYDANDQDVLVS  
DSGADSLHELFFNNMEDSNARRAGMNEYGLQGTGISMPLRQLQSSAQPNYVLTNQGTASRRRLRLHLPADFESAESITRDE  
SEDEVSCVVTTADRDRVSDGDEAESTGIVIRSRPAPSSSESSFTQQGTTVRRLRLQSDLKTGPCSTDDTSSCIINETESHHQ  
PEKSEIAEDASKNFAGSVDDLNVNCDNEQKTMPPQHVAEMAVPEAKPVPRLRKASEKSDKDTIKQESGLESLVRAPVQK  
GGFQSYTAWLVLSVVLVLLSVGVYGM\*

>Seita.6G251900

MTHPSSSSSAPPPAAAEEATSLAPGFRFHPTDEELVSYLKRKVLGRPLKVDIAIEVDLYKLEPWDLPSRSRLSRDSQ  
WYFFSRLDRKHANRARTNRATSGGYWKTGKDREVRHGRPRIVGMKTLVVFHAGRAPKGERTNWMHEYRLEGDEAA  
GIPQDSFVVCRIQKAGPGPQNGAQYGAPFVEEEWEEDDEDVGLLPVEGDVVDHEVPPGPKIIPGALEKGYLQMSDLIQ  
GLGDQNGNGTIGLPISDTSNNSNHSEDDVDGNSGDILSDPNLGSNFLQYVEPGEQNSLMLSDNMISNANAGDFFNNSPSSD  
GFLELKDFADAANLDYPLGNSTVWPSDGWAWKTPNSLEAVNGANNDIPLPDDQTFQPELEQLLQSIQEDSHFGSSIID  
PSHSSITNSVMPEDDSLMEFYDAPFDSTICDDGFRQVNGILSSPATNLSGIGMVDDGMPYYDATDDNLFNDILGSIQPPAGSS  
HAFNGPVLTEVNNTMYTYSPTQKVLPEPNFVVGAPSSARLPEAGSQLNCVVLDPGQAKSSTYKGFVKILDSISAPPAFA  
LEPANLCKSLAPISGARPNTHVSAEVISIGSLAVASGPDKWAQQKQDQGMELLFTDFEPGTRVHCGCNPITTVLRGGFCLVF  
FSAIMLLVSYEVMCIYK\*

>Seita.4G000700

MAAAQAHAQAQRGERKAMPSPPPPPPPGALPVGFRFRPTDEELVCHYLKPKIAGRHPDLLLLIPDVLDSACEPWELPA  
KALIRSDDEPWFAPLDRKYPGGHRSNRSTAAGYWKATGKDRILRSRPAAGTLIGIKTLVFRGRAPRGHRTSWIMHEY  
RTAEPQLQQGNGSFLYRLFDKHEEEPEAADAADSPSTSSAADPPPIAPAVKAENLCQPASAKMAHLLTTLSSNEPTAA  
QEGDPLLDVLAQLPDLQPEQTYDGFPTTSPMRPYTDHPFLGNVGGQDLSAYIDSIAHQDLEDLLVNPSLAKTVEHPTGN  
FEPIPTSLVPSSSSSNNRSPENSWANLDTERLLLIQGADGTDAAACSSATKILQFDTGDANHDTGPQTDASGVSAEAS  
HLYNQYQLQSASIPQMEARSDMTDSDAFNGLGSAPEPLMQQLSVSNFTDPHQGTALRRIRLVHSIQRASVTEPVLTSNS  
EGEDEERSCYSTDNSSTNEDYANAGGAMHSQGGGVIPQVVSSTEVTGELQDFIFDEGASSLHGTVRHGGNLKRRRLKE  
EYMETNQDAGEILQQSIRVPREPSLRRRQRISVVRVLCALVILVFLVGLWKCI\*

>At4g29230

MNKSNPAGSVTGSIDIIDAKIEEHQLCGSKKCPSCGHKLEGKPDWVGLPAGVKFDPTDQELIEHLEAKVLAKDFKSHPLI  
DEFIPTIEGEDGICYTHPEKLPVTRDGLSRHFFHRPSKAYTTGTRKRRKIQTCDNNLQSSSSGETRWHTGKTRPVMV  
NGKQKCKKILVLYTNFGKNRKPCKTNWVMHQYHLGTHEEEKEGELVVSIFYQTQPRQCNWSSSTSSLNAIGGGGGEA  
SSGGGGGEYHMRRDSGTTSGGSCSSSREIINVNPPNRSDEIGGVGGVMMAAAAAVAAGLPSYAMDQLSFVPMKSF  
EVARRETPQTGHATCEDVMAEQHRHRHQSSSTSHHMAHDHHHHHHQQQQQRHAFNISQPTHPISTIISPSTSLHHASIN  
ILDDNPYHVHRILLPNENYQTQQQLRQEGEEHNDGKMGGRSASGLEELIMGCTSSSTTHHDVKGSSSMGNQQAQEWL  
KYSTFWPAPDSSDNQDHHG\*

**Data Set S2. NAC domain sequences of GmNTLs**

>Glyma02g38710.1/GmNTL1

--

LPLGFRFRPTDEELIDYYLRKSKINGGDDVWVIREIDVCKWEPWDLPLDSVVRNKDPEWFFFCPQDRKYPNGHRLNRATS  
HGYWKATGKDR-RIKSG--STLIGMKKTLVFYTGAPKGRNTNWMHEYR--

>Glyma02g40750.1/GmNTL2

--

LPPGFRFHPTDEELVAYYLKRKINGRKIELEIPEVDLYKCEPWDLPGKSLLPKGDLEWYFYSRDRKYPNGSRTNRATKSG  
YWKATGKDR-KVNSQ--ARAVGMKKTLVYRGRAPHGSRTNWMHEYRL-

>Glyma04g40450.1/GmNTL3

--

LPLGFRFRPTDEELVNYLQKINGNGREVVVIREIDVCKWEPWDMPLSVVQTKDPEWFFFCPQDRKYPNGHRLNRAT  
NNGYWKATGKDR-KIKSG--TILIGMKKTLVFYTGAPKGNRTNWMHEYR--

>Glyma06g14290.1/GmNTL4

--

LPLGFRFRPTDEELVNYLQKINGNGRQVWVIREIDVCKWEPWDMPLSVVQTKDPEWFFFCPQDRKYPNGHRLNRAT  
NNGYWKATGKDR-RIKSG--KDLIGMKKTLVFYTGAPKGNRTNWMHEYR--

>Glyma07g05351.1/GmNTL5

--

MPVGFRFRPTDEELVNYLKHKLADDFPVHIIPEIDLCKVEPWDPERSVIKSDPEWFFFSVDYKYLKSKRFNRRTTKR  
GYWKTGDR-NVKIPGTSNVIGTKKTLVFHEGRGPRGVKTNWMHEYHA-

>Glyma10g197600.1/GmNTL6

--

MGPGRFHPTDEELVVFYLRKMTGNLSRYDHIAVDVYKLEPWDLPLSLSKLTKDLEWYFFSALDRKYNGYRTNRAT  
ERGYWNQTGIEH-FVHAD-----LFMYLSS-----FMRVY--

>Glyma10g36360.1/GmNTL7

---

MPPGFRFHPTDEELVMYYLKRKICGKRLKLDVIRETDVYKWDPELPGQSILKTGDRQWFFFCRDRKYPNGGRSNRATR  
RGYWKATGKDR-NVICN--SRVGVKKTLVFYAGRAPSGETDWMHEYTL-

>Glyma11g33210.1/GmNTL8

---

PPGFRFHPTDEELVSYLKRKINGRKIELEIPEVDLYKCEPWDLPGKSLLPKGDLEWYFFFSRDRKYPNGSRTNRATKSGY  
WKATGKDR-KVNSQ--SRAIGMKKTLVYRGRAPHGCRTGWMHEYRL-

>Glyma12g186900.1/GmNTL9

--MFPGRFCPTDEELISYYLRKKMDGHQESVQVISEVELCKYEPWDLPAKSFIQSDN-

EWFFFSRGRKYPKGSQSKRATECGYWKATGKER-NVKSG--SNVIGTKRTL VFHLGRAPKGERTEWIMHEYCIN

>Glyma13g39090.2/GmNTL10

--MFPGRFCPTDEELISYYLRKKLEGHEESVQVISEVELCKYEPWDLPAKSFIQSDN-

EWFFFSRGRKYPNGSQSKRATECGYWKATGKER-NVKSG--SNIIGTKRTL VFHLGRAPKGERTEWIMHEYCI-

>Glyma14g36840.1/GmNTL11

--

LPLGFRFRPTDEELIDYYLRKSKINGNSDDVWVIREIDVCKWEPWDLPLDSVVRNKDPEWFFFCPQDRKYPNGHRLNRATN  
HGYWKATGKDR-KIKSG--STLIGMKKTLVFYTGAPKGRNTNWMHEYR--

>Glyma14g39080.1/GmNTL12

--

LPPGFRFHPTDEELVAYYLKRKINGRKIELEIPEVDLYKCEPWLPGKSLLPGKDLEWYFFSPRDRKYPNGSRTNRATKSG  
YWKATGKDR-KVNSQ--ARAVGMKKTLVYYRGRAPHGSRTNWMHEYRL-

>Glyma18g05020.1/GmNTL13

VSLPPGFRFHPTDEELVSYLKRKINGRKIELEIIHEVDLYKCEPWLPGKSLLPGKDLEWYFFSPRDRKYPNGSRTNRATK  
SGYWKATGKDR-KVNSE--SRAIGMKKTLVYYRGRAPHGCRTGWMHEY--

>Glyma20g31210.4/GmNTL14

----

PGFRFHPTDEELVMYYLKRKICGKRLKLDVIHETDVYKWDPELPGQSILKTGDRQWFFFCHRDRKYPNGGRSNRATR  
GYWKATGKDR-NVICN--SRVGVKKTLVYAGRAPSGERTDWMHEYTL-

>Glyma20g33390.1/GmNTL15

----

PGFRFHPTDEELVVFYLRKMTGNLSRYDHIAVVDVYKLEPWLPLSKLKTGDLEWYFFSALDRKYGNRSRTNRATDR  
GYWKTGKDRPVTHGDR---TVGMKKTLVYHSGRAPHGRRTNWMHEYKM-

### Data Set S3. *NTLs* cds sequences

>AT1G32870

ATGGACTTGTCCGGTTGAGAACGGAGGTTTAGCTCCAGGTTTTAGGTTTCATCCGACGGACGAAGAACTTGTCTCTATTA  
TCTCAAAAGAAAGATCCGTC  
GGAAAAAACTCAGAGTCGAAGCAATCGGCGAGACTGATGTCTATAAGTTTGATCCTGAGGAATTACCTGAGAAAGCGTTG  
TATAAGACTAGAGATCGTCA  
ATGGTTCTTTTTCAGCTTAAGGGATAGGAAACATGGAAGTAGGTCAAGTAGAGCTACTGAACGTGGCTATTGGAAAGCAA  
CAGGGAAGGATAGAGTCATT  
CATTGTGATTCGAGACCCGTTGGAGAGAAGAAGACTCTTGTTTTCCATAGAGGCAGGGCACCTAATGGCGAACGGACTAA  
TTGGGTGATGCATGAGTATA  
CATTGCACAAAGAGGAGCTCAAGAGGTGTGGTGGTGAAGATGTTAAGGATGCTTATGTTCTTTACAAGATTTATAAGAAA  
AGTGGGTCTGGTCCTAAGAA  
TGGTGAGCAATATGGAGCTCCTTTTATTGAAGAAGAATGGGCTGAAGATGATGATGATGATGTTGATGAGCCTGCTAATC  
AGCTCGTTGTTTCGGCTAGT  
GTTGATAATAGTTTATGGGGGAAAGGGCTTAACCAATCTGAATTGGATGATAATGATATTGAAGAGCTGATGAGTCAGGT  
TAGAGATCAGTCTGGTCCAA  
CATTGCAGCAGAATGGGGTGTCTGGACTGAACTCTCATGTAGACACGTATAATCTGGAGAACCTGGAGGAAGATATGTAT  
TTGGAAATCAATGATCTTAT  
GGAACTGAACCTGAACCAACTTCTGTGGAAGTCATGGAGAATAACTGGAACGAGGATGGTCTGGTCTCCTGAATGATG  
ATGATTTCGTTGGTGCTGAT  
TCATATTTCTTGATTTGGGAGTGACAAATCCTCAGTTAGATTTTGTAGTGGTGATTTGAAAAATGGGTTTGCACAAAG  
TCTTCAGGTGAATACTTCTT  
TAATGACTTACCAGGCCAATAATAACCAGTTCAGCAGCAATCAGGGAAGAACCAAGCTAGTAACTGGCCACTCCGTAAC  
AGCTATACCAGACAGATAAA  
CAATGGATCATCGTGGGTGCAGGAGCTAAACAATGACGGACTTACCGTTACCCGGTTTGGTGAGGCGCCTGGTACAGGTG  
ATTCATCTGAATTCCTAAAC  
CCTGTTCTTCTGGTATAAGTACAATAATGAAGATGACCCGTCAAAGACGAGTCTAGTAAGTTTGCTTCTAGTGTATG  
GACTTTCCTGGAATCCATTC  
CTGCAAAGCCAGCATATGCATCAGAGAATCCATTTGTGAAGCTGAACCTTGTTAGAATGTCAACCAGTGGTGGTTCGTTTC  
AGGTTTACTTCTAAAAGCAC  
AGGTAATAATGTTGTTGTTATGGATAGTACTCAGCAGTGAAGAGGAACAAGTCTGGAGGAAACAACGATAAGAAGAAGA  
AGAAGAACAAAGGTTTCTTT  
TGCTTATCGATCATTGGGGCTTTATGTGCTTTGTTTTGGGTGATCATAGGAACAATGGGAGGTTTCAGGGAGGCCTTTGTT  
ATGGTGA

>AT1G33060

ATGAACCAATAAAAAACAAAACCTTACCAGGAGATGACGACGGAGCAAGCTTTGTTGTCTATGGAAGCTTTACCTTTAGG  
TTTCAGATTCAGACCAACGG  
ATGAAGAACTCATCAATCATTACCTAAGGTTAAAAATCAACGGCCGTGATTTAGAGGTTAGAGTCATCCCTGAGATCGAT  
GTTTGCAAGTGGGAACCATG  
GGACTTACCTGGGCTATCCGGTGATAAAGACAGATGATCAAGAATGGTTCTTTTTTTGTCCTCGTGATCGAAAAGTATCCGA  
GTGGTCATCGTTCTAATAGA  
GCTACTGATATTGGTTACTGGAAAGCTACTGGGAAAGATCGAACTATTAAGTCTAAGAAGATGATTATTGGTATGAAGAA  
GACTCTTGTCTTCTATCGTG



GAAGAGCTCCTAGAGGAGAGCGTACTAATTGGATTATGCATGAGTATCGTGCTACAGACAAGGAACTAGATGGTACTGGA  
CCTGGTCAGAATCCGTATGT  
TTTGTGTCGCTTGTCCACAAGCCTAGTGATAGTTGTGATCCTGCACACTGTGAGGAAATAGAGAAAGTTAATTTACTC  
CAACCACCACCCTAGATGC  
TCTCCTGATGACACATCTTCTGAAATGGTCCAAGAAACAGCTACATCTGGTGTACATGCTCTAGATAGATCAGATGACAC  
TGAGAGGTGTTAAGTGACA  
AGGGCAATAATGATGTGAAACCTGATGTTTCAGTGATAAACAATACTTCTGTCAATCACGCTGAAACTTCTCGTGCCAAA  
GACCGTAATTTGGGCAAGAC  
GTTAGTAGAGGAAAATCCACTTCTAAGGGACGTTCCAACCTTTCATGGACCCATCTTGAGTGAGAAATCATATTATCCAG  
GACAGTCAAGCATCGGTTTT  
GCTACATCTCACATGGATTCTATGTATTCTAGTGATTTTGAAACTGTGATTATGGGCTACATTTTCAAGATGGTGCCTC  
TGAACAAGATGCATCTTTAA  
CAGATGTCTTGGATGAAGTATTCCATAACCATAATGAATCCTCTAATGACAGGAAAGACTTTGTACTTCCGAATATGATG  
CATTGGCCTGGTAATACAAG  
ACTGTTGTCTACTGAGTACCCATTTCTCAAAGATTCTGTTGCTTTTGTGACGGCAGTGCTGAAGTTCCGGCTCACAGC  
AATTTGTTCCCTGACATTTTA  
GCTTCTAGATGGGTCAGTGAACAGAACGTTGATAGCAAGGAGGCAGTAGAGATTCTATCTTCAACCGGGTCTCTCGGAC  
CTTGACGCCACTTCATAACA  
ACGTTTTTGGGCAATATGCTTCATCGTCTTACGCAGCTATCGATCCATTTAACTATAATGTCAATCAGCCTGAACAGTCA  
TCCTTTGAGCAAAGCCATGT  
TGACCGCAACATTAGTCCCAGTAACATTTTTGAGTTCAAGGCTAGGTCTCGAGAGAATCAGAGAGATCTGGACTCTGTTG  
TGGACCAAGGCACTGCTCCT  
AGAAGAATTCGGCTGCAGATCGAACAGCCATTGACGCCAGTTACCAACAAGAAAGAGAGAGATGCGGACAACCTATGAAGA  
AGAAGATGAAGTACAATCTG  
CCATGTCCAAGGTCGTAGAGGAAGAACCGGCTAATTTAAGTGCTCAGGGGACTGCTCAGAGGAGAATCCGCCTGCAGACG  
AGATTGAGGAAGCCTCTCAT  
AACCTAAACAATACAAAAAGAACTCAAATGGCAGAGAAGGAGAAGCAAGCCATAGGAAGTGTGAAATGCAGGAAAAAG  
AAGATATATCATCATCATCA  
TCATGGCAGAAAACAGAAGAAGAGCTTGGTGCAGTTTAGTAGTGTGGTGATAATAGTGGCGGTGATAGTTGTTTTAGTAGA  
AATATGGAAGAGTCAAGAG  
ATGCGAAATGTAGCTTCTTGTTCATCAATTAGATTCCTTCAAAGGCATGTTTACTTGA

>AT1G34180

ATGGTTGATTCTTCTCGTATTCTGTTTCAAAGCTGGTAAGTTTAGTGCTCCAGGTTTTCGATTTACCCTACTGATGA  
AGAGCTTGTGGTTTATTATC  
TTAAGAGGAAGATCTGTTGTAATAAACTTCGAGTCAATGCCATTGGTGTCTGTTGATGTTTACAAAGTCGATCCTTCTGAA  
TTGCCTGGTAATTTTCAACA  
CCTTCTTATCGATTTTGATTTCATGTCTATCGATGTTGAAGACGGGAGATAGACAGTGGTCTTTTTCACTCCAAGGAATA  
GGAAGTATCCTAACGCAGCT  
AGGTCAAGTAGAGTACTGCAACTGGTTATTGGAAGGCGACAGGAAAGGATCGAGTCATTGAGTACAATTCAAGATCTGT  
TGGACTCAAGAAGACTCTTG  
TTTTCTATAGAGGTCGTGCTCCTAATGGTGAGAGAACTGACTGGGTGATGCATGAGTACACTATGGATGAAGAAGAGCTA  
GGGAGATGTAAGAACGCTAA  
GGAGTATTATGCTCTTTATAAGCTTTATAAGAAGAGTGGGGCTGGTCTAAGAATGGTGAACAGTATGGTCTCCGTTCC

AAGAAGAAGAATGGGTTGAT  
AGTGATAGTGAAGATGCAGATAGTGTGCGTGTACCGGATTATCCCGTGGTCCGTTATGAGAATGGTCCTTGTGTGGATGA  
TACTAAATTTTGAATCCTG  
TCAAACCTCAGTTAGAGGATATTGAGAAGCTTCTCAATGAAATCCAGATGCACCCGGGTTAACCAAGACAGTTTGAT  
GAGTTTGTGGTGTCCACA  
GGGTAATAGTGCAGAAGTGATACAGAGCACATTGCTGAATAATTCTTCTGGAGAGTATATTGACCCTCGGACGAATGGAA  
TGTCTTGCCAAATGGCCAG  
CTATACAACAGGGACTCGAGTTTTTCAGTCCCATTGAAATTCATTTGAGGCTACCTCTGGTATGGCACCTCTTCTAGATAA  
TGAGAAGGAGGAGTACATTG  
AAATGAATGATCTTCTGATCCCTGAGCTCGGTGCTTCTCAACAGAGAAATCCACAGAGTTCTTGAACCATGGTGAATTT  
GGTGATGTTAATGAATACGA  
CCAATTGTTCAATGACATATCTGTTTTTCAGGAACTTCTACAGATCTGTCTTGTCTGAGTAATTTTACTAATAACACAT  
CAGGCCAAAGACAGCAATTA  
CTTTATGAACAGTTCCAGTACCAGACACCTGAGAACCAGCTTAATAACTACATGCATCCTAGTACCACTCTTAATCAGTT  
CACTGACAATATGTGGTTTA  
AAGATGATCAGGCTGCTCTATGTTCAACCACCACAATCTTCTTCTGGAGCATTCACTTCACAGTCAACAGGTGTGATG  
CCTGAGTCTATGAATCCAC  
TATGAGTGTAATCCCCAATACAAGGAAGGACAAAATGGTGGTGGAAACAAGGAGCCAGTTCTCATCAGCTCTGTGGGAAT  
TATTGGAATCAATACCATCA  
ACACCAGCCTCTGCTGTGAGGGTCCCTTAACCAGACCTTTGTGCGTATGTCTAGCTTACGCCGCATCAGGTTCAATGG  
AACGTCAGTACTAGTAGAA  
AAGTCACTGTAGCAAAGAAGCGTATCAGTAACAGAGGTTTTCTTCTGTTATCAATTATGGGTGCTTTGTGTGCTATCTTC  
TGGGTGTTCAAAGCCACCGT  
TGGAGTTATGGGAAGACCTCTCTTGTGCTGA

>AT1G34190

ATGGCGGATTTCTCACCCGATTCGTGTTCAAAGGAGGCAAATTTAGTGCTCCAGGGTTTCGATTTTCATCCAACCTGATGA  
AGAGCTTGTGATGTATTATT  
TGAAGAGGAAGATTTGTAGGAAGAGGCTTAGAGTTAATGTTATCGGTGTTGTTGATGTTTACAAAATGGATCCTGAGGAA  
TTGCCTGGTCAATCAATGTT  
GAAGACGGGAGATAGACAGTGGTTCTATTTCACTCCAAGGAGTAGGAAGTATCCAAACGCAGCTAGGTCTAATAGAGGAA  
CTGAAAATGGGTATTGGAAG  
GCTACAGGGAAGGATCGAGTCATTGAGTATAATTCTAGATCGGTGGGACTTAAAAAGACTCTTGTCTTCTATAGAGGCCG  
GGCTCCTAGTGGTGAAGCGGA  
CTGATTGGGTGATGCATGAGTATACGATGGATGAAGATGAACTAGGGAGATGTAAGAACCCTCAGGAGTACTATGCTCTT  
TATAAGTTGTTCAAGAAAAG  
TGGGGCTGGTCTAAGAATGGTGAACAGTATGGTGTCCGTTTCAAGAAGAGGAATGGGTTGATGATGATAATGAAGATG  
TGAATGCTATTGCTGTAGCT  
GTGCCAGAGCAACCTGTGGTTCGTTATGAGGATGCTCGTGTGGATGAGAGGAGACTTTTTAATCCTGTTATTCTTCA  
GTTAGAGGATATCGATGAGC  
TTCTCAATGGAATCCCTAATGCACCTGGTGTTCCTCAAAGATGTATTCTCAGGTGAATAGTGAAGAAGAGCTGCAGAGT  
ACGTTGGTGAATAATTCTGC  
TAGAGAGTTCTTGCCAAACGGTCAGCAATACAACAGGCCCTCAAGTTTTGACTCATTAGAGACCGCTGAGGTCACCTCAG  
CTCCTCTGGTGTGAGAAG

GAAGATTTTCATTGAAATGGATGATCTTCTTCTGATCCCTGAATTCGGAGCTTCTTCAACTGAGAAAGCCGCACAGTTCTC  
GAACCATGGTGAATTCGACG  
ATTTTAATGAGTTTGACCAATTGTTCCATGACGTTTCCATGTCTTTGGATATGGAACCTATTGATCAGGAACTTCTGCA  
AATCTGTCTTCTCTGAGTGA  
TTCTGCTAACTACACATCAGACCAAAAACAGCAACTCCTTTATCAACAGTTCAGGACCAGACTCCCGAGAACCAGCTGA  
ACAACATCATGGATCCTAGT  
ACAACCTCTCAATCAAATCACTAGCGATATTTGGTTCGAGGATGATCAGGCCATTCTATTTGATCAACAACAATCCTTTTC  
TGGAGCATTGCTTCACCCT  
CATCAGGTGTGATGCCTGATTCCACCAATCCTACTATGAGTGTGAATGCCAAGGCCATGAAATCCAAAATGGTGGTGGGA  
ACAACAAGCCAGTTCTCATC  
GGCTTTGTGGGCATTAATGGACTCAATACCTTCAACGCCAGCCTCTGCGTGTGAGGGTCCCCTTAACCGAACCTTTGTAC  
GTATGTCTAGCTTCAGCCGT  
ATGAGGTTCAATGAAAGGTAATGGAACGCCAGTGAAGTACTACCATAGCAAAGAAGGGTATTAGAAACAGAGGTTTTCT  
TCTATTATCAATCGTGGGTG  
CTTTGTGTGCCATCTTCTGGGTGTTGGTAGCCACAGTTCGAGTCTCAGGTAGAAGTCTTCTCTTGAAGACTAG

>AT1G65910. 1

ATGGCTCCTGTTTCAATGCCTCCAGGTTTCCGGTTTCATCCAACAGACGAAGAGCTTGTCATATACTACCTCAAGCGAAA  
GATTAATGGTCGGACTATTG  
AGTTAGAGATAATACCCGAGATTGATCTTTACAAATGCGAACCTTGGGATTTACCTGGGAAGTCTTGCTGCCAAGTAAA  
GACCTAGAATGGTTCTTTTT  
CAGTCTCGAGACCGAAATATCCAAACGGATCAAGAACAAACCGGGCGACCAAAGCAGGTTACTGGAAAGCCACCGGGA  
AAGATCGTAAAGTGACTTCA  
CATTACGGATGGTTGGAACAAAGAAAACATTAGTTTATTACCGAGGAAGAGCGCCTCATGGCTCTCGTACCGATTGGGT  
CATGCACGAGTACCGTCTTG  
AAGAACAAGAAATGTGACTCTAAATCCGGTATACAGGATGCCTATGCACTTTGTCGAGTATTTAAGAAGAGTGCTTTAGCC  
AACAAAATTGAAGAACAACA  
CCATGGTACGAAGAAGAACAAGGAACGACTAATAGTGAACAATCTACTTCTAGTACTTGTGTTGATTCTGATGGAATGT  
ATGAAAACCTCGAAAACCTCG  
GGGTATCCAGTCTCACCTGAGACAGGAGGCTTAACTCAACTCGGTAATAATTCGTCGTCGGATATGGAACGATAGAGAA  
TAAATGGAGTCAGTTTATGT  
CGCATGACACGTCCTTCAACTTCCCACCTCAGTCTCAATATGGAACAATCTCATATCCTCCCTCGAAGGTTGATATAGCG  
TTAGAGTGTGCAAGACTACA  
AAATCGTATGTTGCCACCAGTACCACCTTTACGTAGAAGGTCTCACACACAATGAATATTTTGGAAACAATGTAGCTA  
ACGATACAGATGAAATGTTG  
AGCAAGATTATAGCATTGGCTCAAGCCTCACATGAGCCACGAAACAGTCTAGACTCATGGGACGGTGGTTCTGCTCCCG  
GAACTTCCATGGAGACTTTA  
ACTATTCCGGAGAAAAAGTCTCATGCCTAGAGGCGAACGTGGAGGCTGTAGATATGCAAGAACACCATGTGAATTTTAA  
GAAGAAAGACTTGTTGAAAA  
CTTGAGATGGGTAGGAGTATCAAGCAAGGAACCTGAAAAGAGCTTCGTTGAAGAACAACCTCAACGGTAATTCCTATAGA  
ATATTTGGAGATATCATAAT  
GATAATCAAGAACAAGAACATCATGATCAAGATGGTATGGACGTTAACAACAACAATGGAGATGTGGATGATGCTTTCAC  
ACTCGAGTTTTTCGAAAACG  
AACATAACGAGAATCTTTTGGACAAGAACGATCATGAGACAACGAGTTCCTCATGTTTTGAGGTGGTAAAAAAGTTGAG

GTTAGCCATGGATTGTTTGT  
CACAACCTCGTCAGGTAACCAACACATTCTTCCAACAGATAGTACCATCGCAAACCGTTATAGTTTATATAAAATCCGACGG  
ATGGCAATGAGTGTGTCAT  
AGTATGACATCAAAAGAGGAGGTTTCATGTCCGTA AAAAGATAAAATCCGCGAATCAACGGAGTAAGCTCAACAGTTCTTGG  
ACAATGGAGAAAATTCGCGC  
ATGTTATTGGCTTCATTCCTATGCTTCTATTGATGCGTTGTGTTCATCGAGGTA ACTCTAACAAAAACAGAGGCAGTGAA  
GGTACTCGAGGCAGCCTAC  
GAGAGGAGATTGTAACAATCGGGGAACAATACTCATGATGGAAAATGCTGTCGTGAGAAGAAAAATTTGGAAGAAGAAGA  
AAGAGAAAAATATGGTTGAC  
GAACAAGGTTTTCGGTTTCAAGATAGTTTCGTATTGAAGAAGTTGGGGCTTCTCTTGCTATCATCTTAGCTGTTTCTAC  
CATAAGTCTTATTTGA

>AT2G27300.1

ATGTCTAAAGAAGCTGAGATGTCGATCGCGGTGTCGGCTTTGTTCCCTGGTTTTAGATTCTCTCCTACTGATGTTGAACT  
TATCTCGTACTATCTTCGTC  
GTAAAATCGATGGTGATGAGAACTCTGTTGCTGTGATTGCTGAGGTCGAGATTTACAAGTTCGAGCCGTGGGACTTGCCA  
GAGGAATCGAACTGAAATC  
GGAGAACGAGTGGTTTTACTTCTGCGCGAGGGGGAGGAAGTACCCGCACGGGTCAAAAGCCGGCGAGCCACACAGCTAG  
GATATTGGAAGCGACCGGT  
AAAGAGCGGAGTGTTAAATCCGGAACCAAGTTGTTGGAACCAAGAGAACGCTTGTATTTCATATCGGTGCGGCTCCTCG  
TGGCGAGAGAACGGAGTGGA  
TTATGCATGAATACTGCATCCATGGAGCCCCACAGGATGCATTAGTGGTGTGCCGTTAAGAAAAATGCTGATTTTCGG  
GCTAGTTTCGACCCAAAAAAT  
GGAGGATGGTGTGTCGAAGACGATGGCTACGTTGGCCAAAGAGGTGGTTTTGGAGAAGGAGGACAAATCCTACTATGAAT  
CTGAGCATCAGATACCAAT  
GGTGACATCGCAGAATCATCAAATGTTGTTGAGGATCAGGCCGATACCGATGATGATTGTTACGCCGAGATTCTGAACGA  
TGATATAATAAAGCTCGACG  
AAGAAGCGTTGAAAGCTAGCCAAGCGTTTCGACCAACTAATCCAACTCATCAAGAAACAATATCAAGCGAGTCATCGAGT  
AAGAGGTCAAAATGTGGTAT  
AAAAAAGAATCAACGGAACAATGAATTGTTACGCTTTGTTTCAGGATCAAGAACGTTGCCGGAACCGACTCCAGCTGGA  
GATTCGGAACCGTTCAAA  
ATCAAGAAAGATGATAGCCAGAGATTGATGAAGAATGTTCTGGCCACTACTGTTTTCTTGCTATCTTATTTCTTTCTT  
TTGGACTGTATTAATAGCTA  
GGAACTAA

>AT3G10500.1

ATGGGTCGTGGCTCAGTAACATCGCTCGCTCCTGGGTTTCGTTTTTCATCCCACAGACGAAGAACTCGTTCGTTACTATCT  
GAAACGAAAGATCTGCAATA  
AACCTTTTAAGTTCGATGCTATCTCTGTTACCGATGTATACAAATCTGAGCCTTGGGATCTCCAGACAAGTCGAGGCTG  
AAAAGTAGAGACTTGGAGTG  
GTACTTCTTCAGTATGCTTGATAAGAAGTATAGAAATGGATCAAAGACGAATCGTGCGACTGAGATGGGATATTGGAAGA  
CTACAGGGAAAGATCGAGAG  
ATTCTTAATGGTTCAAAAGTCGTTGGGATGAAGAAGACTCTTGTTTATCACAAAGGTCGAGCTCCTCGTGGCGAAAGAAC  
CAATTGGGTTATGCATGAGT

ATCGGTTGGTTGATCAAGACCTTGATAAACTGGTGTTCACCAAGATGCGTTTGTGCTTTGTAGGATTTTCAGAAGAGT  
GGCTCCGGACCTAAAAATGG  
AGAGCAGTACGGTGCTCCGTTTGTGAGGAGGAGTGGGAGGAGGAGGATGATATGACATTTGTACCTGACCAAGAAGATC  
TTGGAAGTGAAGATCATGTT  
TATGTCCATATGGATGACATTGATCAGAAGTCTGAAAACCTTGTGGTCTATGATGCCATTCCTATTCCGTAAACTTTAT  
TCACGGGGAGTCGAGCAATA  
ATGTTGAAACAACTACTCAGACTCCATAAACTATATACAACAAACAGGAACTATATGGACTCTGGTGGCTACTTTGAG  
CAACCAGCAGAATCTTATGA  
GAAAGATCAGAAGCCTATCATCCGTGACCGTGATGGTAGCCTTCAAATGAAGGAATTGGATGTGGGGTCCAGGACAAGC  
ACTCGGAACTTTGCAATCT  
TCTGACAACATCTTTGGGACTGATACATCATGCTACAATGATTTTCCAGTTGAGAGCAACTATTTGATTGGTGAGGCGTT  
TCTGGATCCGAACAGTAATC  
TTCTGGAGAATGATGGTCTGTACCTGGAAAACAAATGATCTCAGTAGTACTCAGCAAGATGGTTTCGACTTTGAAGATTAT  
CTTACCTTCTTTGATGAAAC  
TTTTGATCCTTCGCAACTGATGGGAAATGAAGATGTTTTTTTCGATCAAGAAGAGCTCTTCAAGAGGTTGAGACTAAGG  
AACTAGAGAAAAGAGGAGACT  
TCAAGAAGCAAACATGTGGTGAAGAAAAGGAAAAGGATGAAGCATCTTGTTCAAAACAAGTTGATGCAGATGCAACAGA  
GTTTGAGCCAGATTACAAGT  
ACCCGTTACTAAAGAAGGCAAGCCACATGTTGGGTGCTATTCTGCTCCGCTTGCAAATGCTTCTGAGTCCCTACAAAAG  
GATGCAGCTATCCGGTTACA  
CGCAGCACAATCATCAGGTTCAAGTTCATGTAACCGCAGGTATGATCAGGATATCAGACAGCAACATGGGCTGGTCATACG  
GCAAAAACGAGAACCTTGAC  
TTGATCCTTTCTTTGGGGTTGGTCCAAGGGAATACCGCCCCGAAAAATCAGGGAATAGTTCAGCATGGGCAATGTTAAT  
ATTCATGTGTTTCTGGGTTT  
TTCTACTCTCAGTTAGTTTCAAAGTGAGCATTGTGGTCTCTTCCAGGTGA  
>AT3G44290.1  
ATGGCAGCTGCACCACCGATCGAGCCGGCGGTGACGACGACGTTCCCTGGCTTCAAATTCTCCCCACCGACATCGAACT  
TATATCTTATTACTTGAAGA  
GGAAGATGGATGGTTTGGAGAGATCTGTTGAGATTATACCTGAGGTTGAGATTACAACCTCGAGCCTTGGGATTTACCT  
GATAAGTCTATCGTTAAATC  
GGATAGCGAATGGTTCTTCTCTGTGCTCGCGGTAAGAAGTATCCCCACGGTTCACAGAACAGAAGAGCAACCAAGATAG  
GATATTGAAAAGCCACAGGA  
AAAGAGCGTAATGTGAAGTCAGGTTCTGAGGTCATTGGAACAAAGAGAACGCTTGTATTCCACATTGGCCGCGGCCAAA  
AGGAGGAAGAACGGAATGGC  
TTATGCATGAGTACTGCATGATTGGAGTATCACTGGATGCTCTGGTTATTTGCCGACTTAGGAGGAATACTGAATTTCAA  
GGGAGTACAATTCAAAGCC  
ACCACAACCAAGTTTACCCTGATAAGCACGTAACCTTGCAGAAATGAAGCTATTTCCAGAAAGTATTTATGGTTGGGAAA  
CTATGGTTGATTTCTACTTA  
TCAAGTGAGTCAGGGCAAGAACTACTTAGTAAAATAGCAGAATCTCACAATCTTCACAAAATCCACAGGTTCTAGTGA  
AGAAGATTTCTATGCCGATA  
TACTGAGGGATGAAATAGTAAAGCTAGATGATCCGGCGGTATCCGGTAATACACTGATCAATGTACCAAGGCTTCAAACA  
GAGTCCAATACCACAAGAGT  
ACTACCTTTACCTGACATGGTAGACAAAACAAATGCAATCGTTGCTACAGAACTACCATTACAAAATGACTGAGGAGAAG  
AGAACAACATATCCATGTCA

AATTGCTTTATCGGTATCTACTCGATTAAGTCTATAAACCGAGCGCGATGGGACGTTGTTGTTTGGTTACTCGTTATGAT  
AGCCGTGTTGGTGTTTTATT  
TAGTGTGA

>AT3G49530. 1

ATGAATCAGAATCTTCATGTATTATCAATGGATTTCGTTACCAGTTGGATTAAGATTCCGTCCAACAGACGAGGAGCTAAT  
CCGTTACTATCTCCGTAGGA  
AAATCAACGGTCACGATGACGACGTCAAAGCTATCCGTGAGATCGATATTTGCAAATGGGAACCTGGGATTTACCTGAT  
TTTTCTGTGATCAAACTAA  
AGACTCAGAGTGGCTCTACTTCTGTCCATTGGATCGGAAGTATCCGAGTGAAGTAGACAGAACCGGGCAACAGTTGCAG  
GGTACTGGAAGCCACAGGA  
AAAGACCGGAAGATAAAAATCCGGTAAGACTAACATTATTGGTGTGAAGAGAACTCTAGTTTTCCACGCGGGTAGAGCTCC  
TAGGGGGACACGAACCAATT  
GGATTATTCATGAGTATCGTGCCACGGAGGATGATCTTAGTGGTACCAATCCTGGCCAGAGTCCGTTTGTATATGCAAA  
TTGTTCAAGAAAGAAGAACT  
GGTTTTAGGGGAAGAAGATTCGAAGTCAGATGAAGTTGAAGAACCTGCTGTCTCGTCTCCAACGTGCGAAGTACTAAGT  
CAGAAGTATCTGAGGTAATT  
AAAACAGAAGACGTGAAGCGTCATGACATAGCAGAATCTTCTCTGTAACTCTCTGGAGATTCTCATAGTGATGCTTGTGA  
TGAGGCTACAACCGCAGAGC  
TTGTAGATTTTAAATGGTATCCGGAATTGGAGTCCCTAGATTTACGCTGTTCTCTCCATTACACTCTCAAGTCCAATCT  
GAGCTTGGATCCTCTTACAA  
CACATTCCAGCCTGGCTCGAGTAATTTTCAGGGAACAACAACAGCTTCCAAATCCAGACTCAGTATGGTACAAATG  
AAGTAGATACGTATATATCT  
GATTTTCTTGATTCGATTCTCAAGAGCCCAGACGAGGATCCAGAGAAGCACAAGTATGTTTTGCAAAGTGGTTTTGATGT  
TGTAGCACCAGATCAGATTG  
CGCAAGTGTGCAACAGGGCTCAGCAGTTGACATGAGCAATGATGTTTCAGTGACGGGTATCCAGATTAAGAGTCGCCAG  
GCACAACCCTCAGGTTATAC  
CAATGACTATATAGCGCAGGGAAATGGTCCAAGAAGGCTGCGTCTGCAAAGTAACTTTAATGGCATTAAACACGAAGAATC  
CTGAGCTTCAAGCTATAAAG  
AGAGAGGCTGAGGACACGGTTGGAGAAAAGTATAAAGAAAAGGTGTGGAAGCTAATGAGATCAAAGAACGTGACCGGTTT  
TGTTGTTTTAAAAAGATTACGT  
CGGTGAAATGTTTCATATGGAGGACTCTTAGGGCGGCAGTAGTTGCAGTTGTGTTCTTGATGTCAGTCTGCAGTCTAACCC  
GTCGACTTCAGAGCATCTGC  
AGTGTCTCTGA

>AT4G35580. 2

ATGGGTGCTGTATCGATGGAGTCGCTTCCTTTAGGTTTCAGATTCAGACCTACCGATGAAGAGCTCGTCAATCACTACCT  
CCGTCTCAAGATCAACGGAC  
GTCACTCCGATGTCCGTGTCATCCCTGATATCGATGCTGCAAATGGGAACCTTGGGATCTCCTGCTCTCTCGGTGATT  
AAGACGGATGATCCAGAGTG  
GTTCTTTTTCTGCCCTCGTGATCGGAAATACCCTAATGGTCATCGCTCTAACAGAGCAACTGACTCTGGCTATTGAAAAG  
CTACTGGTAAAGATCGTAGC  
ATCAAGTCTAAGAAGACTTTAATCGGTATGAAGAAGACTCTTGCTTCTATCGTGGACGAGCTCCTAAAGGTGAGCGGAC  
TAATTGGATTATGCACGAGT

ATCGTCCACTCTTAAGGATCTTGATGGCACTTCCCCTGGCCAAAGCCCTTACGTTCTTTGTCGCCTCTCCACAAGCCT  
GATGATCGGGTTAATGGTGT  
CAAGTCCGATGAAGCAGCTTTTACGGCCAGCAACAAATACTCACCTGATGATACATCATCTGATCTTGTTCAAGAAACAC  
CTTCCTCTGATGCTGCTGTT  
GAGAAACCATCAGATTATTCAGGTGGATGCGGTTATGCTCATAGTAATAGTACCGCAGATGGGACAATGATTGAGGCACC  
TGAAGAGAATCTTTGGTTAT  
CTTGTGACCTGAAGATCAAAGGCACCACTACCGTGTATGGATTCTATATATGCTGGTGATTTCAGTTACGATGAGATT  
GGATTCCAATTTCAAGATGG  
TACCAGCGAACCAGATGTATCACTAACAGAATTGTTGGAGGAGGTGTTCAATAACCCTGATGACTTCTCTTGCGAGGAAT  
CGATCAGTCGAGAGAATCCA  
GCAGTCTACCAAATGGGATATTTTCATCTGCTAAAATGCTGCAGTCTGCAGCACCAGAGGATGCTTTCTTCAACGACTT  
CATGGCTTTCCTGATACAG  
ATGCTGAGATGGCGCAATTGCAGTATGGTTCAGAAGGTGGAGCTTCTGGTTGGCCAAGTGACACTAATTCATACTATAGT  
GATTTGGTTCAGCAAGAGCA  
AATGATCAATCATAACACAGAGAACAACCTCACAGAAGGGAGAGGGATAAAGATCCGGGCTCGACAGCCTCAGAACCGGC  
AGAGTACAGGATTGATAAAC  
CAGGGTATTGCTCCAAGGAGAATCCGCTGCAGCTGCAGTCTAACTCTGAAGTAAAAGAACGAGAGGAGGTGAATGAAGG  
ACACACTGTTATTCCCGAGG  
CCAAAGAAGCTGCAGCTAAATACTCAGAGAAGAGTGGTTCTTTGGTTAAACCTCAAATAAAGCTCAGGGCGCGGGAAC  
ATAGGCCAAGTAAAAGGAGA  
GAGATTTGCAGACGACGAGAAGTTTGTGTTACAGGTACAGGTGCAGAGCAGAAAGAGACGAGGAGGGAAGCGATGG  
AAGGTGGTTGCAACGGTAAT  
GGTGGCTGTGATGGTTGGGGTAGGGATGGGTATATGGAGGACACTGGTGAGTTCATGACACATGAGACACAAAGAGAGAG  
AGAGAGAGAATCAAATGTAG  
TTTAA

>AT5G04410. 1

ATGGGTCGTGGCTCAGTGACGTCGCTTGCTCCTGGGTTCCGTTTTACCCGACGGATGAGGAACTTGTTTCGCTACTACCT  
TAAGCGTAAGGCTGCAACA  
AACCTTTAAGTTCGATGCTATTTCCGTCACCGACATATAACAAGTCTGAGCCTTGGGATCTACCAGATAAGTCAAGCTG  
AAAAGTAGAGACTTGAATG  
GTACTTCTTTAGTATGCTGGATAAGAAGTACAGTAATGGTTCGAAGACGAATCGTGCTACGGAGAAAGGGTATTGAAGA  
CGACTGGGAAAGATCGGGAG  
ATTGTAATGGTTCAAGAGTCGTTGGGATGAAGAAGACACTTGTATTATCACAAGGGTCGAGCTCCTCGTGGTGAAGGAC  
CAATTGGGTTATGCATGAGT  
ATCGGCTTCTGATGAGGACTTGAAGAAAGCTGGTGTGCCACAAGAAGCATATGTGTTATGTAGGATATTCCAGAAAAGT  
GGTACGGGTCCTAAGAATGG  
GGAGCAGTATGGTCTCCTTATCTTGAGGAGGAGTGGGAAGAAGATGGAATGACTTATGTACCTGCTCAAGATGCTTTCA  
GTGAAGGATTGGCTTTGAAT  
GATGATGTTTATGTCGATATTGATGACATTGACGAGAAGCCCGAAAATCTGGTGGTCTATGATGCCGTTCTTCTACC  
TAACTATTGTCATGGGGAAT  
CAAGTAACAATGTTGAATCAGGCAATTACTCAGACTCTGAAAATTACATTCAACCAGGAAACAATGTTGTCGACTCTGGT  
GGTACTTTGAACAACCAAT  
TGAAACTTTTGAGGAAGATCGGAAGCCTATTATACGGGAGGGTAGCATTACGCTTGTCTCTGTTCCAGAGGAACAAA

TTGGCTGTGGTGTGCAAGAC  
GAAAATGTGGTGAATCTGGAATCTTCCAACAATAATGTGTTTGTAGCTGATACATGCTACAGTGACATTCCTATTGATCA  
TAACTATTTACCCGATGAGC  
CATTTCATGGATCCTAATAACAATCTTCCACTCAACGATGGTCTGTACCTGAAAACGAATGATCTCAGCTGTGCTCAACAA  
GATGATTTTAACTTCGAAGA  
TTATCTCAGCTTCTTTGATGATGAGGGTTTACTTTTACGATTCTCTATTAATGGGACCTGAAGATTTTCTTCCAACC  
AAGAAGCCCTTGACCAGAAA  
CCTGCCCTAAAGAATTGGAGAAGGAGGTCGCAGGAGGCAAAGAGGCAGTGGAGGAAAAGGAAAAGTGGCGAAGGATCTTC  
TTCAAAAACAAGATACAGATT  
TCAAAGACTTTGATTCAGCTCCGAAGTACCCATTTCTCAAAAAGACGAGCCACATGCTTGGAGCCATTCCTACTCCATCT  
TCATTTGCTTCACAGTTCCA  
AACAAAGGACGCAATGCGTCTACACGCAGCACAATCTTCTGGTTCAGTTCACGTGACTGCAGGTATGATGAGAATATCAA  
ACATGACTCTAGCAGCGGAC  
AGCGGTATGGGCTGGTCATATGACAAGAACGGTAACCTCAACGTAGTCTTTTCATTTCGGGGTAGTCCAACAGGATGATGC  
GATGACTGCCTCGGAAGCA  
AGACAGGAATTACGGCGACAAGAGCTATGTTAGTCTTCATGTGTTTATGGGTTCTCCTACTCTCTGTTAGCTTCAAATA  
GTAACCATGGTGTCTGCTCG  
GTAA

>AT5G22290. 1

ATGGACACGAAGCGGTTGGAGTTTCTAAGGATACGGCGGTCGATGGAAGCGTCGACGGTGTTCCTGGGTTTAAATT  
CTCGCCGACGGATGTGGAGT  
TGATTTTCGTATTACCTGAAGCGGAAGATGGATGGCTTGGAGAGGTCCGTTGAGGTTATACCGGACCTTGAGATTTACAAT  
TTCGAGCCTTGGGATTTACC  
CGATAAGTCGATTGTGAAATCTGATAGCGAGTGGTCTTCTTCTGTGCGCGTGGGAAAAAGTATCCACATGGTTCACAGA  
ACAGGAGAGCAACGAAGATG  
GGATACTGGAAGCAACTGGGAAAGAGCGTGATGTGAAGTCTGGTCTGAGGTCATTGGAACAAAGAGGACGCTTGT  
CCATATTGGTCGTGCACCAA  
AAGGCGAAGAAGTACTGGATTATGCACGAGTACTGCGTGAAGGAGTATCTCTGGATGATGCTATGGTGTGTTGCCGG  
GTTAGGAGGAACAAAGAATA  
CAATAGTGGTACAAGTCAGAAGGCACCAAAGCCAAATTCATCAGCCGAGAAGCATGCGAAAGTCCAAATGGCGCTACGA  
GTTTCAGGGAGCCCGTCTGAT  
TGGGACAACCTGGTTGATTTTACCTAGCAGGTGAATCAGGGGAGAACTACTCGCTGAGATGGCAGAGTCATCAGAAAA  
TCTACAGGTGGATAATGACG  
AGGATTTCTTTGCGGATATCCTAAGAGACGAAATCATCAATCTCGATGAAGCGGTGATGACAGGGAACACACCAAACGAA  
GTGCCAACACTAGAATCAGC  
ATCAATGGAGATAAGGGTACTTCTTTACCAAACATGATAGACAAACAAATGCATCACTGTTAGAGGAAAGACCATCAC  
AGAAGAAGAAAGGAAAAGAC  
GCCACGGAATCATTGTCGAGCTGCTTCGTGGGTTTATACTCGATCAAATCAGTGAACAAGGCACGATGGGATGTTATTAT  
AGGTGTAGTGGCTCTGATAG  
CAATGTTGTTTATCTAGAATAA

>AT5G24590. 2

ATGAAAGAAGACATGGAAGTACTATCGCTCGCTTCACTACCGGTTGGGTTTCAGATTTAGTCCAACGGACGAAGAGTTAGT



CCGGTACTATCTCCGGCTCA  
AGATCAACGGTCACGATAACGACGTTAGAGTAATTCGTGAGATCGATATCTGCAAATGGGAGCCTTGGGATTTGCCTGAT  
TTTTCTGTGGTGAAGACAAC  
AGACTCAGAGTGGCTCTTCTTTTGTCCCTTTGGACCGGAAATATCCGAGTGGAAGTCGAATGAATAGAGCTACTGTGGCTG  
GATACTGGAAGGCGACGGGA  
AAAGACCGTAAGATCAAATCAGGAAAGACTAAGATTATAGGTGTTAAGAGGACTCTAGTGTTTTATACAGGTCGTGCTCC  
TAAAGGGACACGAACTTGTT  
GGATTATGCATGAGTATCGTGTCTACTGAGAAGGATCTTGATGGAACAAAGTCTGGCCAGAATCCGTTTGTGTTTGTAAAG  
TTGTTTAAGAAGCAAGATAT  
TGTAACGGAGCTGCTGAACCAGAAGAGTCAAAGTCATGTGAAGTTGAACCAGCGGTATCGTCTCCAAGTGTGTTGGACG  
AGGTTGAAATGTCTGAGGTA  
TCTCCTGTTTTCCCTAAAACAGAAGAGACTAATCCTTGTGACGTCGACAGTCTTCTTGTAAATCCCCAGCGAATGTGC  
TAGTGGATACTCTGTCCCTG  
AGGTTACAACCACCGGGCTTGACGATATCGATTGGCTCTCGTTTATGGAGTTTGATTCCCCGAAGCTGTTCTCTCCGTTG  
CACTCTCAGGTGCAATCTGA  
GCTCGGTTCCCTCTTTCAATGGCTTACAATCTGAGTCTAGTGAATTGTTCAAAAACCACAATGAGGATTACATTCAGACTC  
AGTACGGTACAAATGATGCG  
GATGAATATATGTCCAAGTTCTTGGATTCTTTTCTTGACATTCCTATGAGCCAGAACAGATCCCATATGAGCCACAGAA  
TCTTAGCTCATGCAACAAGA  
TCAATGATGAATCTAAGAGAGGAATTAAGATTAGAGCTCGACGAGCACAAGCCCCGGGTTGTGCTGAGCAGTTTGTAAATG  
CAGGGCGATGCCTCAAGAAG  
GCTGCGTCTCAGGTTAACCTTAACAGCCACAAGTCAGAACTGACAGTACACAACCTTCAATTTATCAAGAAAGAGGTTA  
AGGACACAACAACGAAACT  
ATGACGAAAGGATGTGGAATTTTACAAGATCAAAGAGCAGGACTAGTTTCATATTCAAGAAAATTGCAGCCATGGGATG  
TTCATACAGAGGGCTTTTCA  
GAGTCGGTGTGGTAGCGGTTGTGTGTGATGTCCGGTCTGCAGTCTAGTCGCATAA  
>Bradi1g52480.2  
ATGGGAAAGCAGTGGCGATGTCTGCGGCGGGGAGGTTCTGCCGGTGGGGTCCGCTTCCGGCCGACGGACGAGGAGCT  
GGTGAGACACTACCTGAAGG  
GCAAGATCGCCGGCACCCGGACCTGCTGGTATCCCCGACGTGGACCTGTGAGCTGCGAGCCATGGGACCTC  
CCTTCCAAGTCCGTCATCAA  
GTCCGACACCCGGAGTGGTTCTTCTTCGCCCGCCGACCGCCAAAGTACCCCGCAAGAGCCCCGCTCCAACCGCT  
CCACCGCCCGGCTACTGG  
AAGGCCACCGCAAGGACCGCTCATCCGCTCCTCCTCCAACAACAACAAAACCTCATCGGCATCAAGAAGACCCT  
CGTCTTCCACCGCGCAGGG  
CTCCCCGCGCCTCCGACCCCATGGATCATCCACGAGTACCGCGCCGCGAGCCAGCTTCCAATCAGGCCGAAACGGT  
AGCTTCGTTCTTACCGCT  
GTTTAAACAAGCAAGACGGCGAGACCCGTCAAATCGTCTCGAAGCGACCTGCAGAATGGCGGTGATGACCAAGATAAGG  
CCACCACCTCCATGACATCT  
GATTTGAGCCTGCTCACTGCAACCAACCAACTACTACTGATCACTCCATGACCACCAATCTTATTACGGCTGTGACGG  
TGACAGAGTCTCTCATGAAG  
ATGCTTTTCTGGATGTGTTAACCAGCTCCAGACCTACATGCCGACCAAAGATACGATGGATTCCCTAACATCAGTTCT  
CCGATGCGTCTTACACAGA  
TCATCCTTTCGTTGGCAACATGGGTGACCAAGACTTCTCGGCATATTTTGACAGTATCATAGCTGAGCAGAATATACAAG

ACATGTTGCTTCATCCAGAT  
TATGCCGAGATGGATAAGCACCCCTGCTGGTAACACCGAGTCCGATCCCCTGACTAGTTACATCGACCGCAACTCAA  
CAGCATGGCACCCTTGAGG  
ATAGTTGGAGAGAAGACTATTATGATCAGCGTGCAGATGACACAGATGCTACCCGTTGCCTGTCTGCTCTCAGTACTG  
CAATCAGATACAAGCGGTCA  
TAATCATGAAACAAGACCCCAAACTAACATTATGTACGGCGGAGCAAACCTGGCATCCAATGTTATAGCCAATGTCAAT  
TACCACTCGCGCTCGATCCT  
CAAAACAGAAATCATCGCACATTAGTGGAGACTTGTGGAATCCTTATGCCCAACTTGTGGACTCTATGTTAGAACCGAG  
CAGCAGTGACATGATAAATT  
CAGAGGCCTCAATGGACAAGGGGGTGGGCAGTACCACCTTCAATGCAGCAGTCTGAAGTCAAGATTTCAATTGATTG  
CAGCAAGGGACAGCAGCAAG  
AAGGGTCCGCTTGTGTGTGGTGTTCAGAGGGCACCAGCCTCTCAGCTTATAATAACTCCTCATTTGAAAAGTGAAGATG  
AAGCTGGATCATGTTGTAGC  
ACAGGAAGTCTTCCAATAGCCATGATGAGGATTATGCCAATGCAGGCTCCCGAACTATGGCTGGAGATATGATGCATAT  
TGAGGACACAGGGCATATCC  
CTACTCAAGTAGCTTCTTTAGTAAAAGTTACAGACAAGCTCCAACATTTATCGTTGAGTGAAGACATGCCGGAACACATT  
AAGATGCCTCGTCGTCATGG  
AGCCGGTCTCACACAGAGGCTCAAACATGATTCTGCTCAGAGTGTGCACCAAGACCTCCTGCAGAACAGCAACCATGTGC  
CTGGAGAGTCATCTTCAGAA  
ACAAACAGGACGATCAACTGGTTCTGTGTCGCGGTGCTCTGGCTGGCTCTCCTGGTGATGGCCCTTTGCTTGTCTGGT  
TGGTGTATGGAGTTCGCTGA  
ATTACTGGCAGATGTAA  
>Bradi1g77217  
ATGGCACCGGTGAGTCTGCCTCCGGTTCCTGGTCCACCCACCGATGAGGAGCTCATCATCTACTACCTTAAGAGGAA  
GATCAATGGGAGACAGATAG  
AGCTCGAGATCATTCCAGAGGTCGATCTTTACAAGTGCAGCCATGGGATCTTCCAGAAAAATCATTCTTCCAAGCAAA  
GACCTGGAGTGGTACTTCTT  
CAGCCCTCGAGACCGCAAGTACCCTAACGGGTCTAGGACAAACCGCGCAACCAAAGCCGGTACTGGAAGGGCAGGGGA  
AAGATCGCAAAGTGAACCTG  
CAGAGGCGTGCAGTTGGTATGAAGAAGACCCTGGTGTACTACCGTGGCCGAGCCCCACATGGTTCTCGCACGGACTGGGT  
CATGCACGAGTACCGCTCG  
ACGAATGCGAATGCGAGATCGACAATGGCTTACAGGATGCATATGCACTATGCCGATTTTCAAGAAGACAGCTCCGGGG  
CCAAAGATCATAGAGACTA  
TGGCGCAGTACAGTACCATGCCGAGCAGCCTCAGTGGGGGACAAGCTGCAGCGTCGAGCGCTCGCCGACGCTGGATGTTT  
CGTGCATGGAAGAGGCGGT  
GCCGATGAGTTTGAACAGCAGCTTCTCTTTCCCGACGGAGGCGGCCAATGGCGTCCAGCTCCATGCACGGTGGCTG  
TGGGTTCCGGATGCCGATGA  
TGAGCGCGGTGCACCTCAGGAGGACGGCAGATGGATGCAGTTCTCAGCGAAGACGCCTTCAACGCCACCAATCCCTTC  
TTCATGAACCCTGCATCTGC  
CTCCAACCTTTTCATGCTTCCATCCAAGGTGGATGTGGCACTAGAGTGTGCAAGGCTGCAGTACAGGCTCGACCTGCCTC  
CACCATTGGAGGTGGAGGAT  
TTCCACAGGACGTCAGCCTCGACACGAAGACGGGCATCCTCCGAGCAACCCCAATGAGGTTGACATCCTCCAGGAGTT  
CCTGTCAAGTGGCCTCAGCGT  
CGCAGAACTGATCAATGGCAGCAGCAGCTACACTGAGACGTGGTTAGGTGGTGCCGGCAGGACGCGCCGGCAAC

CACTACATGAACGAGCTGTC  
CTCTCTCGTCGATCTCGGGCGACCAAGGCGAAGGAGGAGGCCGACAATTTCTACCAGCTGTGCAGCATTGGTGCCTCGA  
TGACGAGCCCGATGAACCG  
GCAAGGCTGGTTGAGATTAGTGACATGGAGGAGTTCAAGGAAGAGAAGAGCGGGTGGAGAACCTCAGAGGTGTCAAGCT  
GGTGAACAATGACCTCGGAG  
AGATTGTTGTAGAAGGAGATGAAAACAATCAAACAGAAGTCATCACGCATTATCCTATAAAAAGATGCTGCAGACACATCA  
GGAGAAGCCGGTCATCACCT  
GACCGATGCCACTGACGCAGTCGGCATTGACGACACGGCCCCGATCTTCTCGCAGTCTCAGCCTGACGACTTCGCTATCA  
TCGCTGCAGCTGGTTCCAT  
GACGAAGAAGCGAAAATGCGTCCCTGGATCTGTACGACAAGCAGTTGTGACGTCCAGCACGGGCTCTTCGTCTCACG  
GGTTGGCGCGGAGACGT  
TCTTCCACCGTGTGAGCCGCTAACAAGGTCAGCTTCCACCTGAATCCAGCAGCGAACAGCAGCGTCGGCGTCGGCAAG  
GCGATCTCCGAGAAGATCCA  
TTGTTCTTATCATTATCTCCCGTCACGTCCAAAGTTAGCGGTAGCAACAAGGTTTCTTCCATCTTCAGCAAGGTGAAGG  
CACTCGTCAGGGACAAATTC  
ATGGCGAGAAAACCGTCATTGTGCTTACCGAAGAAGGTTCTGAAGAAACGGCGACAGTGAGTGAGCTGCTGCAGATCGT  
GTCACCTCTTGGCAGCAC  
CCAGCAGCAACAAGGAAGTTACTGAGCAAGGAGATCTGGTGGCCAGGAAGAAGGCCAAGGAACCGGTGATGATGAAGCCG  
CCGGTATGGGTTGCGATGA  
TGGGTGCAGCAATCCGTGGCTTCCCAAGAGGAACAACAATAAGGGCATTTCGGCATGTTTTTGAGTGGGAAATGGGCGT  
TTCTAACCTCTGCATTATTG  
GCCATCCGCGCCCAGCTGGCTCGTGCAACTGA

>Bradi2g09530.1

ATGGAACTTTACGTAACATGACCCTGCCACCAGGATTTGGATTCATCCAAAAGATACTGAACTCGTTTCTCACTATTT  
GAAAAGGAAAATACTTGGTC  
AGAGAATTGAGTATGACATCATACCTGAGGTGGATATATAACAAGCATGAGCCATGGGATTTACCTGCAAAGTGAATGTT  
CCAACCCAGGATAACAAGTG  
GCATTTCTTTGCTGCTCGAGACAGAAAGTATCCTAATGGTGTCTGGTCAAATAGGGCAACAGTTGCTGGGTATTGGAAGT  
CTACTGGAAAAGACCGGGCC  
ATTAAGGTGGATAAGCGAACCGTAGGAACAAAAAACTCTAGTTTTTCATGAAGGTCGACCTCCCACTGGAAGACGTAC  
TGAGTGGATTATGCATGAAT  
ACTACATAGATGAGAACGAATGTCATGCCTGCCAGATATGAAGGATGCCTTTGTTCTTTGTAAAGTTACTAAAAGAGTT  
GACTGGACATCAGAGAATGG  
CAATGAGGTGGGCAACAGTGACCCTCATCCACAACAGTCAAATGTTGCTGCTACCTCAGCTGTCAGTGTGAACAACCAG  
ATGCTGCTGCTGAATCAGTT  
ATCGGTGGTGAACCTACCGAATGATCTTGCTACTTCAGCTATAACTGCTCAGACAACAACCTCCAGATGGTGTGACGAAAT  
ACAAGGATGGCTGGAAGGAA  
TGATTGATTTTTCTTTAATTTCTGCAGTGGATCCTGTTTCTGCTGGCCTGTCTCTGGATGAACAAAACGCTGAATCATCG  
AACCGTGGTGTATGGCTCC  
AAAGGTGGAACGAGACTATGCCAGTCCTAACCGTTTGTGGTAGACGATGATTCAGACTACCTGTTGCCAGATGATATTT  
ACAACATGTTGTCTCTGGT  
AGTGATGACTTCATGCCATGGCATACTGAGCAGGAGCTCTTGCTTTTGTGCTGACCAAACATACTCCATTATGGGTGTGGA  
CCCCTTACTCTGCCAAGCA

ACTTTGCGGAAGGAACTCAGAATGAAGAGCTACAGTTACCTCTGGAAATTAATGAGCCTAATCTGTCAAATGAAGCTGCT  
GATAATGGAGTTATAATACG  
GACGCGTAATGGAAAAACCTGCAGAGAGCATTCCACCATACAGGAGTAACAGGACTAGACTTCAGCATAGTATCAACA  
GGATGGTTGTGAGCAGCTCT  
GAATCTATAAACGAGACCATGAAGTTCGTTGACAACGGTGGTCGCTTTGATCTCATGACTAATGTTGAGCACAAGAAGAA  
ACATGTGCGTGATGTTACTA  
CTGTCAGGCAGCGGGATGCAGGGAAGTCAAATAGAAAACAAAACAACCAAGGATTTTTTCAGGGGTGCCGAAAGTCAGTT  
TGGGGCTGTTTCAGCAGCTGG  
ACTGAATATACTTGTGCTCTTTGCATGGTGGGAGTTGCTGTAGCAATACTGCATCATGGATGTCACCGCACTGGGATCA  
GCTTATAG

>Bradi3g12470

ATGACCCCTCCCTCCTCCTCGTCCCCCTCCGCCCGCGGCAGCGCGCGCGCGCGCGCGCGCGGAGCCGGACGACCCAC  
CTCGCTCGCCCCGGGCTCC  
GTTCCACCCACCGACGAGGAGCTCGTCTCCTACTACCTCAAGCGCAAGGTGCTGGGCCGCCGCTCAAGGTGGACGCC  
ATCGCCGAGGTCGACCTCTA  
CAAGCTCGAGCCATGGGACCTCCCCGCCAGGTTCGCGCCTCCGCAGCCGCGACTCCCAGTGGTACTTCTTCAGCCGCCTCG  
ACCGCAAGCACGCCAACCGC  
GCCCCACCAACCGCGCCACCGCCGGCGGGTACTGGAAGACCACGGGAAAGGACAGGGAGGTCCGCCATGGCCCCATGGT  
TGCTGGGATGAAGAAGACAC  
TCGTCTTCCACTCCGGCCGCGCCCCAAGGGCGAGCGCACCAATTGGGTCATGCACGAGTATCGCCTTGAGGGCGACGGC  
GCCGCCGGGATCCCGCAGGA  
TTCATTTGTGGTATGCCGGATCTTCCAGAAAGCTGGCCCTGGTCCACAGAATGGAGCACAGTACGGAGCTCCCTTCGTTG  
AGGAGGAGTGGGATGCCGAT  
GATGTTGGTCTGCTGCCACTGGAAGGAGATGCGGACGTCGATGCTGAGCGTGAGGCTCCTGGTCTATGGAGAAAGGATA  
TCTTCAGATGAGTGACCTCA  
TTCAGGACTGCGGCGGTCAAATGAGAATGGTGGTGTGCTTTGCCAGTTTCTGACAGTTCAAATAATAGCAACCATTCT  
GAAGTTGCAGAAGGAAATTC  
AGGGGACATTTGAATGACCCAAATCTTGGTTCTAATTTTCTTCAGCATGTTGATCCTGGAGAACAAATAGCCTAATGC  
TGAATGGAAATATGTTATCT  
AATGCCAATGGTGGAGATCTTTTAAATAGTTCTAGCCCCAGTAATGCGTTCATGGAGCTGAAGGATTTAGGGTATCCGTT  
AGGCAATGATTCTGGTGGTT  
CAGACTGGAGAACACCTCACAGCTTCGAGCATGTAATGGGGCTAACAAATGAGGCTCCTCCCATCACTGGTGAACATATT  
TTCCAGCCAGACGAGTTGGA  
ACAGTTGTTGCAGTCACTGCAAGATGACTCCCCTTTGGGCTCAACTATCACTGATGTCCACAGTCTTCTTAACAAATT  
CAGTTCAGCCAGAGGATGAT  
TTTCTGATGTTCCATGATGCACCCTTTGATTCCACAATGTTCAATGATGGTTTTGGGCAGTCTGCTGGATTTCTTGGTTC  
CCCAGTAACGAATCTATCTG  
GTATTGGCATGGTGGATGATGGTATGCCATACTACGATGCAATTGATGATAACTTATTTAATGATATGATGTGCTCTGGA  
CAGCAGTCAGCTGGTAGTGG  
CTCCCATCTTTTAAATGGGCCAGTCTTAGCCAAGAGGTCAACAATACCACCTATACATATAGTCCAACCTAAAAGGTTT  
TAGAACCTAATTTGTAGTT  
GGTGCCCCGTCATCTGCTAGGTTACCTGAAGCTGGTAGTCAGTTAAATTGTAATTTACCAGATGCCCTGCTAGGAGAGG  
CGCTATTGTAAACCATTTTG  
TAAAGGTGTTGGATTCCATCACCGGCCCAATGCTTTTGCATCAGAGTTCCCGCCAACCTTCGCAAATCCCTGGCTCCT

ATTTCTGGAGCACACCCTAA  
CACCATCAGTGTGTCTACTGAAGTAATCAGCATGGAAAAGGGAAGCCTAACCGTCGCTTCTCGACAAGACAAGTGGTCCT  
TCCAGAAGGGCGAAGACATG  
GAGCTGCTGTTCTCCACAGGCTCTGAGCCTGGAACCCGCATGCACTGCGGCGGTGCAACACCATAACTGCGGTGCTGAG  
GAGTGGCTTTTGTCTTTTCT  
TCTTGTCGGCAATAATGCTCCTAGTGAGCTGCGAGGTGGGGTTGTGCATCTACGGCAAGTAG

>Bradi3g16480

ATGACGGTGATGGAGCTCAAGACGCTGCCGCTCGGCTTCCGGTCCACCCACCGACGAGGAGCTCGTCAGGCACTACCT  
CAAGGGGAAGATCACCGGAC  
AGATCAACGCCGAGGTCGAGGTCATCCCCGAGATCGACGTCTGCAAGTGCAGCGGTGGGATCTCCAGATAAGTCTTTG  
ATCCGTTCCGAGGATCCAGA  
GTGGTTCTTCTTTGCACCCAAGGACCGCAAGTACCCCAATGGAAGCAGGTGCAACAGGGCGACAGAGGCTGGTACTGGA  
AGGCGACAGGAAGGACCGG  
ATCATCAAGTCCAAGGGCGAGAAGAAGAAGCAGCATATGATAGGCATGAAGAAGACTCTTGTTCCACCGGGGACGTGC  
CCCTAAGGGCGAGCGCACCG  
GGTGATCATGCATGAGTACCGTACCACCGAACCAGAGTTTGTAGTCCGGCGAGCAGGGCGTTATGTTCTCTATCGCCTG  
TTCCAAAAGCAAGTGGAGAA  
AAGTGAGCGCTCCAGCCCAGACGAAATGGATAGAAGTGGTACTCTCCACTCCATCTCGATCCACTCCTGACAATATGG  
AGGCAAATGAGGAAGCAATT  
ACACTGTTAAACAAGGAATCTCCTGAATCTGGTGTGCAAGGATGCCCAATTGACTTGCCAGGCACAGTTGAAACTCCAGC  
TGCACCGATTACAAGATGGC  
TTGCAGACAGAACTGATAACTTGGTGACACATGACGCAAACATTTTACGCACGCCATTTTCATGGTCATGTTGATGAAATA  
CCTAAGACTGGTCCTTTGGT  
TCAGCCAATGACCCACAGAAGAAAAATGTTGATTCTGAAGAATTCTTGACCTTTGCTGCCCCCATGTTACCGCATGAAG  
GAAATGATTTGTTCTGCAAT  
CCTTCTCTCAAGGACATTCATTTGATTTTGGTGGCAGTATGGCACCTGGTGATCTAGTGGAGAAGTTCTTGAATGAAGC  
AATTGCTGATCCAGAGGAGC  
ATTCGTCAACAGCATCAAAAAGTTCAGTATGATTCAGACAATGGGATTATGCTTCCAGAGTTAGAGAACAATTGGCCTATG  
CAGGGTGAATGCTAGATGA  
TCCATACTGGTTTCGAGAATATAAACTTTTGCCAGATGATACAACTCCACAAGTGGATATGAGAATACACCATTGC  
TTCCTTTTATTGGAGCTAAT  
CCTGACGAACCTTCAATGGATTCTGATCATGAGTCCATGCAAGATTTATTCAATACCATGGAAGATTCAAATGAGAAGAT  
GGGTGGATGGAACAATGGAT  
TTGGATTTAATCCATACATCAACAGTTACAGTCCACAATGCATCCAAACCATTTAGTTTCTCAACAGGGCTGTGCACAA  
AGGAGGTTACGGCTACAAGA  
TTCATTGTCTGCTGTAATATTGAAGTGAAGAGAGCATGACTAAAGATGAAGATGAAGTATCACATATTGTAACCTCGG  
AATATATGGGTGAATCTGTT  
GAGTCGACTGCAGATGGAGATGATGGTACTCCACAGGGGTTACCATTATGAGTCGACACCCTGCTCCAAGTACAAATGA  
GCCTTCCGATGGAGATGATG  
GTGACTCCACAGGCGTTACTATTATGAGTCGACGCCCTGCTCCAACTACAAATGAGCCTTCTGATGGAGATGATGGTATG  
TCCACAGGGGTTACTATTAT  
GAGTCGATGCCCTGCCCAAGTACAAATGAGCCTTCCGATGGAGATGATGGTATTCCACAGGGGTTAGTATTATAAGTC  
GACGCCCTGCTCCAAGTACA

GATGAGCCTTCCGATGGAGATGATGCTGAGTCAACAGGGGTTCTTATTATGAGCCGAGGCCCTGCCCTGAGTTCAGATGT  
GCCTTCTGATAGAGATGTTG  
CTGAGTCAGCAGGGATTACTGTTCTGAGCCAATGCCCTGCTCTAAGTTCAAGCTCAGATAGTTCAATTACTCAACAGGGG  
ACAGCAGGTCGAAGGTTGCG  
GTTACAATTGAACCTTAATGCGGGACCATGTTCCAGTATTGATGGTTCGTCAAGTTGCATGATAGACGAGAAGGAAAATG  
AACACAAAGGGATGAGAGCT  
GAGAATGAAGGAACATGGACACAAGCTTTTGTGACGATGCTAATTTTGTGGCAACAACCATGCCGATGAGCAAGATAA  
CATCCCTGAGCATGATGCTG  
CAAGGCCTGTTCCAGAAGCTAATTCTGTTACAAGGTTGCGGAAGACAGCGGAGAAAAGCGGCAATGAGAACAAACAGGAA  
TTAGGTGCCATCCACATGT  
GAGAGCACCAAGGAAGGGGGGCTTCCCAGCATACTATCTGGCCAGTTCTATCGGTGGCTCTGCTCGTCCTTGTGAGTG  
TTGGGATCTATGGATTGGCA  
TAA

>Bradi3g56080

ATGAGCCCCCTACTGCCAGACCACTCGCCGAGGTGCCGCTGGCGCCGGGCTTCGCTTCCACCCGACCGATGAGGAGCT  
GGTCTCCTACTACCTCCGCC  
GCCGCGTGCTCGGCCCGCCTCCGGATCGACGCCATCGCCGAGGTGACCTCTACCGCCTCGAGCCCTGGGACCTGCCC  
TCCCTCTCCCGATCCGAG  
CCGCGACTCGCAGTGGTACTTCTTCGCCCCCTCGACCGCAAGGTGGCCGGGGCGGGGCGGGCGGGCGGGCCCG  
GGAACAGGACCAACCGCGCC  
ACGCCGCGCGGTACTGGAAGACCACGGGAAAGACCGCGAGGTGTTCCACCGCGGAAGCGGTTCGGCATGAAGAAGAC  
GCTCGTGTTCATGCTGGCA  
GGGGCCCAAGGGCGATCGGACCAACTGGGTTATGCACGAGTACCGCTCCTCGACAACGATGGGCCTCAGGATTTGCAT  
GTGGTCTGTAGAATCTTCCA  
GAAACTCGGGACTGGACCACAGAATGGAGCACAATATGGAGCACCATACATGGAGGAGGAATGGGAAGAGGAGGATGATG  
CAATTGAGAATGCACCGGCC  
AGTGGTGCCTCACCGCAATGGCTGCAATCACAGATACGGCGAGCCCGAGTCAATGTGGAAGATGAGAATATGTATTC  
TAAACTAATGAGCTTGTGC  
AAACCAAGAAGTTCTTAACCCACCCGAAACGGCTCCTATCCTAGCTCAGGGTTTGAAGAGACTGATGAGGGAAGCTAT  
GGCGATGGAGTAATTTCTCT  
GGAGGAGATTTGACGGAACCTGTGTCAAATGTTAGTGTGAAAATATAGCGAACCTGAAGAGAAAACCTGCCATCGATG  
ACCACTTCACTTGTGAT  
TTGTCTGGCTACCAAGCCAAGATGATGGCTATGTTGCTCTCAATGGTCTATCATTGTAGGGACCCTTCAAATGGTGA  
TCATGCATATTGGCCTCTGA  
GAACTTATGGTCATCAAACCATGCCAACGGGACTCTTAATGCTGAGGAATTTTTGACACAGGAAATGATACCAACACA  
TATTCAGTAGAGCAGCAAAT  
TTGTCTTCGGATGGCCAAAACCTGATTTGCAAACCAATGGTTTGCAGCTCCTCAGCAAGTGGATGACAACATGGCAT  
TTTATGATGCATCAAGTACT  
CACAAATGGGTGGATGGAAGGATGATTTTGCGAATGCGAATGAGCTCCTCTACCAGCCAGAGAATGAACCTCTCTTTGA  
TGTGGATGATCTGATGGCTT  
ACTTTGATGCCACAGAGGATGATTTCAAGTTTGTATGTTGGGCTCTGTTGAAGGTCCAATTTGGCCACTTCTGAAAAC  
ATGCTGGACTTTGCCCAAA  
GGACGAGAACATGGATGGTTTACATTCGATGGGATCTCCAAAACAGTGCAAACGTTCAATATGTCGCATCTTCGTCTG

GTTCCCATGAGAATCTGTAT  
CTGGACACTGCGGTTGCAGACATACCAATGGATGATAGTGCTGACAAAAGTTTCGGAAAGCGCTTTGCCAGTGTGCTTGG  
CTCGATCCCAGCCCCACCTG  
CAATGGCTTCAGAATCCCACCAGCAACAGGAAAATCTGTTGCCCTCGCTTTCTGCTGTCAATGGCCTAGTTCGATTCAT  
GTCACTGCTGGCATCGTCCA  
GCTTGGTGGCTCACTTTTCAGTGGTAGCTCCGAACACTGGCCCCTGCAGAAGAATGGAGACTTCAGTCTACTCCTTTCCCT  
TCACAGTGGAGAGCGATGTG  
TCTACCAAATCCGTTGGTTTTGACGAGCCAGCTACACAGCTGAGCACGGTCCCAATGGTGTGCTGCGTGGTGGCTTGTACCT  
TTTCTTCGTTTCGGCGATGA  
TTCTCATGTTTCAGCTACAAAGTAGGGTCTGTATCTACAGCAGGTAA

>Bradi4g34022

ATGGAGAACCCGCGCCCCGGTGGCCGCCGGGCTCCGCTTCAGCCCCACCGATGAGGAGCTCGTCTCTATTTCTCAA  
GCGCCGGATCGCCTCCGGCC  
GCCCTACCCCTACATCGCCGACGTGACGTCTACAAGTCCCACCCTCCCACCTCCCCGAGAGGTGGCGCTGCGGACG  
GGGACAAGCAGTGGTTCTT  
CTGCAGCCGTCTGGACCGCAAGTACCCTAACGGCTCGCGCGGAGCCGACCACCGCCGAAGGGTACTGGAAGGCCACGG  
GGAAGGACCGCACCATCTGC  
AACGGCGGCGGGCCGTGGGGAACAAGAAGACGCTGGTGTACCACCACGGCCGCGCCCCGCGGGGATCGCACGGACTG  
GGTCATGCACGAGTACACCA  
TCCTCGGCGACGCGCTCCCGCCGACCGCGCAGGGACGCGAGGGGTACGCACTCTACAAGCTTTCCAGAAGAGCGGGGTG  
GGGCCAAGAACGGCGAGCA  
GTACGGCGGCCCTTCCGGGAGGAGGATTGGCTGGATGACGACGAAGGTGAGCTGCAGCTGCCTGTGGAGCCGCTGATC  
CTATCCCTACCACCGTCGCT  
AGTGATAGAGCCGGACAGTGGACGAGCAGATTGGGGATCTTGAGGCGCTCTTGCTGCAAAGTGGAAATGATCAGATAAA  
CATTGGACCACCGTCGGATT  
TGTCACGCCTGTTCTTCCAAGTTTTGTTTCAGCATGGTCAAAGTCAAGGTTGGCCTACTGCTGAGGATAACAGAAGT  
GAGGTTGCAGATGCTACCAC  
TAGCAGCAGGGCTATGTTAGTGGCGGACAATACGTGCACTGAACTTCCTTTTGGAGATCTTGAGGGGCTTTTGATGGAAA  
TATCGGATGAGCAACGGTCT  
GCCGAATTGTTCTCCGAATTCTCAAACCCGTTCCCAACTGCAGCTTCAGCATGATGACCAAGAGGCTTGGCTCAATGC  
TGACATGGAGGAGGTTAGTG  
TTGCAGATTATACAACTAGTAGTGGTGTGTGGAGACAGCAGAATGTACTGGCATTGAGCTTCCATATGGGGATCTTGAA  
GGGCTTTTGTGCAAATAGA  
GAATGACCAGGAAAATATTGAACCACTGACAGATTTCTCTTTACCAGTTTCTCATCACGAATGTCATCAGGTTGGCGTCG  
GAGATCTCCAAAGATGTCAT  
GGTGCTATGTTTCAGCTCTGTAGATCCTTCTTCTGCACTGCAAGGAAGCACCATTTTGAGCCACAATTGGAGCCAAGTAA  
CCAAATTGCACAGTCTGCTC  
TAACCTGCATGCCATTGAGTTGGGAAGCGAATTGCACTGAAGAAACAAGTGTGATGCAATCTGTGTCAGGGTTGGCCAGT  
TATGATGGTCAGGATTTCGCA  
TGAGGAGTTCCTTGAAATCAATGATTTCTTTGATTGAGAAGATATAGGACAGAGTATGAATTGTACTACAACTGAGCACT  
TGATTTCTGCATCCAGTGGGA  
ATGTTTGATAGTTTGGAGTATTCCGATGCTTCGATGTTTCTACCTGGCTCATTGACACAGCTGGAGTAGTACTGAAAA  
CCAATATGTTGATTTTGGTG  
ATAGTGATACAAGAGCCAGGGAGTTCAGTACACAGCTGAATTGTGGGCACACAACCAGGTCGCTCTTAATATGCAGAAC

CACATGAAGCACAATCATGT  
TGGCTTGTCTCACATGCATCAGGAACTGCCAATAATATAGTGAATGAGGAACCACTTAACCGAAGTCCAAATACTTCGC  
AATCATGGTTCAATTCAGCT  
TTGTCGACCTTGTGGATGCAGTACCTGCCAGTCCAGCTCTGGCTGCTGAAAGCAATGTTCTTAACAGAACTCCAACG  
CATTTCTAGCTTTAGGTCGG  
AACAAAGTTTCAAATGAATCAAGCGCCCCAGTTATTCATGTTAGAAGAGCTGCAGTTACCATGAGAGCCGCCGCTATCCAG  
AGCCACATCCTCGGGCGCGC  
GCCGCCGTCGCCGTCGCCGTACACACGCGGCCGCGCGCCGCCGCGGAGGCCGCGGGGCCCTCTCCGCCGCCAGGGCT  
CCCAGCTGAGGAGCGACCTG  
CTGCTGCTGCCGCTGCCACCGCCGTCCTGTGCGAGCTCGCTCTCCGTCTTCTTCTTCCCTCGTCCAGTGGGATTCTGG  
AACAGGGGAAGGTGCGGACG  
AGCTGCTCGAGGATTTGCTCCAGAAGCATGGCGAGGTTGTGTACAGCGCCGCCGTTGGGGCGGGGCTCCGGCCAATGAG  
GCCGACGAGGACGCCGAGTG  
CTGTCTTTGGCTGTTTCACTGGCTAAAGTTGCAAGTGAGGTCAAGGCTGCCGATATTCGTGTACTCTTCGTAAAGCCGA  
TTGTCTACTGGACTGAGTTC  
TTCATTATTCTCACTGCTTTCTCAAATGCACAGATTGAGGCCATCAGTTCCAAAATGAGAGACATCGGTGAGCAGCAGTT  
TAGCAGAGTTGCATCTGGTG  
ATACAAAGCCGAATTCATGGACTTTACTGGACTTTGGTGATGTGTCGTCATATATTTCTCCCCCGCAGCGAGAATTC  
TACAACCTTGAAGAGTTCTA  
TGGAAATGCCACACCATTGAACTCCCTTTCGAGACCCAGTTGCGGTGA

>Glyma. 02G222300

ATGGGTGCCGTCGTCGAGTGTACCCACAGCCGCGCACGGCGGTGCTGTCCCTGAACACCTTGCCGTTAGGGTCCGTTT  
CCGTCCCACCGATGAGGAGC  
TTATTGACTACTACCTCCGCTCGAAGATCAACGGAAATGGTGATGATGTTTGGGTTATTCGTGAGATTGATGTCTGCAA  
TGGGAGCCTTGGGACTTGCC  
TGATTTGTCAGTGGTACGGAACAAGGATCCAGAGTGGTTCTTCTTCTGTCCGAGGACCGGAAGTATCCGAACGGGCACA  
GGTTGAACCGAGCTACGAGT  
CATGGCTATTGGAAGGCAACGGGAAAGGATCGGAGGATTAAGTCTGGCTCCACCTTGATTGGAATGAAGAAGACTCTTGT  
TTTCTATAACCGTCTGTGCTC  
CCAAGGGGAAGAGGACCAATTGGGTTATGCATGAGTACAGGCCTACGCTGAAGGAGCTTGATGGTACCAATCCTGGACAG  
AATCCATATGTCCTTTGTCG  
ATTATTTAAGAAACAAGATGAGAGTCTTGAAGCTTCAAACGGTGATGATGTGGATCGGACTGCTTCAACTCCTATGACTG  
CCAATTACTCTCCAGACGAA  
ATACAATCTGATTGAGTCTGGTTCCAGCATCTTCTCACAGGTTACTGAAGATGATAAGCCTCTACCAGTATTTCTGA  
GAACTCTGAGGAAGCAATAT  
CCAACATTATAACCCCTGGTGAGATTCATAGTGACGGATGTAATGCTCCTGATGCACAAGATCAAATTGTAGAACCAGTT  
GCAGAGGAGGATCAGCCGTT  
GAACGTGGACATATTTTATGACCCAACAAATCTGCCATTAGACGACAAATATTCTCCCCTGTCCATGCACATTTCCCAA  
CAGATTTTTATTATCAAGCT  
AACAAATCAATCAGAACTTCACTATGGTACAAATGAGAATATTTTCAAGATTTTTTACTCGGTTGTTAATTGGGATGCGTT  
CTCTCATGATACTAGCAGTC  
TAGATCTGAGCTCATCTTCTTATTAATAATACGGACAATGGATCAGGCAGTACTCGGATGTTGAAATGACCAATATG  
CCACATCTGCAAGCATTACA  
TAATTATCCTAAGGAGGCAGTTGAGCAGAAGAGCAATGTGGGATTATTTTCAAGCAATTTCCAGATGGCGTTGTCAAATG



ATAGTACTATGGGCCAAGTG  
CACAAATATGGTCAACTATTGCGAGCAACCAAGAACTTTGATGCATTTGTTAGTGCTGATACTGGAATCAGAATAAGGAC  
TCGTCCAGGAAGAAATGAAC  
AGCCAAACATGGACACGATGGTACAATCACAAGGTATTGCACCAAGGAGAATACGATTGGGAGTTGTTAGGCGTCCGCTT  
GGTTCCCAGGATGGGAGTTG  
TGCTTGTGCCCCAGAAGACCATAATTCAAAAACCATCATTACTGCAGAGAAAAAGCTTCAGAATCAGAAAAACCATGCTG  
CCGATGGGAGTTCCACTGTT  
TCTGACATGAGTTCCACTGTTACAGATGATGTGGATGAACCAGAGGAGGCATCTCCCGAGTCAACCGACCTAAGAAACAT  
TAGTGAGAAACATGTTGCAA  
CTGCAGAATCCGTGCGAGGGTCAAAGTCCTTCTAGTGAACAGAAGGGTCCACTACACCTCAAAGGTTTCTCTAACCGT  
GCCACGTGGTCTAATGTTCT  
CGCAGTTTCTGCCGCTGTATTGGTCTCAGCAATACTCCTTGTTAATATATGGGCATATGTCAGATCTTAA

>Glyma. 02G240500

ATGGCACCTGTTTTGCCTCCCGGTTTCAGATTCCACCCTACAGACGAAGAACTTGTTGCTTATTACCTTAAAAGAAAGAT  
CAATGGCCGAAAGATTGAGT  
TAGAGATCATACTGAAGTTGATCTCTATAAGTGTGAACCATGGGACTTGCCAGGGAAATCATTGTTACCAGGAAAGGAT  
TTGGAGTGGTATTTCTATAG  
CCCTCGAGATAGGAAGTACCCAAATGGATCAAGAACAAACCGTGCAACCAAATCTGGATATTGGAAGGCCACGGGGAAGG  
ATAGAAAAGTAAATTCACG  
GCTCGGGCTGTGGGCATGAAGAAAACCTAGTTTACTATCGAGGAAGAGCACCCCATGGCTCTCGTACAAATTGGGTTAT  
GCATGAATACCGTCTTGATG  
AGAGAGAATGCGAAACCAATTCAGGCTTGCAAGATTGCTCTTTGCCGTGTGGTCAAGAAGACTGCAGTGATTCCCT  
CCAAAAGTTGGGGAGCATCA  
CTATGTTAATGTTCCCAATGCCAACCAAATTACAAGTGATCATTCAAGTATTGAAATATACCTGAAGGAAGGGGGC  
AAGATTTAGATAGCACAAAT  
TATTTTATGCCGGTGGATGCTTGCTCACACACAACATGGGAAACGAGACTTCTCTCACAATCAATAGTGGGATCATGAC  
AAGGGATCATGAGAAATGGT  
CACACTTCTCATCACAAGACCCTTTATTTAGTCTTCCAACCTTCTCATTTTCCAAATTTGGAGCCATAGCATACCCTCCA  
TCTAAGGTGGATATAGCACT  
AGAGTATGCAAGGATGCAGCATAGGTTTGTGTTTGCCTCCTTTGGAGGTGGATGACTTCCCTCAAGTTGGAATCTCAGAGC  
TGAAAATGACACAAGCCTCC  
GGTTCATGCAAGGAAGCAGAAGTGAACAGATATCTTGCAGGAAATTTCTTTCAGTTGCTCAAGTTTCTCAGGAATTAAT  
AAATCAATCCAACACTACTCGC  
AGGAATGGGGTGGCAATAATGATAATTATGCTCCTCGTGAAGATGATTTTACCTTCATGGTTGGCACTAATTACAATCAT  
TCAAATCATGGAATGAGCTC  
AATGAGGTATGCTGACAAAACATGGGAAGATGCAACACAAGGACAATAGAGATCGGAGATGTGGATGAAGAATTTAAGG  
CAGAGAGGATGGTGGAGAAT  
TTAAGATGGGTGGAATGTCAAGTGAAGATTTACAAAAGATGGAAGAACAAAAGATTGTCCAATAGAAGATATTTCAAG  
CTTCCAAACTAATGAGGTGC  
AAGAATCTGAGCAACATAGCAACAAGGAGCACAATGACGACTGAAATCAACGATTTCTCATTGGGCTTCATCAATGAC  
AATGATGGCCCTAACGAGAA  
CTTCATAGAAGATGGTAACATAGATGATTATTCAAGTTCTCCTAGCTTTGAGGTCGTTGAGGAAATAAAGGTCAATCATG  
GAATGTTAGTTTCGACTCAT

CAAGTAGTGGAGACATTCTTTCACCAAATAGTTCCTTCACAACTGTTCAAGTTCACCTCATCAATTCAGTGATGGCACA  
TAACAATCATTATGTAGAGA  
ATGCAGAGGCAATGCTAATGATAATGGAGAACAAAGGGTCTTCATTAAGGAATAAGGTTAAGGCCATGTGATGGGGAAG  
CTTATAAACCTTCAAAGAC  
AATTGCAAGTGAATTGTATTTCGTCTTGCACCTGTGTTGATGCATTGTGTTTATTTGAAGGAAGAAGTGAAATTTGGA  
ATGAGTCAAATAATGAGGTT  
AATTGGTTTGTGGTGTCAAAGTCATGAGAAAGAATTAAGTGCAGTCTTGAAGAAAATAGGCATTTTTCTCACCATATC  
TTTGGCTTTTTGTACCATGT  
GGGCTAGCCAGAATATGGTAGTTAACCCCTTGA

>Glyma. 04G226700

ATGGGTTCCGGTGGACTGTTATCCGTCTCGTGTGGACGATGCGGCCGTGGTGTCTCTAGATTCGCTGCCGTTAGGGTTCCG  
ATTCCGACCTACCGACGAGG  
AACTCGTCAATTACTACCTGCGACAGAAGATCAACGGTAATGGTCGCGAGGTTGGGTTATCCGAGAAATTGATGTCTGC  
AAATGGGAGCCTTGGGACAT  
GCCCCGTTTGTGGTGTACAGACTAAGGATCCGGAGTGGTCTTCTTCTGTCCACAGGACCGAAAAGTATCCAAATGGGC  
ATCGATTGAACAGAGCGACG  
AATAATGGGTATTGGAAGCGCAGGGGAAGGATCGTAAAATCAAGTCTGGGACGATTTTGATTGGAATGAAGAAGACTTT  
GGTGTCTTACTGGTTCGAG  
CACCCAAGGGGAATAGGACCAATTGGGTTATGCATGAGTATCGCCCCACTTGAAGGAGCTTGATGGTACCAATCCTGGA  
CAGAATCCATATGTCCTTTG  
TCGCTTGTTTAAGAAACATGATGAGAGCCTTGAAGTTTCACACTGTGATGAAGCAGAGCCGACTGCTTCCACTCCTGTGG  
CTGCCTATTACTCCACAGAG  
GAAATACAATCTGATCTGGCTGTTGTTGCAGGATCGCCGTCAAGTTACAGAAGATGATAAGCATCAGTCAATGATCCC  
TGCACACTCTGAGGAAGCAA  
TATCCAATGTTGTAACCCCGGTTGATCGCCGACTGATGGATATGATGCTTGTGATGCACAAAATCAAATTGAGTTACCA  
ACTGCGGAGGAGTTTCAACC  
ATTGAACTTTGATATATATTATGACCCAAGAAGCGAGCTACTGGATGGCAAATTATTCTCCCCTGTAATTGCACATATTC  
AACCAGAATTCATTATCAA  
GCAAACATCGAATCAGATGGTTCGATATGGGCTTCAATATGGTACAAATGAGACAAAATGTCAGACTTTTTGAATTCAGT  
TGTTAACTGGGATCAAGTAC  
CCTTTGAGGATCCCAATTGTCAACAGCAGAGCTACCCCTTGTTAATGTTAAGGATAACATATTAACAGCGACTTAGAT  
TCTGAACTTGCCAATATGAC  
ATGTATGCAAGCTGGTTATGCAGAGGGGGCAATTGACGGAAGGATTCCTTTGTTGATAACTTCAGAATTTGCAGCACCA  
CTGGCATCCCCGTTGACTGT  
GTTGGTGACGAGCAGAAAAGCAATGTTGGGTTATTTCAAACAATTCAGAGAGCTTTTACTGATGTTAATATGGGTCA  
AGTATAACAATGTAGTTGATG  
ATTATGAGCAACAAAGAATCTGTAGTGCAGTTGCTAGTGGCAATACTGGAATCATAAGGAGGCATCGTGAGGTACGAAAT  
GAACAGCTAAGCATAAACTC  
AACACAAGTACTGCACAGAGGAGAATTCGTTTGTCAATGGCTACACATGGCTCAAATAAGACGGTGAAAAGTGAAAGTT  
GTGCACAAGAAGAGCTTTAT  
GCAAAACCAGTCATTGCTGTGGGGAGAAAGGTTTCAGAAAATCATGCTTCTGATGAAAGTGCTACTCTTACTAATGATGG  
GAATGAACTGCAGAAGACAC  
CCGAGTCAACCGCAAAGAAAGATTTCTCAACAAGTTACAAAAGCAGGCTCCACCTTGGGGTTGAAAGACCTTTTCTTG

CTCAGAAGGGTGCCTCACAT  
TTCAAAGGCTTCTCAAATCGCACCAAGTGTCTTCTGTTTTTGTACTTTCTGCCTTTGTAATGGTCTCATTAGTGGTCT  
TTACTGACATTTGGGGATAT  
CTTAAATTTTAA

>Glyma. 06G138100

ATGGGTTCCGTGGACTGTTATCCTTCTCGTACGGACGATGCTGCCGTGGTGTCTTTGGATTGCTGCCTTTAGGGTTCCG  
ATTCCGACCCACCGACGAGG  
AACTCGTCAATTACTACCTGCGACAGAAGATCAATGGTAATGGTCGCCAGGTTTGGGTTATCCGAGAAATTGATGTCTGC  
AAATGGGAGCCTTGGGATAT  
GCCCCGTTTGTGGTGGTACAGACCAAGGATCCGGAATGGTCTTTTTCTGTCCACAGGACCGGAAGTATCCAAATGGGC  
ATCGATTGAACAGAGCGACA  
AATAATGGGTATTGGAAGGCAACGGGGAAGGATCGTAGAATCAAGTCTGGGAAGGATTTAATTGGAATGAAGAAGACTTT  
GGTGTCTTACACTGGTCTGTG  
CACCCAAAGGGAATAGGACCAATTGGGTTATGCACGAGTATCGTCCACTTTGAAGGAGCTTGATGGTACTAATCCTGGA  
CAGAATCCATATGTCTTTG  
TCGTTTGTTTAAGAAACATGATGAGAGCCTTGAAGTTTCACACTGTGATGAAGCAGAGCAGACTGCTTCCACTCCTGTGG  
CTTACTCCACAGAGGAAATA  
CAATCTGATCTGGCTGTTGTTGCAGGATCCCCCTACAAGTTACCGAAGATGATAAGCACCAGGCAATGATCCCTGCACA  
CTCTGAGGAAGCAATATCCA  
ATGTTGTAACCCCGTTGTTGCCGTAGTGACAGATATGATGCTGTGCATGCACCAAATCAAATTGTATTACCAACTGCG  
GAGGAGTTTCAACCATTGAA  
CTATTATGACCCAAGAAACGAGCTATTGGATGATAAATTATTCTCCCCTGTACTTGCACATATTCAACCAGAATTTTCATT  
ATCAAGCAAACATCGAATCA  
GATGATTGGTATGGGCTTCAATATGGTACAAATGAGACAAACATGTCAGACTTTTTGAATTCAGTTGTGAATTGGGATCA  
AGTATCCTTTGAGGATCTCA  
ATTGTCAACAGCAGAGCTACCCCTGTTTAATGTTAAGGATAGCGTATTAAGCAGCGATCTAGATTCTGAACTTGCCATT  
ATGACATGTATGCATGCTGG  
TTCTGCGGAGGGGCCAAATAACGGAAGGAAACCTTTGGTGATAACTTCAGAATTTGCGCAGCACCCTGGCATCCCTGTTG  
ACTGTGGTGGTACGAGCAA  
AAAAGCAATGTTGGGTTATTTCAAACAATTCCCAGAGAGCTTTTACTGATGTTAATATAGGCCAAGTATATAATGTAGT  
CGATGATTATGAGCAACGAG  
GAATCTACAGTGCAGTTGCTAGTGGCAATACTGGAATCATTAGGAGGCATCGTGAGGTACAAAATGAACAGCTAAGCTCA  
AATCAACCCAAGGTACTGC  
ACAGAGAAGAATTCGTTTGTCAATGGCTACACATGGCTCAAATAAGATGGTGAAGTGAAGTTGTGCACAAGAAGAGC  
TTAATTTAAAATCCGTCATT  
GCTATGGAGGAGAAAGCTTCAGAAAGCCATATTTCTGATGAAAGTTCTACTTCTACTAATGACGGGAATGAACTGCCGAA  
GACATCCAAATCATCCGGCA  
AAAGAAAGATTTCTCGACAAGCTACAAAAGCAGGCTCAACCTTGGGGTTGAAAGACTTTTTATTGCTCAGAAGGGTGCCT  
TACATTTCGAAGGCTTCCTC  
AAATCGTGCCAAGTGTCTTCTGTTTTGTAGTTTTCTGCCTTTGTAATGGTCACCTTAGTGGTCTTTACTGACATCTGGG  
GATATCTTAAATTTTAA

>Glyma. 07G047900

ATGGAGAACAACATAATTTCCATATGTGATCACATGCCTGTAGGATTCAGATTCCGTCCCACAGATGAAGAGCTTGTGAA  
CTATTACCTCAAACACAAGC  
TTCTTGCCGATGATTTCCCTGTCCACATCATCCCTGAGATCGACCTTTGCAAAGTGGAGCCTTGGGATGTACCAGAAAGA  
TCAGTGATCAAATCCGATGA  
CCCAGAATGGTTTTTCTCAGTCTGTGGATTACAAGTACTTGAAGAGTAAAAGGTTTAAACAGGACAACCAAGCGTGGCT  
ACTGGAAAACCACTGGGAAT  
GACCGGAACGTTAAGATACCGGGCACCAGCAATGTCATTGGGACTAAGAAGACCCTTGTTTTCCACGAAGGCCGTGGTCC  
CCGTGGTGTCAAGACCAACT  
GGGTTATTCATGAATACCATGCTGTTACCTCCCATGAAAGCCAGAGGGCTTTTGTTTTATGCCGCTTGATGAAGAAAGCT  
GAGAAAAAAATGAAGGGGG  
AATTGAGGCACCAACCTTTGATGAAGGGGAGCCAGTGTACACTGTTTTCTGACTATGGAAATCAGGTAGATATTATTC  
CCGGAGTAGATATGGAAGAA  
ATCTTTTCAGGCAGTGGATCGGGCCGAGAAATTCTCCCCCAGTACAACGGTCTCAAACCTGGCATTGGGCTGGAAGATTT  
TTTCGCAAACCTCTCCATTGT  
TTAATGCCACTTTGGAAGCGAAAACATCAATATGCAAACCTTCACTTGAAGTACCACGATGAAGAGTTGGTAAATTCA  
TTTTGGGTTGATGATGAAGA  
ATTTGTTATCAATGAAGAAAGAAGACTGTTTTGTCAATAGTCCACCCAACCAAGTCATTTAGAAGGTATAACAATG  
AAAGCAGTGAATAGATGCT  
GAAGTTGTCTCTAATCTGAATGAACACATTAGTGCTGATGAATACCCTGCACTGAAAATGTTTCAATCATCATATGATGT  
CCGTGGTGGCACAAGTCGTC  
TAGCTTCTAACCATAAAGCAAACAAAGAGAAAAAGGAGAGTATCATTCCAGATGATTTTTGGGCAGTGGAGACATCCTCT  
TGTGACTCAACTGCAGATGA  
ACCAATTGAAATTTCTAGTTCTCTTCCACTCCAACAAGAATGAAAAATCAGTGTCTAAGACCTGACAAGTTCATAT  
TACAAAGAACTGTTGCAGGA  
AGACCTCAAACACAAAAGAAAGTTTCAAACAATGCAGTCTCCCATGTAGAGGTTTCGGAAGGAATTGCTCACTGTGAAATC  
AGAAAAAGATCAGAAAAATG  
CTAAAACGCTAGTTAAGAGGGAACCTCAAAAACAAAAGCCAACAATCCTCTGATGTCAACAACAATGGTTCTTTCTTT  
TACATGGAGACGGCTTCAAA  
CCGAAGCCTATTTCCACGTTCCGGTGTATCTTGTCAATGTTGTCATAGGGATTTTGTGTTAATAGTTATTAGTTGGGATG  
TATTATCATGTTAG

>Glyma. 10G197600

ATGGCACGCATGGGTCCAGGGTTCCGATTCCACCCACCGACGAAGAGCTGGTGGTGTCTACCTCAAGCGCAAGATGAC  
TGGAACCTCTCCCGCTACG  
ACCACATCGCCGTCGTTGACGTCTACAAGCTCGAGCCCTGGGACCTTCCCTCTCTGTGCAAGCTGAAGACGAAGGACTTG  
GAGTGGTACTTCTCAGCGC  
GCTGGATCGCAAGTACGAAAACGGCTACAGGACCAACCGCGCCACCGAGAGGGGCTACTGGAATCAAACCGGGATCGAGC  
ATTTTGTGCATGCAGATTTA  
TTTATGATTTGTCATCATTATGAGATATGTAGTCTGGCACTGGAACCTGATTGGAGTGGTATAATTGACAGTGATAC  
TTTGCCATCATTGAACTTC  
ATTACGGGGAGTGTAGTAGCCATGCTGAGTATTCCAAAGTATTATCAAGGATCAGGAGCCATTGGCAGACACTTTTGAA  
ATTTCTTGTCTGAAAATGT  
CTGGCCTCTTGATATGACTGGGCAACATGGCGTGGGTACAAATTCAGGGGAAGATGGAGACAGTGGTGGAGCTGAGCAATA  
TTGGCAATTTTGATCTTTCA

TCGAATAATATGAATCTGGATCTTTACTGGGATGCCAACGAGAATCTTCCGATGGATGATGATGGATTTTGAATACAA  
TGATATTGCAATTGGAATG  
GGGATAATCCTACCGAGGCTGATCTTTCTGCAAATGCCATGCTAGATGAGTATGCTGCACTCGCTGATGATGATATTAC  
AAGTATATATCTTTTGATTC  
TCCTCAGATTCAGAGAGTGAAAACCTTATTCCCAACCAAGGATCACCTTTCACCCAGCAGAATGTGGAGGGAGAAACCG  
CTGATAGAGCTGTGGTTAGT  
AATGAGGGTCTTCAGTGCAGAATACACAGGAGGCAATGCTTGGCATCAGTACAAATCCACTTGTTAAGCAGGCATATGG  
ATGGTTAGCCAGCATACTG  
CTGCGCCTGCACATGCTATGGAGTTTCTGCTAAGGAGATTGCTCTTGGACTTCATCCTGTGGCTCAATCTTCCCATCCA  
GCTCATATAACTACTACAGG  
TATGATCAGCATAACAGACATTACTTTTAGAGACAATGCAATGGATTGGACTATGGGCAAAAATGGAGGGTTTAGCACTG  
TCATATCCACTGGGTTTTCG  
CAATCCGATGTTAATTCGGCTGCTTTGATGCCTGTTTCTGGCAAGACTGCATTTGTGCTGTCACATGGCTGGATTTTCTT  
GACTGGTTTCTCAGTTCTTA  
TTCTTTCACTGAGTTGCAAGATCGGAAGCATCATTGCCTACAGATAG  
>Glyma. 10G219600  
ATGGGTGAGGCTTCAGGAGCTGTTTCTGCTGATTGTTTCAGCCAGATGATGTCGTCGATGCCGGGTTTTCGCTTCCATCC  
CACGGATGAGGAGTTGGTGA  
TGACTATCTGAAGCGGAAGATTTGTGGGAAGAGGCTGAAGCTCGACGTGATTCGTGAAACCGATGTGTATAAGTGGGAT  
CCTGAGGATTTGCCTGGGCA  
ATCTATATTGAAAACCTGGAGATAGGCAATGGTTCTTTTTCTGTCCAGAGATAGGAAGTATCCTAATGGTGAAGGTCTA  
ACCGAGCAACCAGACGTGGG  
TATTGAAAAGCAACGGGAAAAGGATCGTAACTGATATGCAATTCTAGGTCAGTTGGAGTGAAAAAGACCCTGGTTTTCTA  
TGCTGGCAGAGCTCCTAGTG  
GTGAGCGGACTGATTGGGTTATGCATGAATATACCTTGGATGAAGAGGAGCTTAAGAGATGCCTGGGTGTTAAGGACTAT  
TATGCACTTTACAAGGTTTA  
CAAGAAAAGTGGACCTGGTCCAAAAAATGGTGAACAGTATGGCGCACCATTTAATGAAGAACAGTGGGCAGATGATGACA  
TAGTAGATTTTAATATCAAC  
TCAGCTGATCAGGAGGCTCCAAATGATGTTGATAATGGTAATGTACTGCAGCCTTTGCTTGATGATGAAATCGACAACAT  
CATTAGGGGAATTTGGATG  
ATGAGCTTGTCTTGATCAGCAGCATGTGAATGGTTATCCTGACTTTCCTCAGGTTGTTAGTGAAGAAACACAAAGTACT  
GTTGTGGATCAGTTCTCTGA  
GGCTGTGATGTTCCCTGAGCCAGTCAGAATCACACAGCCTAGCAACCAATTTTTTGGATGCACAGCCTAGCTTTGACTTCA  
ATCAGCCAGTTACTTCTCAT  
TTGCATGTTTCTGAAGCATCTGAGGTCACCTCTGCTTCCAGCATTAAAGCAAAGGAGCTTGATTTTAATGAGGATGGCTT  
CTTGAAAATTAATGATCTCA  
TTGATACTGAACCTATATTGGCAAATATGGAAAATCCTGTGGAGTACCAGCAGTTTGAAGATGGGTTAAGTGAAGTACTGAT  
CTGTTCCAAGATGCACAGAT  
GTTTCTTCGTGACCTGGGGCCAATTATTCACGAAACAGATTCACATGCATATACAAATGCATTTGTGACAGCAATATTG  
AAAGTCAAAGTTACCAGTTG  
CTGCCAAATCCAGAGGATGCCAATCAAACCTGTCGGTGAATTTCTGGATGCACGGTGAAAGAAACACCCCAAGTGCATCAGA  
AGGCTTTGTTGATTCTTTCT  
CGCTATCATCCCAGGTGTTGTATATGAATCTGTTGGCTTTCCTACGGAAGGCAATAACAATCAAAGTAGCACTGTGGAA  
GATGTTGCTACAAGTAGCTT

CTCCTCTGCTCTCTGGGCCTTTGTTGAGTCAATACCTACAACCTCCTGCATCAGCTGCTGAAAGTGCTTTGGTGAACCGAG  
CATTGAATCGAATGTCTAGC  
TTCAGCAGGTTGAAGATCAAGCACACAAAACATTGCTGCAGCAGGTAAGACACTGCAACTATGAAGAGAGCAGGCAGAAA  
GGGACTTCCATTCTTTTCT  
TCCCTATTATTATTGCTTTATGTGCTTTTGTGGGTTTTTGTGGAACTTAAGACTATTGGGGAGATGTGTCTCTCCT  
TGA

>Glyma. 11G212400

ATGAATATGGCTCCTGTTTCATTGCCTCCTGGGTTAGGTTCCACCCACAGACGAAGAACTCGTTTCTTATTACCTGAA  
AAGAAAGATAAACGGTCGTA  
AGATTGAGTTAGAGATCATCCCTGAAGTTGATCTTTATAAGTGTGAACCATGGGACTTGCCAGGGAAGTCATTGTTACCG  
GGGAAAGATTTGGAGTGGTA  
TTTCTTCAGCCCTAGAGATAGGAAGTACCCTAATGGATCAAGGACCAATCGTGCAACAAAATCTGGGTATTGGAAGGCCA  
CAGGGAAGGACCGTAAGGTG  
AATTCTCAGAGCCGTGCAATAGGGATGAAGAAAACCCTAGTTACTATAGAGGTAGGGACCACATGGTTGTCGCACCGG  
TTGGGTTATGCATGAGTACC  
GTCTTGATGAGACTCAGTGCGAACTAATTCAGGCTGCAGGATGCATATGTCTTTGCCGTGTGTTCAAGAAGACTGCA  
GTGATTCACCCAAAAGTTGG  
AGATCAGCACTATGTTAATGTTCTTAGCCATGCAAATCAGATGACAAGTGATCAATCATCAAGCATTGACATTGAGCTAT  
ACTCAGAAGGAAGAGGAGAA  
GTTTTAGAGAGCTCAAATATTTGATGCCGTGGGATACATGCCCATCCCCAACATAAATATTGGGTCTTCTCTCAATAT  
CAATATCAATGGTGGGACGA  
AAAGGGATAATAATAATAATAATATTGGGACATGGTCACACTTCTTATCATCAGAAGACTTACTCAATCTTCCAACATCT  
ACTTCTTCATTTCCAATTA  
TGGATCTATGAGTTACCCTCCATCAAAGGTGGATATAGCACTAGAGTGTGCAAGGATGCAGCATAGGTTTACCATGCCTC  
CTTTGGAGGTGCAGCAGGAC  
TTCCCTCAAGTTGGCATTTCGAGCTGAAGATGGCACAAGCCTCGGCTTCCAATATGTGCCGAGGAAGCAGAAATAATGA  
AACAGATATCTTGAGGAAA  
TTCTTTTCAAGTTGCTCATGCTTCCAGGAATTAATAAATCAATCCAACACTCATCATCACAGGCATTTGGTGCCAATGAA  
AACAACTACGCTCCTCCTCA  
TGAAAGTGATTTCACTTTTATGTTGGCACCATTACAATCATGTGAATGATATGAACCCATGGGATTTGTTGACAATA  
TAGCATGGGAAGACCCTAAC  
GCAAGATCAATAGAGATCGGGGATCTTGATGATGGATTCAAGACAGAGAGGATGGTAGAGAATTTAAGATGGGTTGGAAT  
GTCCAGCAAAAATATGAAAA  
AGGGCTTTATGGAAGAGCAAAAGATTGTGCCAATTGAGCATATCTCAAACCTCCAAGCTAACAGGGAAGAAAATGAGGTG  
CAAGTAGTATCTGAGCAGCA  
CAATAGCAACAAAGAACTCAATGATACTGACATTGATGATTTCTCAATGGGATTCATCAATACTGACGACCCCAATGAGA  
ACTTCATAGATGAGGGTAAC  
ATTGACTATTCAAATTCTACAAACTTTGAGGTTGTTGAGGAAACAAAAGTCAGTCATGGAATGTTTGTCTCCACTCGCCA  
AGTAGCTGATACATTCTTC  
ATCAAATAGCTCCTTCACAAAACCGTCAAAGTTCAAATCCAGTACTGGCTGAAAATCAATCTATAGAGAATGCAGTA  
GTAATGGTTAACCAAGGGCA  
CTCTTTCTTTAGAAAAGTTTAGGGCTTATGTGATGGGGAAGCTGATCAAGCCATCAAACACAATAGCAAGTGCCCTTGTAT  
TCATCTTTGCACTTTTGTG

GTGCATTGTGTTTGTGTTGAAGGAGCAAGTAGGTGAAGATTTGAAACCAGACCCCAAATGCTTTGATGGTGCTAACACCAT  
GAAGAAAATGAGACAATTAC  
CAGCTGAGAATAATATCATATGGAATGAACAAGAAAATTTTTGGTCTGTTGGTATTAATGTGGGAAAGGATTTGGTGTG  
GTCTTGAAGAAGATAGGCAT  
TTCTCACCATATCATAG

>Glyma. 12G186900

ATGGAAGGGGTTTCGAGGGAGGCTCAGATGTCGATTGCTGCTTCTCCATGTTTCTGGATTTCAGATTCTGCCCCACTGA  
TGAGGAGTTGATTTCTTATT  
ACCTTAGGAAGAAGATGGATGGCCATCAAGAGAGTGTCAAGTCATTTCTGAGGTTGAACTTTGTAAATACGAGCCTTG  
GATTTACCAGCCAAATCATT  
CATTCAATCAGATAACGAATGGTTCTTCTTCTCTCCCCGAGGAAGAAAGTACCCAAAAGGTTACAAAAGTAAAAGAGCAA  
CTGAATGTGGATATTGGAAG  
GCAACTGGCAAAGAGCGTAATGTAAAGTCAGGTTCTAACGTTATAGGAACGAAGCGGACTTTGGTGTCCACTTAGGGCG  
TGCACCTAAAGGGGAGAGGA  
CCGAATGGATTATGCATGAGTACTGCATCAATGAAAAGTCTCAGGATTCTTTGGTCATTTGTCGCCTCAAGAAGAACACA  
GAGTTCCGTTTGGGCGATTCT  
TTCGAATAGAGCTTCATCAAGTCAAAGGCACCCCGTAGGATGTAGCTCCAAGAGGGACAGTTGCAGTTATGGTTCTCCTT  
CAATGGAGCAAATTGATTCT  
GTGTCCGAACCGAATCAGAGACCGTTAGTGAAGCTACTTTGGCAGTGTCTTCAGGCCAACCAAAGGAGAGATATGAAGA  
GGATTGTTATGCTGAGATAC  
TAAAGGATGATATCATTAAATTAGATGAATCATCAATCTCGGTAGAGGGTCACACAAGACCACAGGATCCTATACAGATG  
CATCCTTACCACAAGGCAC  
ATCACAACGGAGAATAAGATTAAGGGTTGGGAATCAAAGCATTCTCCTGCAGTAGTTCGTTTCCCTTGACAATGCACT  
CGTCAAAGAGTACCTTCTTC  
GCCAGAATAACCATTAGTTTGGTGGTATTTCCCTTCTTTGTCTTCACTTTGACAGTTCTATATTTTTTGTCTTTAGTGGG  
TGAAACAAACAAAAGTTG  
AAAGAGAGAGAAAACATCGAGCTGCAGTCTGTTCTAGGGTTACACTTGTTTCCATTGCTGGTAAAGAATCTCCAATCTTC  
CAACTGCGTCACTCGCTT  
TGTTCCAATTCAGTCCACAATTTACTTTTTCCACTTTCCCTAACCTCCCACTCGGAACTCGTCTGTTACCTATCGATAA  
TGAATTTGGGGTTACCTCGC  
TCACATCCATCGTTTCAGTGAAGCAGCAGCTTGTGGCCGATGTTGACTCTAACCCAGCGTGTGCAGAAGCAGCATCA  
GATTTCCAAGGCTGGAGAAA  
CCGTTAAGGAGAAGATTATTTTAGTGCAAGAGAAGAATATTCGAAGACTGAATGAGCTAGTTCGGCATCTCCAGGAGCAA  
CTGCAGCAGTGTAGAGGACG  
CAATGGAATAAATGGCACTGTAAGCCCTCTAGCTGAGCGGATTCTTGAGCTTGAGCGACAGCAAATTTAGAGGATT  
AA

>Glyma. 13G314600

ATGATGGAAGGGGTTTCGAGGGAGGCTCAGATGTCGATTGCTGCTTCGTCATGTTTCTGGATTTCAGATTCTGCCCTAC  
CGATGAGGAGTTGATTTCTT  
ATTACCTGAGGAAGAAGTTGGAGGGTCATGAGGAGAGTGTCAAGTCATTTCTGAGGTTGAGCTTTGTAAATACGAGCCT  
TGGGATTTACCAGCCAAATC  
ATCATTCACTCAGACAACGAATGGTTCTTCTTCTCTCCCCGGAAGAAAGTACCCAAATGGTTACAAAAGTAAAAGAG

CAACTGAATGTGGATACTGG  
AAGGCAACTGGCAAAGAGCGAAATGTAAAGTCAGGTTCCAACATTATAGGAACGAAGCGGACTTTGGTGTCCACTTAGG  
GCGTGCACCTAAAGGGGAAA  
GGACTGAATGGATTATGCACGAGTACTGCATTAATGACAAATCTCAGGAATCTTTGGTCATTTGTCGCCTCAAGAGGAAC  
ACAGAGTCCGTTTGAGCGA  
TGCTTCGAATAGAGCTTCATCAAGTCAAAGGCATCCGGTGAATTCACATGAAAGTGGTTGTGCTATCTCAGGAGGTGGTA  
TTGATCAAAGGGATGCTTGT  
GAGCAAGACAAAGAGGTTGGATGTAGCTCCAAGAGGGACAGTAGCAGTTATGGTTCTCCTTCAATGGAGCAAATTGATTC  
TGTGTCCGAATCGAATCAGC  
GACCAGTTAACGAAGCTACTTTCACTGAATCTTCAGGTCAACCAAAGGAGGGGTATGAAGAGGATTGTTATGCAGAGATA  
CTAAAGGATGATATCATCAA  
ATTAGATGAATCATCAGTCTTGGTAGAGAGTCACACAAGACCACAGGATCCTACACAGATGCAACCTGCACCACAAGGCA  
CAGCACAACGGAGAATAAGA  
TTAAGGGTTGGGAATTCAAAGCATTCTCGTGCAGTAGTTTCGTTTCCCAAGCACAATGCACTCATCAAAGAATACCTTCTT  
TGCCAGAACAACCAACAGTT  
TGGTGGTATTAGCTTTCTTCGTTTTCACTTTGATGGTTCTATATTTTTTGTCTTAGTGAGAGGACAAAAACAAGACAAG  
TATTGTGGGGAATTTTCGGG  
TGTAATCATGATTAG

>Glyma. 14G189300

ATGGGTGCTGTGTGGAGTGCTACCCGCCCTCGCACGGCGGTGCTGTCCCTCAACACGCTGCCGTTAGGGTTCCGTTT  
CCGTCACCGATGAGGAGC  
TTATTGACTACTACCTGCGCTCGAAGATCAACGGAAATAGTGACGATGTTGGGTTATTCGTGAGATTGATGTCTGCAAA  
TGGGAGCCTTGGGACTTGCC  
TGATTTGTCAGTGGTACGGAACAAGGATCCAGAGTGGTTCTTCTGTCCGCAGGACCGGAAGTATCCAAACGGGCACA  
GGTTGAACCGAGCTACGAAT  
CATGGCTATTGGAAGCGCAGCGGAAGGATCGAAAGATTAAGTCTGGCTCCACCTTGATTGGAATGAAGAAGACTCTTGT  
TTTCTATAACCGGTCGTGCTC  
CCAAGGGGAAGAGGACCAATTGGGTTATGCATGAGTACAGGCCTACCTTGAAGGAGCTTGAAGGAACCAATCCTGGACAG  
AATCCATATGCCTTTGTGC  
ATTATTTAAGAAACAAGATGAGAGTCTTGAAGCTTCAAACGGTGATGATGTGGAGCGGACTGCTTCAACTCCTACA  
CTGCTTCAACTCCTACA  
CCAATTACTGTCCCGACGAA  
ATACAATCTGATTAGCTCTGGTTCCAGCATCTTCTCACAGGTTACTGAAGATGATAAGCCTCTACCAGTTATTTCCGA  
GAACTCCGAGGAAGCAATAT  
CCAACATTATAACCCCTGGTGATATTCATAGTGACGAATGTGATGCTCCTGATGCACAATATCAAATTGTTGAACCGATT  
GCAGAGGAGGATCAGCTGTT  
GAGCGTGGACATATTTTATGACCCAACAAATCAGCAATTAGACGACAAATGTTCTCCCCTGTCCATGCACATTTCCAG  
CAGATTTTTTATFATCAAGCT  
AACAAATCAATCAGAACTCAGTATGGTACAAGTGAAGTATTTTCAAGATTTTTTACTCTGTTGTTAATTGGGATTCATT  
CTCTTATGCTACCAGCAGTC  
TAGATCTGGGCTCATCTCCTTAATCCTAAGGACAATGGATCAGGCAGTACTCAGATGTGGAAATGGCCAATATGCTG  
CATCTGCAAGCATTACATGA  
TTATCCTAAGGAGGAGTTGAGGAGAAGTTCAATGTAGGATTATTTCAAGAAATCCCAGATGGCTTTCTCAAATGATG  
GTCTTATGGGCAAGTGCAC



AATGTGGCCAACTATTGTGAGCAACCAAGAACTTTGATGCATTTGTTAATGGTGATACTGGAATCAGAATAAGGACTCG  
TCATGGAAGAAATGAACAGC  
CAAAATGAACATGATGATACAATCACAAGGTATTGCACCAAGGAGAATACGATTGGGAGTTGTTAGGCGTCCGCTTGGT  
TCTCAGGAGACAGCAAAAAGA  
TGGGAGTTGTGCTTGTGCCCCAGAAGACCATAACTCAAAAACCATCATTAGTGCGGAGAAGAAAGCTTCAGAAAACCATG  
CTGCTGATGAGAGTTCCACT  
GTTTCTGATGAGAGTTCCACTGTTACTGATGATTCTGATGAACCAGAGGAGGCATCTCCCAAGTCAACTGACCCGAGAAA  
GATAAGTCAGCAACATGTTG  
CAACTGCAGAAATCCATCTCGGGGTCGAAAAGACCTTCTAGTGAGCAGAAGGGGCTGTACACCTCAAAGGTTTCTCTAAT  
TGCGCCATGTGGTCTTATGT  
TCTTGCAGTTTCTGCAACTGTATTGGTCTCAGCAATACTCCTTGTTAATATATGGGCATATGTCAGATCTTAA

>Glyma. 14G210000

ATGGCACCTGTTTTGCCTCCCGTTTCAGATTCCACCCTACAGACGAAGAACTTGTGCTTACTACCTTAAAAGAAAGAT  
TAATGGACGAAAAGATTGAGT  
TGGAGATCATACTGAAGTTGATCTCTATAAGTGTGAACCGTGGGACTTGCCAGGAAATCATTGTTGCCGGGAAAGGAT  
TTGGAGTGGTATTTCTTTAG  
CCCTCGAGACAGGAAGTACCCAAATGGATCAAGAACAAACCGTGCAACTAAATCTGGATACTGGAAGGCCACAGGGAAGG  
ATAGAAAAGTAAATTTCCAG  
GCTCGAGCTGTAGGTATGAAGAAAACCTAGTTTATTATCGAGGAAGAGCACCCCATGGCTCTCGTACAAATTGGGTAT  
GCATGAATATCGTCTTGATG  
AGAGAGAATGCGAAACCAATTCAGGCTTGCAGGATGCATATGCTCTTTGCCGTGTGGTCAAGAAGACTGCAGTGATTCTCT  
CCAAAAGTTGGGGGGCACTA  
TGTTAATGTTCCCAATGCGAACAAGATTACAAGCGATCAATCATCAAGCATTGAACTATACTCTGAAGGAAGGCACGAAG  
ATTTAGATAGCTCAAATAT  
TTGATGTCCATGGATATTTGCTCACCTGCAACATGGGAAATGATCAGACTTCTCTACAATCAATAGTGGGATGACAAG  
GGATCTTGAGAAATGGTCAC  
ACTTCTCATACAAGACCCATTATTTAGTCTTCCAACTTCTTCATCATTTTCCAATTTTGGAGCCATAGCGTACCCTCCA  
TCCAAGGTGGATATAGCACT  
AGAGTGTGCAAGGATGCAGCATAGGTTTGTATGCCTCCTTTGGAGGTGGATGACTTCCCTCAAGTTGGAGTCTCAGAGC  
TGAAAATGGCACAAGCCTCC  
GGTTCATGCAAGGAAGCTGCAGAAGTAAACAGATATCTTGCAGGAAATCTTTCAGTTGCTCAAGTTTCTCAGGAATT  
AATAAACCAATCTAGCTACT  
CACAAGATTGGGGTGGCAATGATAATTATGCTCCTCGTGAAGATGATTTTACCTTCATGGTTGGCACTAATTACAATCAT  
TCAAATGAAATGAGCTCAAT  
GAGATATGTTGACAAGACATGGGAAGATGCAATAAACACAAGGACAATAGAGATCGGAGATGTGGATGAAGAATTTAAGG  
AAGAGAGGATGGTAGAGAAT  
TTAAGATGGGTTGGAATGTCAAGTGAAGATTTAGAAAAGATGCAAGAACAAAAGATAGTCCCAATAGAGGATATTTCAAG  
CTTCCAAACAAACAGGGAAG  
AAAATGAGGTGCAAGAATCTGAGCAACAAAACAAGGAACACAATGACACTGAAATCAACGATTTCTCATTGGGCTTC  
ATCAATGACGATGACCCTAA  
CAAGAACTTCATAGAAGATGGTAACATGGACGATTATTCAAGTCTCCTAGCTTTGAGGTCGTTGAGGAAATAAAGGTCA  
ATCATGGAATGCTTGTTCG  
ACTCGTCAAGTAGTGGAGACATTCTTCCACAAATAGTTTCTTCAAACTGTTCAAGTTCACCTCATCAATTCAGTGAT

GGCACACAATCATTATGTGG  
AGAATGCAGAGGCAATGCTAATGATAATGGAGAACCAAGGGTCTTTATTAAGGAATAAGGTTAAGGCCTATGTGATGGGG  
AAGCTTATAAAGCCTTCCAA  
GACAATAGCAAGTGAATGTATTTCATCTTTGCATTGTGTTGATGCATTGTGTTTATTTGAAGGAAGAAGTGAAATTT  
GGAATGAGTCAAATAATGAG  
GTTTGGTTTGTGGTGTCAAAAGTCATGATGAGAAAGGACTGAGTGCATCTTGAAGAAAATAGGCATTTTCTCACCAT  
ATCTTTGGCTCTTTGTACCA  
TGTGGGCTAACCCAGAAATATGATAGTTAACCCCTGA

>Glyma. 16G016400

ATGGAGAACATAATTTCCATATGTGATCACATGCCTGTAGGATTCAGATTCCGTCACAGATGAAGAGCTTGTGCGACTA  
TTACCTCAAACACAAGCTTC  
TGGCTGATGATTTCCCTGTCCACATCATCCCTGAAATCGACCTTTGCAAGGTGGAACCTTGGGACGTACCAGGAAGATCA  
GTGATCAAATCCGATGACCC  
AGAATGGTTTTTCTTCAGTCCTGTGGATTACAAGTACTTGAAGAGTAAAAGGTTAACAGGACAACCAAGCGTGGCTTCT  
GGAAAGCCACTGGGAATGAC  
CGAAAATAAGGATACCGGGCACCAGCAATGTCATTGGGACTAAGAAGACTCTGTTTTCCACCAAGGCCGTGTTCCCG  
TGGTGCCAAGACCAACTGGG  
TTATTCATGAATACCATGCTGTACCTCCCATGAAAGCCAGAGGGCTTTTGTGTTGTGCCGCTTGATGAAGAAAGCTGAG  
AAAAAAATGAAGGGGAAT  
TGAGGCACCGTCTTTTGTGAAGGGGAGCCAGTATACACATGGTTTCTGACTATGAAATCCGGCAAGAGCAGAAGGCA  
TTGCATCTGTAGATATTATT  
CCTGGAGTAGATATGGATGAAATCTTTCGGGCAGTGGATCAAGCTGAGAAATCTCCCCCAGTACAACAGTCTCCAAC  
TGGCATTGGGCTGGAAGATT  
TTTTCCAAACTCTCCATTGTTCAATGCCGTTTTGGAAGTGAAAACATCAATATGCAAACCTCACTGAAGTTACGGAT  
GACGAAGATGAGTTCATACC  
CTAG

>Glyma. 18G043900

ATGAATATGGCTCCTGTTTCATTGCCTCCTGGGTTTAGGTTCCACCCACCGACGAGGAACTCGTTTCTTATTACCTCAA  
AAGAAAGATAAATGGTCGTA  
AGATTGAGTTAGAGATCATCCATGAAGTTGATCTTTATAAGTGTGAACCATGGGACTTGCCAGGGAAGTCATTGTTACCG  
GGTAAAGATTTGGAGTGTA  
TTTCTTCAGCCCTAGAGATAGGAAGTACCCAAATGGATCAAGGACCAATCGTGCAACCAAATCTGGGTATTGGAAGGCCA  
CAGGGAAGGACCGTAAGGTG  
AACTCTGAGAGCCGTGCAATAGGGATGAAGAAAACCCTAGTTTACTATAGAGGTAGGGCACCACATGGATGTCGCACAGG  
TTGGGTTATGCATGAGTATC  
GTCTTGATGAGACTCAGTGCGAAACTAATTCAGGCTTGCAAGATGCATATGCTCTTTGCCGTGTGTGCAAGAAGACTGCA  
GTGATTCCCCAAAGGTTGG  
AGATCAGCACTATGTTAATGTTCTAGCCATGTAATCAGATTACAAGTATCAATCATCAAGCATTGACATTGAGATAT  
ACTCAGAAGGAAGAGGTGAA  
GTTTTAGAGAGCTCAAATATTTGATGCCGTGGGATACATGCCATCCCCAAACATAAATATTGGGTCTGCTCTCAATAT  
CAATATCAATGGTGGGACAA  
GGGATAATAACATTGGGACATGGTCACACTTCTTAGCAGAAGACTTACCCAATCTTCCAACATCTGCTTCTCATTCCC

AATTATGGATCTATGAGTTA  
CCCTCCATCAAAGGTGGATATAGCACTAGAGTGTGCAAGGATGCAACATAGGTTTACCATGCCTCCTTTGGAGGTGCAGG  
ACTTCCCTCAAGTTGGCATT  
TCCGAGCTGAAGATGGCACAAGCCTCGGGTTCCAATATGTGTGGAGGAAGCAGAAATAATGAAACAGATATCTTGCAGGA  
AATTCTTTCAGTTGCTCATG  
CTTCCCATGAGTTAATAAATCAGTCCAATACTCATCACATTCACAGGCATTGGGTGCCAATGAAAATAACTATGCTGCA  
CCTCATGAAAGTGATTTTAC  
TTTTATGGTTGGCAACAATTACAATCGTGTGAATGATATGAACACCATGGGATTTGTTGACAAAGCATGGGAAGACCCTA  
ACGCAAGATCAATAGAGATC  
GGGGATCTTGATGATGGATTCAAGACAGAGAGGATGGTGGAGAACTTAAGATGGGTTGGAATGTCCAGCAAAAATATGGA  
AAAGGGCTTTATGGAGGAGC  
AAAAGATTGTGCCGATTGAGCATATCTCAAACCTCCAAACTAACAGGGAAGAAAACGAGGTGCAAGTAGGATCTCAGCAA  
CACAATAACAACAAAGAACT  
CAATGACACTGACATTGACGATTTCTCAATGGGGTTCATCAATGGTGACACCACAATGAGAACTTCATAGATGAGGGTA  
ACATTAATTATTCAAATTCT  
ACAAACTTTGAGGTTGTTGAGGAAACAAAAGTCAGTCATGGAATGTTTGTCTCCACTCGCCAAGTAGCTGACACATTCTT  
TCATCAAATAGCTCCTTCAC  
AAACCGTAAAAGTTCAACTCAATCCATTAATGGCTGAAGATCAATCTATAGAGAATGCAGTAATGGTTAACCAAGGGCCC  
CCTTTCTTTAGAAAAGTTCAA  
GGCCTATGTGATGGGGAAGCTGACAAAGTCATCAAACACAATAGCAAGTGCCCTTGTGTTCTCTTTGCACTTTTGTGTA  
TGCATTGTGTGTTTTTGAAG  
GAACAAGTGAAGATTGAAATCGGACCCCAAATGCTTTGATGGTGCTAACTCCATGAAGAAAATTATGAGACAACCAGC  
TGAGAACATCATATGGAATG  
AACAAGAAAATTTTTGGTCTGTTGGTATTAATGCGGGAAAGGATTTAGTGTGGTCTTGAAGAAGATAGGCATTTTCCTC  
ACCATATCATTGGCTCTTTG  
TACCATGTGGGCTAACCATGTTATAGTTGACTCTTAG

>Glyma. 20G172100

ATGGGTGAGGCTTCGGGAGCTGGTTCCGCTGATTGTTTCAGCCAGATGATGTCGTCGATGCCGGGTTTTCGCTTCCATCC  
CACGGATGAGGAGTTGGTGA  
TGTAATCTGAAGCGGAAGATTTGTGGGAAGAGGCTGAAGCTCGACGTGATTCATGAAACCGATGTGTATAAGTGGGAT  
CCCGAGGATTTGCCTGGGCA  
ATCTATATTGAAAACGGGAGATAGGCAATGGTTCTTTTTCTGTACAGAGATAGGAAATATCCTAATGGTGAAGGTCTA  
ACCGAGCAACCAGACGTGGG  
TATTGAAAAGCAACAGGAAAGGATCGTAACGTGATATGCAATTCTAGGTCAGTTGGAGTAAAAAGACCCTGGTTTTCTA  
CGCAGGCAGAGCTCCTAGTG  
GTGAGCGGACTGATTGGGTTATGCATGAATACACCTTGATGAAGAGGAGCTTAAGAGATGCCAGGGTGTAAAGACTAT  
TATGCACTTTACAAGGTTTA  
CAAGAAAAGTGGACCTGGTCCTAAAAATGGTGAACAGTATGGTGCACCATTTAATGAAGAAGAGTGGGCAGATGATGACA  
TAGTAGATTTTAATATTAAC  
TCAGCTGATCAGGAGCTCCAAATGATGTTGCTGATAATGTTAATGTACCACTGCCTTTTCTTGATGATGAAATCAATAA  
CATCATTAGGGAAATTTTGG  
ATGATGAGCTTGCTTAGATCAGCAGCATGTGAATGGCTATCCTGACTTTCCTCAGGTTGTTAGTGAAGAAAACAAAAGT  
ACTGTTGTGGATCAGTTCTC

TGAGGATGTGATGCTCCCTGAACCAGTCAGAATCTCACATCCTAGCTGCCAATTTTTTGGATGCACAGCCTAGCTTTGACT  
TCAATCGGCCAGTTACTTCT  
CATCTGCATGTTTCTGAAACATCTGAGGTCACCTTCTGCTTCCAACATTAACAAAGGAGCTTGACTTTAATGAGGATGG  
CTTCTTGAAAATTAATGATC  
TCATTGATACTGAACCTACATTGTCAAATGTTGAAAATTCTGTGGAGTACCAGCATTGGAAGATGGGTTAAGTGAACCT  
GATTTGTTCCAAGATGCACA  
GATGTTTCTCGTGACTTGGGGCCAATTATTCATGAAACAGATTACATGCATATACAAATGCCCTTGTGAGCAGCAATA  
TTGAATGTCAAAGTTACCAA  
TTGCTGCCAAATCCAGAGGATGCCAATCAAACCTGTTGGTGAATTCTGGATGCATGGTAAAAGTAATCAGCTATCATCCCC  
AGGTGTTGTATATGAATCTG  
TTGGCTTTCCTACGGAAGGCAATAACAATCAAAGTAGCACTGTGGAAGATGTTGCTACAAGTAGCTTGCCTCTGCTCTC  
TGGGCCTTTGTTGAGTCAAT  
ACCTACTACTCCTGCATCAGCTGCTGAAAGTGCATTGGTGAACCGAGCTTTGAATCGAATGTCTAGCTTCAGCAGGTTGA  
AGATCAAGCACACCAACATT  
GCTGCATCAGGTAAAGACTGGAACATGAAGAGAGCTGGCAGAAAGGACTTCCATTCTTTCTTCTATTCTTAT  
TGCTTTATGTGCTTTTTGTT  
GGGTTTTGTTGAAAACCTAAGACTAGTAGGTAGAAGTATTTCTCCTTGA  
>Glyma. 20G192300  
ATGGCACGGATGGGCCAGGGTTCCGATTCCACCCACCGACGAAGAGCTGGTGGTGTCTACCTGAAGCGCAAGATGAC  
CGGAAACCTCTCCCGCTACG  
ACCACATCGCCGTTGTCGACGTCTACAAGCTCGAGCCCTGGGACCTTCCCCCTCTGTGCAAGCTGAAGACGAAGGACTTG  
GAATGGTACTTCTTCAGCGC  
GCTGGACCGCAAGTACGGAACGGGTGAGGACGAACCGGCCACCGATAGGGGCTACTGGAAGACCACCGAAAAGACC  
GCCCCGTACCCACGGCGAC  
CGCACCGTCGGAATGAAGAAGACGCTCGTTTACCACAGCGCCGGGCCCCACACGGGCGCCGACCAATTGGGTCATGCA  
CGAGTACAAGATGCTCGACG  
AGGAATTGGCACGTGCCGACAGTCCGGATGTGTTGTGGTGTGTAGGATTTTCGAGAAGAGTGGTCTGGGCCGAAG  
AATGGGGCAAAATATGGTGC  
TCCCTTAGATGAGAAGGAGTGGGATGTTGAGGATGAGCAGGAGGAGGAGGAGGAGAATGAGCAGAAGGACGTGGCTC  
CCTGCTGGTTCCTCATAAC  
GCGGTGGCTCCTCCTCCCTTGTGCGTAGTTGCTGATAATGCGGAGGCTCATCCTCCTTTGACGGCAACTGTTGATAA  
TAAATATATGGTGGCTCCTC  
CTCCTCCTTTGAGGCTAATTTTGGATGATGAGGTTTTCAATGCTGGGCCTATGTTGAAACCAACGACCTTGACATGGAG  
CTTAATTGGAATGATATAAT  
TGGGAGTGATACTTTTCCATCACTGAACTTTTCATCATGGGAGTGTAGTAGCCATGCTGAGTATTCCAAAGTATTCATCA  
AGGATCAGGAGCCATCAGCA  
GGCACTTTTGGAAATTTCTCGGCCTGAAAATGACTGGCCTCTTGATATGACTGAGCAACATGGCGTGGATACAAATTCAGT  
GAACAACAGAGACAATGGTG  
AGCTGATCAATATTGGCAATCATCTGAATTTAATGATGCATCAAATGATATGAATCTGGATCTGTTCTGGGATGCCAAC  
GAGAATCTTCCGACTGATGG  
ATCATTCTTGGAAACAATGATATTGCAATTGGGAATGGGAGTAGATCTACTGAGGCTGATCCTCCTGCGAATGACATTC  
TAGACGAGTATCTTACACTC  
CCTGATGATGATATTTACAAGTATATATCTTTTGATTCTCCTCAGATTCAAGAGAGTGAAAATTTTATCCCAACCAAGG  
ATCACCTTTCCTCGGCAGA

ATGTGGAGGGAGAAACTGCTGATAAAGCTGTGGTTAGTAATCATAATTCTGAATCACAAACCAGAAATGAGGCTTCTTCA  
GTGCAGAATACACATGAGGC  
AAAGTTTGCACCAGGAAGTACAAATCCACTTGTTAAGCAGGCCTATGGTTGGTTAGCCGGCATCCCTGCTGCGCCTGCAC  
ATGCTATGGAGTTTCTGCT  
AAGGAGATTGCTCTTGGGCTTCATCCTGTAGCTCAGTCTTCCCATCCAGCTCATATAACTACAGGTATGATCAGCATAAC  
AGACATTACTTTAAGAGGCA  
ATGCGATGGATTGGACGATGGGCAAAAATGGAGGGTTAGCACTGTAATATCCACTGGGTTTTGTCAACCGGATGTTAAT  
TCGGATGCTTTGATACCTGT  
TTCTGGCAAGACTGCATTTGTGTTGTCGCATGGCTGGATTTTCTGACTGGTTTCTGTCTTATTCTTCACTGAGTT  
GCAAGATCGGAAGCATCATG  
TATACTGGTAAATGA

>LOC\_0s02g57650

ATGAGCCAATCGCCGCGGACTCCTCCTCCGCGCGCGGTGCCCTGGCGCCGGGTTTCGCTTCCACCCACCGACGA  
GGAGCTCGTCTCTACTACC  
TCCGCCGCGCATCCTCGCCGCGCCTCCGGATCGACGCCATCGCCGAGGTCGACCTTACCGCCTCGAGCCGTGGGAC  
CTCCCTCCCTCTCCCGCAT  
CCGGAGCCGCGACGCGCAGTGGTACTTCTTCGCCCGCTCGACCGCAAGGTCACCGGCGCCGGGGCCGGCGCCGGCGG  
GCCCCGGGAACAGGACCAAC  
CGCGCCACGCCGCGGGCTACTGGAAGACCACGGGAAGGACCGCGATGTCCACCACCGCGCAAGCTCGTCGGATGAA  
GAAGACGCTCGTCTTCACT  
CCGGTAGGGCGCCAAGGGCCAGAGGACCAACTGGGTCATGCACGAGTACCGCCTCCTCGACGCCGACGGCACCCAGGAT  
CTGCATGTGGTGTGTAGAAT  
CTTCCAGAAAAATGGATCTGGGCCACAAAATGGTGCACAGTACGGTGCGCCATACTTGGAGGAAGATTGGGAAGAGGAG  
ATGATGCAATTGAGAACATG  
CCTGCCAGTGGCGCTTTCGCTGAAATGGCTGCAGTCACAGATACTGCAGATGAGTCGACTGAGGAAGATGGGAATTTCTC  
CCTTAAACTAATGATGAGC  
CTTTACAAACCAAGAATACCAGCCAGAGATAACTCCTGTGAAAGCTCAAGGTTCAAATGAGGAGACCAATGGCGGTGGT  
TACAGTTGTGATGTTTTTC  
TCTGGATGAGATTTTGCAGGAACCTGAAAATGTCTGCAAAAATGAAGAGCAGAATGCCATTGATGACAAGTCACTATCG  
CAGAGTTATCTGGATACCCA  
AGGCAAGATGATGGCTATGTAGGCGAGAATGGTCTGTGAATTGGATTGACCCTTCAAATGGTGATAATACAAACTGGCC  
TTTGAGAGCATATAGTACTC  
AGAACCATGTCAATGGAACACTTAGCGCTGATGGTTTCTTTGACACGGTGAATGGTACCAACTCATATTCAGGTCCTTCA  
GATAACCAGAACCTGTATTT  
GCAAGATGATGGCTTACTTCTTCTCATCAAGTGGGCGATAACATGCCATTTTATGACGCATCATCTAATCACAAATGGG  
TAGATGGAAGGATGATTAT  
TTGAATTTGAATGACCTCCTCTACCCGCCAGCAGAAAAATCAACCCTGTTTGTGCTGGGGATGACCTGATGGCTTACTT  
CGATGCCACGGAGGATGATT  
TCAAATTTGATATTATGGGCACAGAAGATTCTAATTCTCAACTCCAGACATGTGCAACTTTGTCCAAAAGGATGATAAC  
ACAATAAGTTTACATTAGA  
TGGGATCTCTAATACCGCTTTGTATGGTGCTTCTTCATCTGGATCCCATGGCAATATGTATCCAGACACTGCAGTACCAG  
ATATGCCGATGGATGACACT

GTTGACAAAAGTTTCGGAAAGCGCCTTGCCAGCATGCTGGGTTC AATTCCAGCTCCACCCGCAATGGCTTCAGAGTCCC  
GCCGAGCACAGGAAAATCTG  
TTGTCCCCTTAGTGCTGTCAACCCGAGTAGCTCTATCCGTGTC ACTGCAGGCATTATCCAACCTCGGTGGTATCACTTTT  
ACTGGTAGCACCGAGCACCT  
GCAGAAGAATGGAGATTTCAATTTGCTCCTCTCTTCACTGTCGAGGGCGACGTCTCAACCAAATCCATTGGTTTTGAAC  
CGGATACGCAGATGAGCACC  
ACGCCAATGGTGTGCGCAGCGGCATGTATCTTTTCTCGTATCGGCGATGATTCTCATGTTGAGCTACAAAGTTGGGCT  
GTGTATCTACAGCAGGTAA

>LOC\_0s03g02800

ATGGCGCCCGTGAGTTTGCCTCCAGGTTTCAGGTTCCACCCACCGATGAAGAACTAATCATCTACTACCTTAAGCGGAA  
GATCAACGGAAGACAGATAG  
AACTCGAAATCATTCCAGAGGTTGATCTTTACAAGTGTGAGCCTTGGGATCTGCCTGAAAAATCCTTTCTCCGAGTAAA  
GATCTCGAATGGTACTTCTT  
CAGCCCTAGAGACCGCAAGTACCCAAATGGATCAAGGACGAACCGTGCAACAAAAGCCGGATACTGGAAGGCAACTGGGA  
AAGATCGAAAAGTGA ACTCA  
CAGAGGCGTGCAGTTGGTATGAAGAAGACTCTTGTGTACTACCGTGGTTCGAGCTCCACATGGTTCTCGCACCGATTGGGT  
CATGCACGAGTACCGCCTCG  
ATGAGAGGGAATGCGAGACTGACACTGGCTTACAGGATGCATATGCTTTATGCCGGGTGTTCAAGAAGACAGCGCCCGG  
CCAAAGATCATAGAGCATT  
TGGTGTGGTGCACCACCATGTCGAGCAACCTCAATGGATGACGAGCAGTATCGATCGCTCCCCAACGTTGGACGTGTCGT  
GTGATGGAAGAGGTGATGAC  
TTTGAGAGCAGCAGCTTCTTTCCCAACAGAGACGCCAATGGACTCCATGCACGGTGGGTTTGAATGCAGATGAGTGC  
ACCTCACGAGGATGGCAAAT  
GGATGCAGTTTCTGAGTGAAGATGCCTTCAACGCCACCAATCCATTCTTGACGAACCCAGTTTCTGCCAACTTCTCATGC  
CTTCCATCCAAGGTGGATGT  
TGCACTGGAATGTGCGAGGCTGCAGCACAGGCTCACCTTGCTCCCTTGAGGTTGGAGGATTCCCACAGGACGTCAGCC  
TTGACACGAAGATTGGCATA  
CTTCGCAGTAACCCCAACGAAGTTGACATTCTCCAAGAATTCCTGTCAGTTGCGACTGCCTCTCAGGAGCTAATTAATGG  
CTCCACCAGTAGCTACCCTG  
AAATGTGGTTAGGAGCTAGCACAAGCAGTGTAGCTACGTCAATGAACTGTCCTCTCTAGTTGAGATGGGCGGCGTTGGC  
ACTTCTAACCACCACGAATC  
CGCAAGGCTACAGGTCGAGATCGCTGACATGGAGGTGTTCAAGGACGAGAAGAAGCGGGTGGAGAACCTTAGAGGAGTCA  
AGTTGGTGAACAATGACCTT  
GGGGAGATTGTTGTAGAAGGAGATGAAAGCAATCCAACAGAAGACATCATCGCGCAGTACCCTATAAAAGTCACTGCAGA  
TAATTCAGGAGAAGCCGGTC  
ATCGCATACCGATCCCCTGACGTAGGCGGCATCGACACTGCCCCGATCTTCTCGCAATCTCAACCTGACGACTTTGCT  
GCTGGTTTTCGACGACGTCAA  
CCCTAATGCATCTTTGATCTGTACGAGAAGGTTGACGTCAACCACAGGCTATTCGTTTCAAGGGTCGCTGCGGCGAAGA  
CATTCTTCCACCGCATTGAG  
CCATCGAAGAAGGTCAGCTTCCACTCGAACCCGGCAGCAACCGCCGTCAGTAAGGCGACCGAGAAGTTCCATTTCCCCGT  
TACGACCAAAGTTAGTGGTA  
GGGTTTCCATTTT TAGCAAGTTCAAGGCACTCATAAGGGACAAGTTCTTGATGATGAGGCCATCACATTCATAACCAAAGG  
TTGGGCAGCAAAGAAACCAC

AGTGAATGAGCTGCTGCAGATTGTGTCACTCCTTTTAGCACCGAAGCAAATCAATGGCTGCCCTACTGAGCAAGAGCTGG  
TCAAGAAGAAGGCGAAAGAA  
GTGATGAAGCCGGGATGGGGTCGTGAAGGGAGCAACAAATTGTGGCTTCCGCTCTCAAAGGGAAGGGCATTTCAGCAT  
GTTTTGAGTGGGAAATGGA  
CGTTTCTAACCTCCGCGTTGGCCATCAGCACTCCAGCTGAGTGGGATCACTAA  
>LOC\_0s08g06140  
ATGACGGTATGGAGCTCAAGAAGCTGCCGCTCGGGTTCAGGTTCCACCCACCGACGAGGAGCTCGTCAGGCACTACCT  
CAAGGGGAAGATCACGGGGC  
AGATCAGGAGCGAGGCCGATGTCATCCCCGAGATCGATGTCTGCAAGTGCAGCCGTGGGATCTCCCTGATAAGTCTCTG  
ATCCGCTCCGATGATCCGGA  
GTGGTTCTTCTTCGCGCCGAAGGATAGGAAGTATCCCAATGGGAGCAGGTGCAACAGGGCGACGGAGGCCGGTACTGGA  
AGGCCACCGGAAGGACAGG  
GTGATCAGGTCCAAGGTTGACAAGAAGAAGCAGCAAGTAATTGGCATGAAGAAGACGCTCGTGTTCACCGGGGGCGTGC  
GCCGAAGGGTGAGCGGACTG  
GGTGGATCATGCATGAGTACCGCACCACCGAGCCGGAGTTTGTAGTCCGGTGAGCAGGGAGGTTACGTTCTCTACCGGCTG  
TTCCGAAAGCAAGAGGAGAA  
AATTGAGCGACCCAGTCCGGATGAAGTGGATAGAAGTGGATACTACCCACTCCTTCTCGTTCAACTCCTGATAACATGG  
AACCAATTGAAGACGGAAAT  
ACACCATTAACAGGGAATCTCCAGAATCTGCTCTGCATGAAAGCCCAATTGATTTGCCTGCTCTAACTGAGGCTCAAGC  
TGCGCCAATTACAAGGTGGC  
TTGCAGACAGAAGTATAACGCGACAACAAATGAAGTAAACATCTCTCACATGCCTCATGAGGCTTGATGGAGGAGCT  
AAGCAGGCTAGCCCTCAGC  
TGGTGCTTTCCCTCAGCTGATTGGTTCACAACAGAATATCCATGATAATAATGAATTAGCCACAGTTTCTGCACCCATGC  
TACCACATGAAGACTTCAAT  
AATTTCCCTCTAGGAGCCATTGGTAATTTTGTATGGCAATATGAATCCTCGAGATCCAGTGGAGGAGTTCTTGAATCAAAC  
CATTGCTGATCCAGATGAGC  
ATTCATCAACAACATCAAAGGCTCAGTATGATTCGGACACTGGAATCATAACCAACTGAGTTTGAAGAACCATGGGGTATG  
CAGGGTGAATTCATGGATGA  
TCTGAGTGGGTTGAAAAATTTAGATTTCTGGCCAGATGACCGAAATCCCAGTTGAGTGCCTGTATGAGGACACACCAT  
TGCTGCCTTATGATAGCACC  
GACCAGGATGTGCTCTCCATGGACTCTGGTGTGAATCCTTGCAAGATCTATTCAACAGCATGGACGATTCAAACGCGAG  
GAATAATGTATGGGGCAACG  
AACCATTCTCCAGGGGACTGGATTTCCCATGTCTTGGCCGTTACAGCCGAACTCCGCATTTCCAAACCAGGGCACTGCA  
AATAGGAGGCTCATGCTACA  
GCTATCAGAATCATTATCTCCTGATTTTGTATGTGAGCATGACTAGAGATGAGTGTGAAGATGAGGAACCAGGTATTGTTG  
TAACTTCGAAGTATGTGAAT  
GAAGCTCCTGAGGAGTCAACTGCAGAAAAGGATATGCCTTCTGATGGAGATGATGCTGAGCCAACGGGTATTACTATCCT  
GAGGCGACGCCATGCTCAA  
CTGCAAGTTCGTTTTCTGATGGAGATGATGCTGAGTCAACGGGTATTACCATCCTAAGACAGCACCAAGCTCCAAATGCA  
AGCTTGCTTCTGATGGAGA  
TGATGCTGAGTCAACGGGTATCACTATCCTAAGACGACGCCAAGCTCCAAGTCTAGCTCAGCTAGTTTACTCAAC  
AGGGTGCTGCAGTGCAAAGG  
GTGCGGCTACAATCAAACCTTGTATGCAGCACCGTGTCTAGCGTTGATGGTTCATCAAGTTGCATCATAAATGAAGGTGA  
AAGTGAACGCACCATGGAGA

AACCTGAGATTGAAGAGAATGCAGGAAGTACCTTGGCTGAAGGTGGGACTTGCCATGAGGATGACCAGAAGGAGCATGAT  
GCTTCAGCAGCAAATGCTAA  
ATCTGTTCTGAGGCTGCGGAAGACAGCAGAGGGAAGCGACAAGGAGAACAAGCAGGAGGAAGAGGAGGGTGTCTTGCTT  
CACATGTGAGAGCACCAGGG  
AATAAGAGGGGATTCCCATCGTACATCATTTGGCTGGTTCTCTCTGTGGCTCTGGTCTGCTTATCTCCCTTGGGATTTA  
TGGATGGGTGTAA

>LOC\_0s08g44820

ATGAGCCACCCCTCGTCGTCCTCCTCCGCTCCCCGGCGCGGCCGAGGCCACCTCCCTCGCACCAGGATTCCGGTT  
CCACCCGACGGATGAGGAGC  
TGGTGTCTACTACCTGAAGCGGAAGGTCCATGGGCGGCCCTCAAGGTGGACGCCATCGCGGAGGTGGACCTGTACAAG  
GTGGAGCCATGGGACCTCCC  
CGCCCGCTCCCGCTCCGCGACTCCAGTGGTACTTCTTCAGCCGCTCGACCGCAAGCAGCCAACCGCGCCC  
GCACCAACCGCGCCACCGCC  
GGCGGCTACTGGAAGACCACCGCAAGGACAGGGAGGTCCGCAACGGCCCCACCACCGTCGGCATGAAGAAGACCCTCGT  
CTTCCACGCGCGCGCGCCC  
CCAAGGGCGAGCGACCAACTGGGTTCATGCACGAGTACCGCTCGACGGCCAAACCACCATCCCACCACAGGATTCATTC  
GTCGTGTGCCGTATCTTCCA  
GAAAGCCGGCCAGGTCCACAGAACGGGGCTCAGTACGGAGCTCCTTTTGTGAGGAGGAGTGGGAGGAGGATGACGAGG  
ATGTTGGTTTGGTACCGGTG  
GAGGAGAAGGACAACCTCTGATGACCAGGAAAAGGAAATTTCTGGTGTATGGAGAAGGGCTATCTCCAGATGAGTGACCT  
CGTTCAGAACTTGGTTGATC  
AAAATGAGAATGGTACCATTGCCTTGCCAGTTTCTGACAATTCAAAACAACAGCAACCATTCTGAAGACGTGGATGGAAT  
TCAGGGGACATTTTAAGTGA  
CCAAAACCTTGGGTCTAACTTTCTTACCATGTTGAGCCTGTGGAGCAAAATGGCCTAGTGCTTAATGAAAATATGTTTT  
CTAGTGCCAATGCTGGAGAC  
CTTTTTAATATATCTAGCCCAATGATGGATTCCTAGAACTGAAGGATTTTGCAGATATTGCAGATTTGGAGAATCCTTT  
AGCCAATGAATCCACCATCT  
GGCCTTCTGATGGTTGGCCCTGGAATCAACTGATTCCATGGAGGCTGTGAATGGGGCTAGCAATGAATTTTCTCCCTTA  
GCTGGTGAACAGATATTCCA  
GCCAGAAGAATTGGAACAGTTGTTACAGTCACTGCAAGAAGACTCTCATATGGGTTCAACTATCTCTGATCCCCACATT  
CATCTATAACAAAATTTAGCT  
AAGCCAGAGGAAGATTGTCTAATGTTCTATGATGCACCCTTTGATTCTTCAATGTGTGATGATGGTTTTAGACAGCTCAA  
TGGATTTCTTGGCTCCCAT  
CGACCAATCTATCTGGTATTGACATGGTGGACGATGGTATGCCGTACTATGATGCGATGGATGATAACTTGTTTAATGAT  
CTTCTGAGCTCAGTACAGCC  
ATCAGCTGGTAGCAGTCCCATGCTTTTAGTGGGCCAGTCTTACTCAAGAGGTCAACAATTCAACCTATACATATAGTC  
CAACTCAAAAGGTTTTAGAA  
CCTAATTTTGTAGTTGGTGCCCATCATCTGCTAGGTTACCTGAAGCGGGTAGTCAGTTAAATTATGTTGTTTTACCAGA  
TCCCAGACCAAGAGTAGTC  
TGATCGGAAGCGTTTTGTAAAGATACTGGATTCAATCTCTGCTCCCCCTGCTTTTGCAGCAGCAGAGTCCCAGCTAGC  
CTTCGCAAATCCTTGGCTCC  
TATTTCTGGAGCTCATCACAACACTATCCGTGTCTCTGCTGAAGTAATCAGCATAGGAAGTTAACTCCTGATTCTCAAG  
ATAAGTGGTCCCTTGAGAAG



GATGAAGGCATGGAGCTGCTCTTCTCGGCAGGTTTTGAGCCTGATACCCGTGTACACTTTGGCTGCAACACAATAACCGC  
AGTACTGCGTGGTGGCTTCT  
GCCTCTTCTCTTTTCAGCAATAATGCTCTTGGTGAGCTACGAGGTGGGCATGTGCATCTATGGCAAGTAG

>LOC\_0s09g32040

ATGGGGATGGAGAACCCGCCCTCCGGTGGCCGCCGGGTTCCGCTTCAGCCCGACCGACGAGGAGCTCGTCTCTACTT  
CCTCAAGCGCCGGATCGCCA  
CCGGCCGCCACCCCTACATCGCCGACGTGACGTCTACAAGTCCCACCCCTCCACCTCCCTGAGAGGTGCGGCGTG  
CGGACGGGGACAAGCAGTG  
GTTCTTCTTACGCCGATGGACCGCAAGTACCCCAACGGCTCGCGGGCGAGCCGCACCACCGGCGAGGGCTACTGGAAGG  
CCACCGGAAGGACCGCTCC  
ATCTGCAACGGCGGGCGGGCACCCTCGGGCGCGGGTGGGGAGCAAGAAGACCCTCGTGTACCACCACGGCCG  
CGCCCCGCGGGGAGCGCT  
CGGACTGGGTCATGCACGAGTACACCCTCTCGCCGACGCGTCCCGCCCGCGCGGACCGCGAGGCGTACGCTCTG  
TACAAGCTGTTCCACAAGAG  
CGGCGCCGGGCCAAGAACGGCGAGCAGTACGGCGCCCCCTTCCGGGAGGAGGATTGGCTCGACGACGACGACCACC  
ACGACCAGCTTCTGCTGAG  
GCGGCTCTTCCGGCTCCAGCCACAAGTGGTAGAGCTGCAACAAGTGGAGGAGCATGCTGACTTTGAGCTTCCGGGTGG  
GGATCTTGATGTGCTCCTTG  
CGCAAATGAAAATGATCAGGATATAATCGAAGCGCAATTGGATTCTCAACTCATGTTACTTCCAAGTTCAGATTGAG  
CATCGTGTTCATCAAGGTTG  
GCTCAGTGATGATGGCGAAAATCAGATGTTGCGGATGCTACGACTAGTGGCAGTGCTTTGTTGATGGCAGAGAATACGT  
GCGCTGAACTCCAATTGAT  
GGTCTCGAGCAACTTCTGATGCAAATATCGGATGATCAACAGACAGTTGAAATGCTCTCTGGTTTCTCAGCATCCGTCC  
CCAATCGCAGCTTCAACATG  
ATTATCATCAGGGTTGTCTTGGTGTTCATAGGGAGGAGGTTGGTGTTCAGATTCTACCACTGTTAGTAGTGCTGTGGTG  
ACAGAAGAATGTACTGTCCG  
TGAGCTTCAGGATATTGAAGGGCTTCTGATGCAAATAGAAAATGACCAGGAAAATGCCGAATCACTGCCAGATTTCTCCA  
CACCAGTTCATCTCCATGAT  
TGTCATCAGCCGCTTCGGAGATTTTCAAGGAAGCCAGAGGGCTACATTCAACATTGCAAATCTTTCTACTATGGTGCA  
GGAAAGCCCAAATTTTGATC  
TGCAAATGGTCCAAGTAATCAAATTAAGTCTATTCTCACCACCGAGCCAATGAATGGAGAAACAAATGCTGTGGAA  
GAAACAAGTCTCTGCGCTC  
TATGTCAGTATTGGGTAGTTATGATAGGCAGGATGGTGATGATGAATTCCTGAAATCAATGATTTCTTCGACCCAGAAG  
ATTTAGAACAGATTTTGGGC  
AGTACAAGAAGTCAGAACTTGATTCTGCTGATGATGGAGTGTGGATAGTTGCAATACTCTGATGCTCCAATGTTTCT  
GCCTGGTTCATTTGACAGAA  
CTGGTGTGGTGGCTGAAAACCATTATGTTGAATTTGGTGTAGTGAATTCAGAACCCAGGGATTTGAGCATACAAGTAA  
TTATTGGCACATAATCAAGT  
CGCTCTAAATGTGCGGAACCATATGAAGGACAACCATGTTGTCTTCTCACATTCATCAGATGCTACCATTATTCATACAG  
TGAATGAGCAACCGCCTAAC  
CGGAGTTCAAATGCTTACAATCATGGTTCATGGGGCTCTATCTGCCTTGCTCGATTCTGTTCTTAGCAGTCCAGCTAT  
GGCTGCTGAAAACATAGGTC  
TTAACAGAACTGCAACGCATTTGAGCTTTAGGTACAACAACCTGCAAGAGAAGAAGTTAGCAGTACTCTTATCAAC

ACCAGAAGAAGAGGCGGTGG  
GCTAATTTTCATCTCGTTAATGGTTTTACTTGTGCTATCATGTGGACCTTTAGCAATGGGTCTGCAGTCAAGCTTAGCA  
AGGGGTATGGAAGTTTCCC  
TCTACATAA

>Medtr0036s0150

ATGTCTCTCTACCAAGCTCTGGATTCCGATTCCACCCTACTGATGAAGAGATCGTTTGTTTTATCTGAAGCGGAACT  
CACCGAAAGTTACCACCCT  
GTTTTGATCATCTTGCTTTCATCGATATCTACAAGTTGAACCATGGGATCTTCCCTAATATGTCCAAGCTGAAAATAAG  
GATTTGGAATGGTACTTCTT  
CAGTGCCTGGACAAGAAGTATGGCACTGGATGCAGGACGAATCGTGCTACTGATCGAGGTATTGGAAGACTACTGGAA  
AGGATCGGGTTATCAAAAAC  
GGGAGGAGACAGTTGGAATGAAGAAGACCCTTGTTTATCACCTGGGTGGGCCCCACATGGTAACCGAAGCAATTGGGT  
CATGCATGAGTATAGGATGA  
TTGATGAAGAATTGGCCAAAACCTGGAGGGCAGGATGCTTATGTGCTGTGTAGGATCTTCGAGAAGAGTGGTTCAGGGCCT  
AAGAATGGGGAGAAGTATGG  
GGCTCCCTTTGTAGAGGCAGAGTGGCAGAATGTTGATGAACCAGTCAATCCCTTGCACCGTTGATAATCAGCTTTTGG  
AACAAGTGGCTGCTCCTGCT  
CCTGATTACGCTGAATTTTTGCAATCTTTGGTGGCTTTTGATAACGATCTTTTGAATGAAAGTGTGCCTACTGCTACTGA  
TGATAATTATCTTGAATCC  
TTGACCTTGACCAGGAGCTTGATACCAGTGTACAGTTGAAAATGCTGATTTGCCACCAAACCTTCTATTATGGGGAGTGT  
AGTAGCTTTCCTCAGCATT  
CCAATCGGAAGCTGCTTTTGGTATTTATGATCATCAGGTTGGTGGTCTATATGGTGTGGATTCAGTGCAAGATGGTTACA  
ATGGCGAGACAAAACATAAC  
GAAAATCCTCTGAACTTCGATTTTGCCTCTGAGGATCCAGATCTGTATTTTGTGCGGCTGAATATCTTAGGGGTTGAA  
CGAAGAATATGTTGAAACCA  
ATGATCTTAAGAATCTTGATGGGGTGGATTCCACCGTGATAGATCCTTCTGTTTCTGAATTGCTAGATGAGTACCTGAA  
TGCCCTGATGAAGAAGATAT  
TACCAAATATATATGCTTTGATTCTGAAAGCCCCATTGCTAATCATGTTTTTGAAGCACAGTATAGTAATGGAGTTTTAC  
CTAAGGAGGATCAAGGAGCT  
GCATCAAATGGGTCTCAGGAGGTGAAAATGCTTTTGTAAAGCAAGCAATAAATTGTTGGCCGGCATAACCAGCTCCTCC  
TGCATTTGCTTCTGAGTTTC  
CTTCTAAGGAGTTTGTGTTGGGATGCATTCGCGAGCTGAGTTTTCCAATTCAGCTCATATAACTACCGGTATTATTAGC  
ATTACAGACATTACTTACAG  
TGGCAATATGATGGATTGGATGGCCGGCAAGAATGGAGTTTTGACACCATAATGTCTAATGAATTTCCCAAACCTGCTG  
CTATTAACCTGCTACTGGC  
TTGGTCTGTAGAAAACCTGCATGTATGTTATCACATGGTTGGGTTTACTTGTGAGGTTTCTCAGTTGTGATTCTTTCAAT  
GAGTTTGAAGATTGGAAGCT  
TCATGTATATGGGTAAATGA

>Medtr1g090723

ATGGAAGAAACCGCTTTCTACCAAGTCTGGATTCCGATTCCACCCTACGGATGAAGAAATGTTTCGTTACTACCTCAA  
GAAGAACTCACCGAAATT  
TACCTTCTGCTTTGATTATCTCGCTGTCATCGACATCTACAAATTCGAGCCATGGGACCTTCCCAAGTTGTCGAAGCTG

AAGACAAGGGATTTGGAATG  
GTACTTCTTACTGCGCTGGACAAAAAGTATGGTAATAGTATCAGGACGAATCGTGCTACTGATAGAGGTTACTGGAAGA  
CTACTGGCAAGGATCGTGCC  
ATCAAGAATGGAGAGGAGACTGTTGGAATGAAGAAGACACTTGTTTATCACTCGGGTCGGGCTCCGCATGGTGATCGAAG  
CAATTGGGTGATGCATGAGT  
ATAGGATGATTGATGAGACTTTAGCCAAAGCTGGAGTTCAGAAGGATGCTTATGTCCTGTGTAGGATCTTCGAGAAGAGT  
GGTTCGGGGCCTAAGAATGG  
GGAGAAGTACGGGGCTCCCTTTGTTGAGGAGGAATGGGAGAGTTTGGTGAACAAGTGCTACCCTTGCCGCTGTTGATA  
ATGAACCTTTGAAACTAGAA  
GGGTTTACTCTGATGTTGATGAACTCGTGAATCCCTTGGCAGTTTCTGTACCTGATGATGTACTGGTGGATCCCTTGA  
TGTTTTTTATGACGAGCTTT  
GGAATGAAAATCTGCCTGATTCTACTTATGAGGACTTTTTTGAAGCCATGACCTCGACCAGGATCTTGTACTAGTAAC  
ACAGTTGGAAGTGCTGAACT  
TCAATCCAACCTCTGTTATGGAGAGTGTAGTACCCATCCTCAGTATTCCAAGCATTTATTAATGAACGTAAGCAATCGG  
AAGCCACTCTTGGTGTGTAT  
GAATATGAGGTTGATCAGCCTAATAATATAGCTGATCTATATGGTGGGAATATCAATTCAGTGCAAGATGGATAACAATGG  
TGGGACAAACCATAACGAAA  
ATCCTTTGAATTTCAATTTTGCATCTGAGGTTGATCAGCCTAATAATATAGCTGATCTATATGGTGGGAATATCAATTC  
GTGCAAGATGGATAACAATGG  
TGGGACAAACCATAACGAAAATCCTTTGAATTTCAATTTTGCATCTGAGGATCTGGGTCAAGTCTTTCATGCCCTGATT  
ATATTACTGGTGTGACTGAT  
GAGTACATGGAAACCAATGATATTGCTGAGATGGATCCTTCTGTTGCTGCAATGCTAGACGGGTCCCTTGACAGCCCTGA  
TGATGACATCTCCAATTATA  
TATGCTTTGATTCTCCTTTGAATGCAAGGAGTGAAGCCCCATTGCCAGCTATGGACAGCCTATCATTGAGCAGAATGTG  
GAGGGCGAAACCTATGATAG  
TTCCTTGACAAACAAACATGTTTTTGAAGCACAACTAGTGATGAAGTTTTACCAAAGGAGGATCTAGCAGCGTCAAATT  
GGGTCTCAGGAGATGCAAAC  
ACTTTTGTGAAGCATTTGTTGGCCAACATACCTGCTCCACCTGCATTTGCATCAGAGTTTCTGCTAAGGAGTTGGCTTG  
TGAGATAACCCTGCAGCTG  
AGTCATCCAATTCAGCTCATATAACTGCAGGTATGATCAGCATTACAGACATTACTTTAGAGGCAATGCGATGGATTGG  
ATGGTGGGCAAGAATGGAGG  
TTTTAACACCGTTATGTCTACTGGGTTTTCCCAAAGTATGTTAACCTGCTACTTTGGTGCCTATTTCTGGCTTGGTCT  
GTAGCAAACTGCATTTATG  
TTATCACATGGTTGGGTTTTCTTGATGGGTTTCTCAGTTGTGATTCTTTCACTGAGTTTCAAGATCGGAAGCTTCATGTA  
TACGGGTAAATGA

>Medtr1g097300

ATGGGTGCAGTTTCGGAATCTGCTTCTGCTGATTGTTTCAGTGAGGTGATGTCGTCGATGCCCGGTTTCCGCTTTCATCC  
TACAGATGAGGAGTTGGTGA  
TGATTATCTGAAAAGGAAGATTTGTGGGAAGAAGTTGAAGTTCAACGTTATCAAAGAAACCGATGTGTACAAGTGGGAT  
CCTGAGGATTTGCCAGAACA  
ATCTTTCTTAAAACTGGAGATAGGCAATGGTCTTTTTCTGTATAGAGATAGGAAATATCCCAACGGTGAAGGTCTA  
GTCGAGCAACTAGACACGGC  
TACTGAAAGCTACTGAAAAGATCGAAATGTGATATAACAATTCTCGGTGAGTTGGAGTAAAAAGACACTTGTTTTCTA

TCTTGGCAGAGCTCCTAGTG  
GTGAGCGAACTGATTGGGTTATGCATGAGTACACCATGGATGAAGATGAGCTTAGGACATGCCGTGATGTTAAGGACTAT  
TATGCACTTTACAAGGTTTT  
CAAGAAAAGTGGACCGGGTCCTAAGAACGGTGAGCAGTATGGTGCACCATTTAAAGAAGAAGAATGGGCAGATGATGATG  
TTGTAGATTTTAATGTAAT  
TCAGTTGACCGGGAGGTTCCAGAGGCTGCTATTGACAATGTTATTGATCAGCATCAGCTGCAGCCGTTGTTTGTATGATGA  
AATTGATGAAATCATTAAAG  
GGATGCTTGATGTTGAGCCTGTCCCTGACCAGCAACATGTGAATGGTTATGTTGACTTTCCTCAGGTTGATGATGAAGAA  
ACACGAAATGTGGTCATGGA  
TCAATTCTACGAGGCCATGGTATTCCTGATCCAAGTAAAAACGCAATCTAGCAGTCAGCTTTATGATGCGCAGCCCA  
GCTTTGACTTCAATCATCAA  
TCAGTTGATTCTCACTTGTGTATTTCTGAAGCACCTGAGGTCACTTCCACTCCGAACATTCAAAGCGGGGAGGGGCTTGT  
CTTTTATGAGGAAGGCTTCT  
TGGAAATTAATGATCTCATTGATACCGAATCTACATTTCAAATACGGATAAGCTTAACAACGATCTCATTGAGAACCTC  
CAGTTTGAAGATGTGTTGAG  
TGAATTTGATCCTTACCAAGATGCAGAGATGTTTCTTTGTGGTCTGGGGTCTATTAACGAAGAAACAGTTTACATGCAT  
ATATGAATAACGCTGGCAGC  
AATATTGAAAAATCAGAGTTACCAGTTGTTGTCCAATCCAGAAGACGTAAATCAAACCTGTTGATGAATTCTGGATGCATGT  
TGAAAGAAACACCCGCAGTC  
CAGCTGAAGTTATGATGGTTCTTTCTCTCTAACAATCCAGGTGTCGTGTGTGACTCTGTGCGCTTTCCTACTGAAAGC  
ACTGAAAATCAAAGAAGCAC  
TGTCGAAGATGTTAAACAAGTAGATTATCCTCTGCTCTATGGGCCTTTGTTGATTCAATACCTACTACTCTGCATCAG  
CTGCTGAAAATCCTTTGGTG  
AATCGGGCTTTGAATCGAATGTCTAGCTTCAGCAGGGTGAAGATCAAGCCCACCGACAACAACATTGCTGCAGGTAATAA  
TGACACTGCAACTATGAAGA  
GAGCAGGCAGAAAGGGAGTCTATTCCTTTTCTCCCGATTCTTATTGCTTTATGTGCTTTCTGTGGGTTTCTATTGGA  
AATTTAAGACTATTAGGGAG  
ATGTGTCTCCCCTTGA

>Medtr2g086880

ATGGAGATTGTTGTTTCAAAGGAAGCTCAGATGTCTATTGCTGCTTCATCTATGTTTCCTGGTTTTAGATTCTGTCCTAC  
TGATGAAGAGTTGATTTCTT  
ATTACCTTAGAAAAAATTAGATGGTCATGAAGAAAGTGTTCAAGTTATTTCTGAGGTTGAGCTTTGTAATATGAACCT  
TGGGATTTACCAGCCAAATC  
ATTCATTCAATCAGATAACGAGTGGTTCTTCTCTCCTCGTGAAGAAAGTATCCAAATGGTTCACAAAGTAAAAGAG  
CTACCGATTGTGGCTATTGG  
AAAGCCACTGGAAGAGCGCAACGTGAAATCGGGTTCTAACGTCATAGGTACGAAGCGAACTTTGGTGTTCACTTAGG  
CCGTGCCCTAAAGGAGAAA  
GGACAGAATGGATTATGCACGAGTACTGTGTCAGTGACAGGTCTCCGATTCTTTGGTTGTTGTGCTCTCAAGAGGAAC  
ACGGAGTTTCGTGTTAACGA  
TGCTTCAAATAGAGCTTCTTCAAGTCAAATAAATCCTGTACATTCACATGAAAGTGATTGTGCTGGTCAAATAAACCCAG  
TAAATTCACATGAAAGTAAT  
TGTGCTATCTCAGAAGCGGTACTGATCATAGAGAAAGGGTATCTGTGAACAAGAAAAGGAGGTTGATGGTAGTTCGAA  
ACGGGAAGCAGCAGTTATG

GTTTCAGCTTCAATGGAACAAATTGATTCTATGTCTGAATCAAATCAGCGACCAGCTAATGACGGTTTTTTGACAGACTCT  
TCGGGCCAGCTAAAGATGGA  
TGAAGAGGATTGTTATGTCTGAGATATTAAGGAATGATATCATAAAATTAGATGAATCATCAATGTCTCAAGGAGCTCAA  
CAAGACCAAATAACCTTGCA  
CATTCTCATCCATGCCAAGGCACTGCACAACGGAGAATACGATTAAGGGTCCGAAATCAACGCATTCTCAACCAGGAGC  
TCGTTTCTCAAAAACAATGC  
ACCAGTCCAAGAGTAGCTTCATTGCCAGAATGACGAACCGTTTGATGATATTTGCTTTCTCGTTTTCTACTCTCACGGCT  
ATATTATTTTGGTCTTCATT  
GGGTGGTCACAAACAAGTTAGAAATATTGTAGGAAAATTCAGAACCCTACGTTGGATCCATTGGACCAGTGTCTCAA  
CCATAACATATCGCAAACCT  
CATCTCCCCGAAAACGCGTTACTCTGCAGGTTTCAATCACACTCATCACCGTCGTCGCTTTCACCTTCCAACCGACCTC  
AACCACCGCGTCACGTCCT  
CTCCGTTTCCATATCTTACCCTCCTCCAAACTTACTTTCTCACCCCCAACCTCACACTCTGAGGAAAGAGGGGAAACC  
CTAAACTCCTCACAGATCGA  
TAATGAATCTAGCTTCTCCTCAATAACACTCTCCGAGGAATCATGTCAAGGCCTATGTTGCTTGTTCCTTGTGTTGATTA  
TACTTATAATCACTTCGCAA  
TTCGAGTGGAAAGCAACCCTGTGTCTGATGTTGAGTCCAACCTAGTGTAACCTCAAAGCAACATCGTATTTCTAATGC  
TGAAGAACTGTTAAAGAGA  
AGATTATTTTAGTACAGGAGAAGAATATTCGAAGACTTAATGAACTTGTGCGGCATCTTCAGGAACAACCTGCAGCAGTGC  
AAAGGAAGCAATGGAACAT  
AAATAGCACCGTAGGTCCTAACTGAGCGGATTCTTGAGCTTGAGCGACAACAAATTTTAGAGGATTA

>Medtr3g064580

ATGGCACCTGTTTCATTGCCTCCTGGTTTTAGGTTCCACCCACAGATGAAGAACTTGTTTCTTATTACCTCAAAAGAAA  
GATTAATGGCCGTAGGATTG  
AGTTGGAGATCATCCCTGAAGTTGATCTCTACAAGTGTGAACCATGGGACTTGCCAGGGAAGTCATTGCTACCGGAAAA  
GATTTGGAATGGTATTTTTT  
CAGCCCAAGAGATAGGAAGTATCCAAATGGATCAAGAACCAATAGAGCAACAAAATCTGGATATTGGAAGGCAACGGGGA  
AAGATCGCAAGGTGAATGCT  
CAGACTCGCGCGTTGGAATGAAGAAAACCTAGTTTACTATAGAGGAAGAGCACCACATGGATCTCGCACTGGTTGGGT  
TATGCATGAGTATCGTCTTG  
ATGAAAGAGAATGTGACAATCCTTCTTCTGGCTGCAGGATGCATATGCTCTTTGCCGTATATTCAAGAAGAGTACAGTG  
ATTGCTCAAAAATTGGGGA  
GCAATATGTTAATAATGTTGCCAGGCATGCAATCATATTACAAGTGATCAATCATCAAGCATTGAGTTGTACTCTGAAG  
GAAGAGATGAAGTTATAGGG  
ACCTCAAATATTTGATGCCATGGGATCCAAGCACATCCAAAACAATGGGACTAATACTCTAAATAACAATGGTGGGAA  
TATCACAAGGATGATGGGA  
TTTGACACAGTTCTTATCAGAAGACTTGCTCAGTCTTCCAATATCTTCATCATTTCCAATTATGGATCCACACCTAAT  
TACCCTCCATCCAAGGTGGA  
TATAGCACTAGAGTGTGCAAGGATGCAACATAGGTTTTCTTTGCCTCCCTTGGAGGTGGAAGATTTCCCTCAAGTTGGTA  
TGAATTCTGAGCTGAAGATG  
ACACAATTAGTCTCAGGTTCCATGAGTGGAACTAGAAATGAAACAGATATCTTGCAGGAAATCTATCTGTAGCTCAAGC  
TTCTCAAGAATTGATAAACC  
AATCAAACCTACTCACATGCATTTGGTGGCAATGAAAATTATGCTGCTGATCATGAAAATGATTTTACTTTTATGGTTGGA

AATAATTACAATCATGTGAC  
TGATCATATGAATTCATGAGATATATTGATGACAAAAGCATGGGAAGATCCAAACACAAGATCAATTGAAATTGGGGATC  
TTGATAATGAATCAAGGCT  
GAAAGGATGGTAGAGAATTTAAGATGGGTTGGAATGTCAAGCAATGATTTAGAGAAGAGTTTATGGAAGAGCATCAAAA  
GGTTGTTCCAATTGAGGATA  
TTTCAACCTTCAAAACAAACAGGAAAGAGAATGAGGTGCAAGTAGAATCTGAGCAACAAAATATCAACAAAGAAATCAAT  
GATGGTAACATTGATAATTT  
CTCAATGGGGTTTATCAATGATAATGACACTAATGAGAATTTTATAGATGATAGTAACATTGATTATTCAAATTCTACAA  
GCTATGAAGTTGTTGAGGAA  
ACAACAAAAGTTAGTCATGGAATGTTTGTGCTACACGCCAAGTAGCAGACACATTCTTTCACCAAATAACACCTTCACA  
ACAATAAAAAGTTCAACTCA  
ATCCAATTCTGAAAAACAAAAATCTATAGAGAATGCAGAAACAATGATTATACCAAAGAATCAAGGATACTCTCTCTTA  
AGGAAGTTTAAAGGCCAATTT  
GATGAAGTACATGAAAAATCCATCAAAGATAATAGCAAGTGAATGTGTTTCATATTTGCACTTTTTTTGGTGCTTTGTG  
TTTATTTGAAGGAGCAAGTG  
GAAGATATGAAACAAAGTCAGAATATGTGAAAAGGAAATATAGCTATGGAGCTAATAGCATGAAGAAAAATCATTGGAA  
TGAGCAAGAGAAAATTTGGT  
TTGTTGGTATCAAAAGTGGTAAAGGTTTTGAGGTGATCTTGAAGAAGATAGGAATTTTCCTAACTATATCTTTGGCTCTT  
TGTAACATGTGGGCTAACCA  
TATGATAGTTTGTATTGA

>Medtr3g093050

ATGGGCTCTCTGATTGTGTTCCATCGGTCGATGATGGGATGGCGGTGTTGTCTTTGAATTCTCTCCGTTAGGGTTTCG  
ATTCCGACCTACCGACGAGG  
AACTTATCGATTACTACTACGTTTCGAAGATCAATGGGAATGGTGACGAGGTTTGGGTTATCCGAGAGATTGATGTCTGT  
AAATGGGAACCATGGGACAT  
GCCTGATTTGTCTGTGGTACGAAACAAGGATCCAGAGTGGTCTCTCTCTGTCTCAGGATCGTAAGTATCCAAATGGAC  
ATCGATTGAACAGAGCAACA  
AATCATGGATATTGGAAGCAACAGGGAAGGATCGTAAAATCAAATCTGGAACCATCTTGATTGGAATGAAGAAGACTTT  
AGTTTTCTATAGTGGTCGTG  
CACCTAAAGGAAAGAGGACTAACTGGGTTATGCACGAGTATCGTCCACCCTCAAGGAGCTTGATGGCACCAACCCGGGA  
CAGAATCCCTATGTCTCTG  
TCGATTATTTAAGAAAAACGATGAGAGCGTTGAAGTTTCAAATATGGTGAAGTGGAGCAAATACTTACAGCTCCTTTGG  
CTGCTAATTACTCTCCAGAA  
GAAATACAATCTGATCCGGCTCCTATTACAGTATCCACATCACAGGTACGGAAGAGGATAAGCAGCTGGCTGTTATCCC  
TGATATCTCTGAGGAAACCA  
TATCTAATGTTATAACCTCGGTTGATTACCATAGCGATGGATATGATGCTCATGATGTCCAAAATCAAATTGCAAACTA  
GCTGCAGAGGATGATCAGGC  
GTTGAACTTTGACATGTATTATAACCCGAAAGACGGTCTATTGTTAGATGACAGATTATTCTCCACCTCTGGTGCATA  
TGCCACAAGAAATTTCAATTAT  
CAAGCAAACAATGAATCAGACGGTCGATGTGGACTTCAGTATGGTACAAATGAGATAAATATTTTCAGACTTTTTGAATTA  
TGATCTTAACTGGGATCAAA  
TTCCCTGTGAGGTGTCCGTTAGTCACCAGCCGAACCTCCCATGTTAAATGTTAAGGACAGTGGTTCAGGAAGCAACTCG  
GATGTGGAAGTAGCCAATAT

GACTGGTATGCAAGCTGCTTATCCTCACGAGGCAATTGACAGAAGGATTCCCTTTGCGACAACACCGTCGTTTAGCCACA  
CCTTTGATTACAGTGGTGAT  
GATCAAAAGAGCAATGTTGTTTTATTACAAAACAATTTCCAGACGGCTTTCCCGTCGGATGTTAATAATACTGGTGAAGT  
GTACAATGCCGTCAATGGAT  
ATGAGCAACCAAGGACCTGTAATACAATTATGAGCAGTGAAAGTGAATCGTAAGGAGGGCCCGCCAACACGAGACGAA  
CAATTTAAGACAAATCCGAT  
GCAAGGTACTGCTCAAAGGAGAATTCGGTTGTCAAAGATTGAACATGTCTCATGTGGGATGGTTAAGGTTAAAGATGAGA  
GTTGTACACAAGAACAACAT  
AATTCAAAACCGATTATTGCTGTGGTAAGAAAAGTTGCTTATTTGCTTGCTTGACCTAGAGGTTTTCTCTGCATGTGT  
TGTGAGGTTTGTCTATTT  
TGCAGGAGAAAGCTGCGGAAAATCATGCTTCGGATGATGAAAGTGCTATTTGTACTAATCATGCATGTAAACAGAGGAAG  
GTCCCAAGTCAATTGCAA  
TGCAAGCAAGGGGTTAAGAAATTTTTATTGCTAGGAAGAGCACCTTTCAGATCAAAGACTTCCTCCAATTGTGCTCTGT  
GGTCTTCTGTTTTGTAGTT  
TCTGCATCTGTGCTGGTTTCATTAGCAGCCTTTACTAACATATGGGGATATCTTAAATTTGA

>Medtr5g069030

ATGGGTGCCGTCGTTGAGTGTTTACCGTCGCCGCAACAAGCGGAGGAGCTGGCGGTTCTTTCACTGAACAAGCTGCCGTT  
AGGGTTCCGGTTCGGCCTA  
CTGATGAGGAGCTTGTGATTTTTATCTGAGGATGAAGATCAATGAAACGGTGATGAAGTTGGGTTATTCGTGAAGTT  
GATGTTTGTAATTTGAGCC  
TTGGGATTTGCCTGATTTATCGATTGTAAGGAACAAGGATCCAGAGTGGTTCTTCTTCTGTCCAATGGATCGGAAGTATC  
CGAATGGGAGCAGATTGAAC  
CGCGCAACAACTAACGGGTATTGGAAAGCGACAGGAAAAGATCGAAAGATTAAGTCTGGTGCTACCTAATTGGAATGAA  
GAAGACTCTGTTTTCTACG  
CTGGTCGTGCTCCGAAGGGGAGGACTCATTGGATTATGCATGAGTATAGACCTACCTAAAAGAGCTTGATGGCACC  
AACCTGGACAGAACCATA  
TGTCTTTGTCGTTGTTAAAAAGCAAGATGAGAGTCTTGCAAGTTCAAAGTGGTGAAGCGGAGCAGACTACTTCAA  
CTCCTACGACTGCCAATTAC  
TCTCCAGAAGAAATACAGTCTGACCTAAATCTGGTTCTCTATCTTCTACTAGCGACAGAAGATGAAAGGCACCTAGC  
AGCTATCCCTGAGAACTCCG  
AGGAAGCAATGTCCACGTTATAACCACAGCTGATTGCTATAGCGATGCATGTAATGCTTCTGATGCACAACATCAGAGT  
TTAGAAGTACCGGCTGCAGA  
GGAAGATCAGCTGTTAACTTGACATATTTGACAGCCACGATTTGAGCTTGAGCCATGGGATGATAAGTTATTCTCCC  
CAGCCCATGCACACTTTCCA  
CCAGAATTTGGCCATCAAGCCAACAATGAATTAATTCAGTATGGTACAAATGGGACAGATGTTTCGGACTTTTTTACTC  
GTGTGTTAATTGGGACGAGT  
TCTCCAGTGAGGCGTCTATCAGTCTTGAGCTAAGCCCAAACATTTTTAAATTCGGAAAATGGGTCGTGCAGCAACTCG  
GATGTGGAATGGCCAATAT  
GATGAACCTGCTAGCATCACATGATTATCCCAGGGAGTGACTCTGAAAACAGTGATGTAGGGTTGTTTCAGAACAATT  
CCCAGATGACTCTTTCTAAT  
GATTTTAGCATGGGACAAATGCCACTGTGGTAAATGAATATGAGCAAATGTGGAATTCGGATACTGTTGTGCGATGGCGG  
CACTGGAATTTGGGATAAGGT  
CTAGACAAAGACAAAATGAACAACCAGATATGAACCAGGTGATGCAAGCACAAGGAAGTGCACCAAGGAGAATACGATTG

GGAGGATTTGTTGCGCGTTC  
CCTGGTTTCTGAGACGACGGAAGATGGGAGTTGTGCATCAGAATATGAGCAATCGAGGATTTGGATACTGTTGCCTTG  
GTGATGACACTGGTATAAGG  
ATAAGGCGTCGACAAAGAAGAAATGAAGAGCCAAACATGAACCCAGTGATGCAAGCACAAGGTAGTGCCTGCGTAGAAT  
ACGATTAGGAGGATTTGTCA  
AGCATTCCCTGTTTCCGAGGAGACTACAAAAGATGAGAGTTTGAGGAGACGGAAGCTTCAGAAAACCATGCTGCTGCT  
GAGAGTGCTCCGTCCTAGA  
GAAGACATCTCCCATGTCAGCAAGAGAGATCTGTGAGCAACATGTTACAACCTGCAGAATCCAACTCGGGGTCGAAAACT  
TTCTGTTGGGCAGGGTTCGG  
TGCACTTCAAAGACATCCTCGATCAGCGCTATGCGGTCTACTGTTCTTGCATATTCTGCCATTGATATGACCATAACCCAA  
GTTCAATTACTAA

>Medtr5g076850

ATGGCACCTGTTTCATTGCCCTCCAGGTTTCAGGTTCCACCTACAGATGAAGAACTTGTGCTTATTATCTAAATAGGAA  
GATTAATGGCCATAAGATTG  
AATTGGAGATCATAGCTGAAGTTGATCTCTATAAGTGTGAACCGTGGGACTTGCCAGGGAAATCATTGCTACCAGGGAAT  
GATATGGAGTGGTATTTCTT  
TAGCCCTCGTGATAGGAAGTACCCGAATGGATCTAGAACGAATCGTGCAACCAAATCTGGATATTGGAAGGCAACTGGGA  
AGGATCGAAAGGTGAATTCT  
CAAGCTCGAGCAGTAGGGTGAAGAAAACCTAGTTACTATCGAGGAAGAGCACCCCATGGCTCTCGTACAAATTGGGT  
TATGCATGAATATCGACTTG  
ATGAGAGGGAATGTGAAACCACTCCTAGTTTGCAGGATGCATATGCTCTTTGCCGTGTGATCAAGAAGAGTACAGTGATT  
GTGCCAAAAGTTGGAGGACA  
ATATGGTAATATTACAAGCGACCAATCACCAAGAGTTGAGCTATACTCTGAAAGAAGGGTGAAGATTTAGATAGTTCAA  
ATTATTTGATGCAAAATGAAG  
GATTGTTACCACACAATATGGTAAATGAGACTTCTCTCAATATCAATGGTACATCAAGGGATCATGAAAATTGGTTGCA  
ATTCTCATCTCAAGACCCAT  
TATTTAGTCTTCCAACTTCTTTCATTTCTAATTATGGAGCCATAACATACCCTCCATCCAAGGTGGATATTGCACTA  
GAGTGTGCAAGGATGCAACA  
TAGGTTTGCTATGCCTCCATTGGAGGTGGAGGAATTTCTCAAGTTGGAATACCTCACCAGACACAACAAGGAAGCAGAA  
CTAGAAATGATATCATGCAG  
GGAATTCTTCACTTACTCATGCTTCTCAGGGATTGATGAACCACTCCAGTTATTCACAAGCCTTGGATCACAATGACAA  
TTATGCTCCTTATGAAGATG  
ATTTTACTTTCATGGTTGGCACTAACTACAATCACATAAATGATATGAGCTCCATGGGATATGTTGACAAAACCTGGGAG  
GATTTGAACACAAGATCTAT  
AGAGATAGGTGATTTAGAGGATCAAGAGTCAAAGGCCAATAGGGTGGTAGAGAATTTGAGATGGATTGGAATGCCAAGAG  
AAGATTTTGAAAAGATGGAA  
GAACAAAATGTTGTCCCAATCGAGGATATTTTCATGCTACCAAACATTAAGGGAAACAATGGCATGCAAGAATATGAGCG  
GCACAATAACAACGTTGAAC  
AAAATGACAATGATGTGATGAATTTCTCATGGGGATTCATCAATGATGGTGACCCCAATGATAATTTTATAGAAGATGGT  
AACATGGACGGTTACTCAA  
TTCTCCAAGCTTTGAGATCATTGAGGAAACAAAGTTAGTCATAGAATGTTGGTTTCAACTCAACAAGTAGCCATGACAT  
TATTTACCAAAGTTGTTCTT  
TCACAAACACTCAAATTCAACTCAATCCAATGATGCCAAACAATCCAACTCTAAAGAGAATGTAGATGCAATTATGAT





TTTCTTCAGCCCTCGAGATAGAAAATACCCAAATGGATCAAGAACAAATCGTGCAACCAAATCTGGGTACTGGAAAGCCA  
CAGGGAAAGACCGTAAGGTG  
AATTCTCAGAATTGTGCAATAGGAATGAAGAAAACCCTAGTTTACTATCGAGGTAGGGCACCACATGGTTGTGCACAGG  
TTGGGTTATGCATGAGTACC  
GTCTTGATGAGACACAGTGTGAAACCAATACAGGCTTGCAAGGATGCATATGCTCTTTGTCGTGTGTTCAAGAAGACTGCA  
GTGATTCTCCAAAAGTTGG  
AGATCAACACTATGTTAATGTGAGCACCAGCCATGCAAATCAGATAATTGCAAGTGATCAATCATCAAGCATTAAACGAGC  
TATACTCTGAAGGTAGAGGT  
GAAGTTTTAGAGAGCTCAAATTATTTTATGTCAATGGATACATCCCCAAACATAAATGGAAGTCTTTCAATATCAATGG  
TGGAAGAAGGGATAATGAGA  
CAGCATGGTCACATTTCTTATCAGAAGACTTGCTCAATCTTCCAACAGCATCCACTTCTTCATTTCCAATTATGGATCC  
ATGAGCTATCCTCCATCAAA  
GGTGGATGTAGCACTGGAGTGTGCAAGGATGCAGCATAGGTTTAGCATGCCTCCATTGCAGATGCAGGACTTGACTTCC  
CTCAAGTTGGCATTTCCAAG  
CTGAAGATGGAACAAGGATCGAGTCCATGAGTGGAAAGCAGAAATGAAACAGATATCTTGCAGGAAATCTTTCAGTTGC  
TCATGCTTCGCAGGAGTTAA  
TAAATCAATCCAACACTACTCATCACAACCATTGATGAATGCCAATGAAAATTATGCTCCTCATGAAACTGACTTTACTTTT  
ATGGTTGGTACCAATTACAA  
TCATGTCAACGATATGAACACCATGAACATGGGATTTGTTGACAAAGCATGGGAAGACAAAAACACAAGTCAATTGAGA  
TTGGAGATCTTGATGATGGA  
TTCAAGACAGAGAGGATGATGGAGAATTTAAGATGGGTGGGAATGTCCAGCAAAAATGTGGAAAAGAGCTTTATGGAAGA  
GCAGCAAAAATATTGTTCCAA  
TTGATGATATCTCAAACCTCCAAACTAATACGGAAGAAAACGAACTGAAAGTAGGATTTGAGAAAACACAGTTGCAACAAA  
GAAATAACCGATACTGAGAT  
TGATGATTTTTCAATGGGATTCATGAATGATGAAGACCCCAATGAGAACTTCCTAAATGAGGAAAACATTGACTATTCAA  
ATTCTACAAACTATGATGTT  
GTTGAGGAAAACAAAACCAATCATGCGATGTTTGTCTCAACTCATCAAGTAGCTGATACATTCTTTCATCAAATAGCTCC  
TTCACAAACCGTCAAAGTTC  
AACTCAATCCAGTAATGGCTGCCAATCAATGTATAGAGAAAGCAACAGTCAAGAAAGGACCCTCTTCTTTAGAAAGTTT  
AAGGCCTGTGTGACAGGGAA  
GCTAATAAAGCCATCAAACACAGTAGCAAGTGTCTTGAATTCATCTTTCATTTTTGTTGATGCATTGTGTTTTTTTAA  
AGGGATTAGTGAAGATTGG  
AAACCAGACCTTAAACGTTGTGGCTGTGTTTACAGCATGAAGAATATGGGAGAAGCAACAGAGAGTGTGCCTAGGAATGA  
ACAAGAAAAGGTTTGGTTTG  
TTGGTATCAGATATGGGAAAGGATTTAGCATGGTCCTAAAGAAGATAAGCATTTCCTCACTATATCATTGGCTCTGTTC  
ACCATGTGGGCTAACCATAT  
CATAGTTGACTCTTAG

>Phvu1.007G085600

ATGGGTGAAGCTTCGGGAGATGGCAACGCTGACTGTTTCAGCCAGATGATGGCGTCGATGCCTGGTTTTTCGCTTCCATCC  
CACGGATGAAGAGTTGGTTA  
TGACTATCTGAAGCGGAAGATTTGTGGGAAGAGGCTGAAGCTCAACGTTATTCGTGAAACCGATGTGTATAGGTGGGAT  
CCTGAGGAGTTGCCAGGGCA  
ATCCATACTGAAAACCTGGAGATAGGCAATGGTTCTTTTTCTGTCCAGAGATAGGAAGTATCCTAACGGTGCAAGGTCTA

ATCGAGCCACCAGACATGGT  
TACTGGAAGGCCACAGGAAGGGATCGTAATGTGATATGCAATTCTAGGGCAGTTGGAGTGAAAAAACCTGGTTTTCTA  
TATAGGCAGAGCTCCTAGTG  
GCACGCGAACGGATTGGGTATGCATGAATACACCATGGACGAAGAGGAGCTTAAGAGATGCCAGGGTGTAAAGGAATAT  
TATGCACTTTATAAGGTTTT  
CAAGAAAAGTGGAGCTGGTCCTAAAAATGGTGAACAGTATGGTGCACCATTTAGTGAACAAGAGTGGGCAGCGGATGATG  
ACATAGTGGATTTTAATATT  
AAGATAACTGATCAGGAGGCTCCAAATGTTGTCTCTGAGAATGGGAATGTACTGCATCCGTTGCTTGATGATGAAATCAA  
CGACATCATTAGAGAAATTT  
TGGATGATGAGCTTGCCTTGATCAGCAGCATGTGAATGGTTTTCTTGACTTTCCTCAGGTTGTTACTGAAGAAACACAA  
AGTACTGTTGTCGATCAGTT  
CTCTGAGGCGGTTATGTTCCCTGAGACAATCAATCTTGCTGTGAATTTTTTGATGTGCAGCCAGCTTTGAGTTCAACC  
AGCCAGTACTTCTCATTTA  
CAAGTTTCTGAAGCTTCTGAGGTTTCTCTGCCTCCAACGTTAAAACAAAGGGGCTTGATTTGGATGAGGATGGCTTTTT  
GGAAATTAATGATCTCATTG  
ATACTGAACCTACATTGGCAAATGTGGAAAATCCCGTGGAGCACCTGCGGTTTGAAGATGGGTAAAGTGAACCTTGATCTA  
TACCAAGATGCAGAGATGTT  
TCTTCGTGACCTGGGGCAAATGAATATACAAATGCCCTTGTCAGCAACAATATCGAAAGTCAAACCTACCAGTTGCTAT  
GCAATCCAGAGGATGCCAAC  
CAAACCTGTTGGTGAATTCTGGATTCATGGTGAAGAAAACCCCTGAGTCCATCAGAAGAAGGCTTTGTTGATTCTTCTC  
GCTACCATCCGCAGGTGTTG  
TATGTGAATCTCTCAGTTTTCTGAGGAAGGCAATTACAATCAAAGTAGCACCGTGAAGACGTTTCTACAAGTAGCTTC  
TCCTCTTCTCTGGGCCTT  
TGTTGAGTCAATACCTACTACTCTGCATCAGCTGCTGAAAGTGCTTTGGTGAATCGAGCATTGAATCGAATGTCTAGCT  
TCAGCCGGGTAAGATCAGG  
CACACAAACATTGCTGCAGGTAAAGAACTGCAACTACGAAGAAAGCAGGCAGAAAGGGATTTTCATTCCTTTTCTCC  
TATTCTTATTGCTTTATGTG  
CTTTTTTGTGGGTTTTTGTGGAAGCTTGAGATTATTAGGGAGATGTATCTCTCCTTGA

>Phvu1. 007G140500

ATGGACCAATAGGTCCCGGCTTCCGATTCCACCCACTGACGAAGAGCTGGTTGTCTTCTACCTGAAGCGCAAGATCAC  
CGGAAACCTCTCCCGGTATG  
ACCACATCGCCGTGGTTGATGTCTACAAGCTCGAGCCTTGGGACCTTCCCCCTATGTCCAAGCTGAAGACCAAGGACTTG  
GAATGGTACTTCTTCAGCGT  
GCTGGACCGCAAGTACGGTAATGGCTCCAGGACCAACCGGCCACCGAGAAGGGCTACTGGAAGACCACCGGAAAGGACC  
GCCCCGTGGCCACGGCGAC  
CGCATCGTCGGATGAAGAAGACCCTCGTTTACCACATCGGTCGGGCCCCACACGGCCGTCGTACGAACCTGGGTCATGCA  
CGAGTACAAGATGCTCGATG  
AAGAATTGACGCGTGTGGCACAGTGTGGATGTGTATGTGGTATGTAGGATTTTCGAGAAGAGTGGTTCTGGACCGAAG  
AATGGGGCCAAGTATGGTGC  
TCCCTTGACGAGAAGGAGTGGGATGCGGAGGATGAGAATGAGCAGAAGAAGGTGGTTCCCTTGCCGGAGACTGCTCATC  
ATGTGGTGGCTCCGTTGACG  
GAGACCCCCATAACGTGGTTTTCTCCTCCTTTGCCGGTGGCAGCTGCTGTGGCTCCTCCCTTGTTGCTGATGATGAATT  
TTGGAATATTGGGCCTTTT

TGGAAACTAACGATCTTGACATGGAGCTTGATTTGACTGATATGATTGGAATGCTACTTTTCCATCTTCGAACTCCAT  
CACGGGGAGTGTAGTACCCA  
CGCTGAGAATTCCTCAAGAACTCATCAAGGATCAGGAGCCATTAGAAGGCACCTTTGGAATTTCTAGGCTGGAAAATGGCC  
AGCCTCTTGATATGGCTGAG  
CAACAAGACATGGGCACAAGTTCTGTGAGAGATGGAGACGATGGTGAGCTGAGCGAGATTGAGAATCTTCTCAATTTCAA  
TTATGCATCGGATAATATGG  
ATCTGGATCTATATTTTGTATGCCACCCAGGATCTTCCAGCGGCTGATGATGGATCATTCTTGAAACCAATGATCTTGCA  
ATTGGAATGAGGGTAATCC  
CACTGAGGCTGATCCTTCTGCGAACGATATGCTAGACGAGTATCTTGCACTCCCTGATGATGATATTTGCAATTATATAT  
CTTTTGTCTTCTCAGATT  
CCAGAGAGTGAAGAACTCTGATTCCAACCAAGGATCACCTTTAACCAGCAGACTCTGGAGGGAGAAACCGCTGATAAAGC  
TGTGGTTAGTAAACATGATT  
CTGATGCACAAACCAGCAAGGAGGCTTTCTCTGTGCAAAATAGAGAGGAGGAAAAGTTAGCACCAGAAAATTCAAACCCA  
TTCGTTAAGGAGGCTATGG  
ATGGTTAGCTAGCATACTGCTGCACCTGCACATGCTTTTGTAGTTCCAGCTAAGGATATTACGCTTGGGATTCATAGTG  
CAGCTCAGTCTTCCCACACA  
GCTCATATAACTACAGGTATGATCAGCATAACAGACATTACTTTTAGAGGCAATGCGATGGATTGGCCCATGGGAAAAAG  
CGGAGGGTTTAAACTGCAA  
TATCTACTGAGTTTTCTCAACCGGATGTTAATTGTGCTGCTTTGATACCTTTTCTGGCAAGACCGCATTGTGTTGTCA  
CATGGCTGGATTTTCTTGAC  
GGGTTTCTCAGTTCTTATTTCTTCACTTAGTTTCAAGATTGGAAGCATGATGTATACTGGTAAGTGA

>Phvu1. 008G189100

ATGGGTGCTGCTGTCGTAGAGTGTTACCCGCCGCCGCGCACGGCGGTGCTGTCTCTCAACACACTGCCGCTAGGCTCCG  
TTCCGTTCCACCGATGAAG  
AGCTTATTGATTAATCTGCGCTCGAAGATCAACGGAAACGGGGACGATGTTGGGTTATCCGTGAAATTGATGTCTGC  
AAATGGGAGCCTTGGGATTT  
GCCTGATTTGTCGGTGGTACGGAACAAGGATCCAGAGTGGTTCTTCTTCTGTCCGAGGATCGGAAGTATCCCAATGGGC  
ACAGGTTGAACCGAGCTACG  
AGCCTTGGGTATTGGAAGCAACGGGAAGGATCGAAGGATTAAGTCTGGGTCCACTTTGATTGGAATGAAGAAGACTCT  
TGTTTTCTATACTGGTCTGTG  
CACCGAAGGGGAAGAGAACCAATTGGGTTATGCATGAGTACAGGCCTACCCTGAAGGAGCTCGATGGTACCAATCCTGGA  
CAGAATCCGTATGTCTTTG  
TCGCTTATTTAAAAAACATGATGAGAGTCTTGAAGCTTCAAATGGTGAAGTGAACGGGCTGCTTCAACCCCTATGACTG  
CCAATCACTCTCCAGATGAA  
ATACAATCTGATTCCTCTCTGGATCCAGCATCTTCCCTCACAGATTACTGAAGGTGAAAAGCCTCTAACAGTTATCCCTGA  
GAACTCTGAAGAAGTAATAT  
CCAACATTATAACTCCAGTTGACTCCCATAGTGATGGATGTGATGCTCGGGATGCACAAAATCAGATTGTAGAAGTACTGCT  
TCAGAGCAGGATCAGGCATT  
TAACTTTGAGGATTTTTATGACCCAACAAAACCAGCAATTAGATGACAAAATTATTCTCCCCAGTCCATGCTCATTCCCAC  
CAGAAATTTACTATCAATCA  
GAACTTCAGTATGGTACAAATGACAATATGTCTGACCTTTTGTACTCAGTTAATTGGGATGCGATCTCCTATGATACTAG  
CAGTCTAGAGCCATGCTCAT  
CCCTCCTCAATGTTAAGGACCATGGATCAGGCAGTACTCAGATGTGAAAATGGCCAATATGACGAATCCGCAGGCATTG

CATGGTTATCCTAAGGAGGC  
AGTTGAGCAGAAGAGCAATGTAGGATTATTTGAGAACAGTCCCGAGATGGCTTCTCAAACGATGGTTCTATGGGCGAAG  
TGGACTATACGACCAAGAAT  
TGTGGGCAACTAAGAACTTTGATGCGTTTAATAATAATGGTGGTACTGGAATCAGAATAAGGTCTCGTCAAGGACGAAC  
TGAACAGCCAAACATGAATG  
GAATGGTACCATCACAAGGTAATGCACCAAGGAGAATACGGTTGCTTGTGGGCGTGGGCCTCCGTTTGGTTCTGAGGAG  
GCGGCAAAAGATGGAAGTTG  
TGCTTGTGCCCGAGAAGACCATAATTCAAAAACCATCAATACTAGGGAGTGGAAAGCTTCAGACAACCAAGCTGCCGACG  
AGAGTTCCGCCGTTGCTGAT  
GATGTGGATGAACGAGAGAAGGAATCTCCGGAGTCATCTGACTTAGGAAAGATCACTCAACAGCATGTTGCAACTGCAGA  
ATCCATCTCAAAAGACCATC  
TACAGGTTTCGTCTAACCGTGGCATGTGGTCTTATGTTCTTGGAGTTTCTGCAACTGTGTTGGTTTCAGTAATACTCGTT  
GTTAATATATGGGCATATGT  
GAGATCTTAA

>Phvu1. 008G241200

ATGGCACCTGTTTTGCCCTCCAGTTTTAGGTTCCACCCTACTGATGAAGAACTTGTGCTTATTACCTTAAAAGGAAGAT  
CAATGGCCGAAAGATTGAGT  
TGGAAATCATTCTGAAGTTGATCTCTACAAGTGTGAACCATGGGACTTACCGGGGAAATCATTGTTACCGGGAAAGGAT  
TTGGAGTGGTATTTCTTTAG  
TCCTCGTGATAGAAAATACCCAAATGGATCAAGAACAAACCGTGCAACAAAATCTGGGTATTGGAAGGCCACAGGGAAGG  
ATAGAAAAGTGAATTCGAAG  
GCTCGATCTGTGGGTATGAAGAAAACCCTAGTTTATTATCGAGGAAGAGCACCCCATGGCTCTCGCACAAACTGGGTAT  
GCATGAATATCGTCTCGATG  
AGAGAGAGTGCAGAACTGCTTCAGGCTTGCAGGATGCATATGCCCTTTGCCGTGTGTTGAAGAAGACTGCAGTGATTCCT  
CAAAAAGTTGAGGGGCATTA  
TGTTGAAGTCCCAATGTGAATCAGATTACAAGCGATCAATCATCAAGCATTGAACTATACTCTGAAGGAAGGGCGAAG  
ATTTAGATAGCTCTAATTAT  
TTTATGTCTGTGAATACTTGTTACCCCAATCTTGAATTGAGACTCCTCTCAATATCAGTGGTGAACCACCAGGGA  
TCATGAGAAATGGTCACACG  
TCTCATTACAAGATCCAATGTTTGTCTTCCAACCTCATATCCTCATTTTGGAGCGTACCTTCCATCCAAGGTGGATATA  
GCTCTAGAGTGTGCAAGAAT  
GCAACATAGGTTTGTATGCCACCTTTGGAGGTGGATGACTTCCCTCAAGTTGGAATCTCAGAGCTGAAAATGACACAAG  
CCTCTAGTTCCATGCAAGGA  
AGCAGACCTGAAACGGATATCTTGCAGGAAATCTTTCAGTGGCTCATGCCTCTCAGGAATTAATAAACCAATCCAGCTA  
TTCGAGGAATGGGGTGGCA  
ATGATTATTATATGCTCCTCGTGATGACGATTTTACCTTCATGGTTGGCACTAACTACAATCATTCAAATGAAATGAGC  
TCAGCGAGGTATGTTGACAA  
AGCATGGGAAGATGCAAACACAAGGACCATAGAGATCGGAGATATGGATCAAGAATTTAAGGCAGAGAGGATGGTAGAGA  
ATTTAAGATGGGTTGGAATG  
TCAAGAGAAGATTTAGAAAAGATGGAAGAACAAAATATTGTCCCAATAGAGGATATTTCAAGCCTCCAACTAACATGAA  
AGAAAATGAGGTGCAAGAAT  
ATGAGCAGCACAAATGGAACACAATGACACTGAAATCAATGATTTCTCATTGGGTTTCATCAATGATAGCGACCCTACC  
GAGAACTTCACAGAAGATGG

TAAACAGTGATGATTATTCAGGTTCTCCAAGTTTTGAGGTGGTTGAGGAAATAAAGGTCAATCGTGAATGTTTGTTCGA  
CTGGTCAAGTGCCGAGACA  
TTCTTTACCAAATGGTTCATCACAAACCGTCCAAGTTCAGCTTAATACAGTGATGGCACACGATCATTATGTAGAGAA  
TGCAGAAGCAATGCTGTTGA  
TAATGGAGGACCAGGGTCTTTAAGGAAGGTTAAGGCCTATGTGATGGGAAGCTACTGAAGCCATCAATGACAATAGCA  
AGTGCAGTTGTGTTTCGTCTT  
TGCATTGTGTGATGCATTATGCTTTTATAAAGGGAGAAGTGAAAATTTGGAATGAGACATGTTGCAGTAACAGTGGTA  
GCATCATGAAGAAAACGAGT  
CAATCATCTCAGATAATGAAATGGAATGAGCCAAATGAGGTTTGGTTTGTGGTATCAAAAGTGAGAAAGGATTAAGTGC  
AGTCTTGAAGAAAATAGGCA  
TTTTTCTACTATATCGTTTGTCTTTGTACCATGTGGGCTAACCACAATTGA

>Phvul. 009G039000

ATGACTTCCGTCGACTGTTATCCGTCGCGCGGGACGATGTCGCCCGCTCTCGCTGGATTCTCTACCGTTAGGGTCCG  
ATTCAGACCTACCGACGAGG  
AACTCATCGATTACTACCTGCGACAGAAGATTAACGGCAATGGTCCGAGGTTTGGGTTATCCGAGAAATGATGTCTGC  
AAATGGGAGCCGTGGGACAT  
GCCTGATTTGTCGGTGTACGGAACAAGGATCCGGAATGGTCTTCTTCTGTCCACAGGACAGAAAGTATCCGAATGGGC  
ATCGATTGAACAGGGCAACG  
ACTCATGGGTATTGGAAGGCAACTGGGAAGGATCGTAGAATTAAGTCTGGGATGATGTTGATTGGAATGAAGAAGACTTT  
GGTGTCTACTGGTCTGTG  
CACCCAAAGGGAAGAGGACTAATTGGGTTATGCACGAATATCGCCCCACCTTGAAGGAGCTTGATGGCACCAATCCTGGA  
CAGAATGCATATGTCCTTG  
TCGCTTGTTTAAAGAAACACGACGAGAGCCTTGAAGTTTCGCACTGTGATGAGGCAGAACAGACTGCTTCAACTCCGATTG  
CTGCCAATTACTCTACGGAG  
GAAATACAGTCTGGTCTGGTCTGTTGTTGCAGTGTCCCATCACTTGTTACAGAGGATGATAAGCACCAGGCAATTATCCC  
TACGCACTCTGAGGAAGCAA  
TATCCAACGTATAACTCCTGTTGATTGTCATAGTGATGGATATGATATTTCTGATGCACAAAATAATTATGTGGCACCA  
GCGGCAGAGGAGTTTCAGCC  
GTGGAACGTTGATATGTGTTACGATCCAAAAACGAGCTATTGTATGACAGATTATTTCCCCTGTACTIONTCAACTCAAC  
CAGAATTTCCCTTATCAATCA  
AACAGTGAATCAGATAGTCGGTATGGGCTTCAATATGGCACCAATGAGACAAACATTTAGACTTTTTGAATTCTGTTGT  
TAACTGGGACGAACTACCCT  
ACGAGGAGCCCAATTGTCAACAGTGGAGCTCCCCCTCGTTAATGTTTCAAGATAGTGTTTTAGGCAGCCACATAGATTCT  
GAACTTGCCAAATATGACATA  
TATGCAAGCTGGTTACGCTGAGGAGGCAAACGACAGAAAGATTCCCTTTGGTATAGCTCCAGAATTTGACAGCACCCTG  
GCATCCCCATTGACCGTGGT  
GGTGGTATGAGCAGAAGAGCAATGTTGAGTTATTTCAAACAATCCCAGAGAGCTTTTACTGATTATCAGCAATGTAG  
TATCTTTAATGCAGTTCCCTT  
GTGGGATACTGGAATCATTAGGAAGACACGAGTGGTTCAAAATGAAAAGCTAAGTGCAAACGTTACACAAGGTACAGCG  
CAGAGGAGAATTCGTTTGGT  
GCAGAAGACCGGAAATGAACTCTCAAATAAGATGGTAAAAATGAGCTTGACTCAAAATCAATCATTGCAGTGGAGGAGA  
AAGCTTCAGAAAACCATGCT  
TCGGATGAAAGTGCTACTCTACTAATGATGGGAATGAACTGCAGAAGACACCTGAACCAATGGCAATAGAAAGATTTG  
TCGACAAGTTGCCAAAGCAA

GTTCCACCTTGGGGTTAAAGGATTTTTATTGCTCAGAAGGGTGCCATACATTTCAAAGGCTACCTCCAATCGTGCCAAG  
TGCTCTTCTATTTTTGTAGT  
TTCTGCCTTCTAATGGTCTCATTAGTGGTCTTTACTGACATCTGCGGATATCTTAAATTCTAA

>Phvu1. 010G120600

ATGGAGATTGTAGGATTCGGTTTTTCGTCACAGAAAGAAGAACTGTGGACTATTACCTCAAACATAGGTTGCTCGGTGA  
TGATCCACATGTCCACGTCA  
TCCCTGACATTGACCTTTGTGAGGTGGAACCTTGGAACTACCAATGTTATTAGCACAATCAGCTGTACAATTCGATCTT  
CCAGAATGGTTTTTCTTCAG  
TCCTGTTGATTTCAAGTATTCAAATAGTAAAAGGGTTAACAGAACCAAGTGTGGCTTCTGGAAACCTACTGGAAAAG  
ATCGTGAGATCAGGAGTTTG  
GACACAGACTCTCATTGCCACAAAGAAGACTCTGTTTACTATAAAGGCCGTGTTTCCCGCGGTGTCAAGTCCAAGT  
GATTATTCATGAATACCATG  
CTGTTACCTTTACGAAAGCCAGAGGACTTCTGTTTATGTGCCTGATGAAGAAACCTGGACCAACAAGTGAAGGTGAA  
GGTGATACACAGACTAGCGA  
TGAAGGGGAGAGCAGTAGAGTCATGGTTTCTGGCTATGAAAATGAGGCAATAGAAAGGGGGATTCTTCAAGAGGACTT  
CTGCTGGAATAGAGACGACC  
TTTACGCTATGCATCAAACATATAATTAATCTCCCCCACTGCAACAGTCTCCAATTGGCATTGACCAAGAGGAATCTT  
TCTTCCACACTCCCATTTT  
ACAGTTCCCATTTTAGAAATGAATCCAACAATATGCAGATTCCATTTGAAACTACCCAGGAGGAGGCAATTCCTGAGT  
TCTATTTGGGTTGATGAGAG  
AGAACTTGGATACCAGATGCCATCAATCTTCTGA

>Phvu1. 010G121100

ATGGAGGACATAATTTCCATTCTTGATCACTTGCCTGTAGGATTCAGATTCCGTCACAGATGAGGAGCTTGTCAATCA  
TTACCTCAAACACAAGTTGC  
TGGGTGATGATTTCTCTGTTCAGTTTCCAGAGATCGACCTCTGCAAAGTGGAACTTGGGACGTGCCAGCAAAATCA  
ATATTCAAATCCGATGAGCT  
GCAATGGTTTTTCTTCAGTTCTGTGGATTACAAGTACTCCAATAGTAAAAGGGTCAACAGGACAACCGAGCATGGCTTCT  
GGAAATCCACTGGAAATGAC  
CGTAACATTAAGACTGGTGGCAGTAAAAATGTTATTGGGACAAAGAAGACTCTGTTTTCCACAAAGGCCGTGTTCTGG  
TGGTCAAAGGACCAACTGGG  
TTATTATGAATATCATGCTCTTGCCTCCCGTGAAAGCCAGAAGACTTACGTTTTATGCCGCTTGATGAAGAAATTTGAG  
AATAAAAAATGAAGGGAGAAT  
TGATGCACCAAATTTAGTGGAGGCGAGCCAGCACAAGCATGGTTTCTGACTATGGAAATCAGGCAGATATTTTACCTA  
GAATGATTGTGGATCCAATC  
TTTCCAGAAGAGATTTTCTTCTCCCAGTACAACAGCCTCCAGTTGGTATTGAAGTGAAGGATTTTTCCCAAATCCCC  
AACGCGCAATGCTTGTTTTG  
GAAATGAAAGCATCAATATGCAAATCCATTTGGAGTTACTGATGATGAAGATGAGTTCCTAAATTCAACTGGTTGAT  
AATGAGGAGTTTGTATCAA  
TGAAGAAAGAAGAGACTGTTTTGTCAATCGTTCCACCAACCAAAAGTCAATTGAGAAGAGTATACTATGCAAGCAGTGACA  
CAGATGCTGAAGTTGTCTCT  
AATCTGCATGGTAACATTTGTTCTGGTGAATTTCTGTTCTGGTGGCATGAGTAGTCTAGCTTCAAATCATGAAGCACA  
CAAAGAAAAAAGGAGAGTA

TCATTCAAGATGATTTCTGGGCAGTGGAGACATCCTCTTGTGACTCAACTGCAGATGAACCTGTCGAAACAACAAGATTG  
GAAAATCGTTATAATCTAAG  
ACCAGACAACCTCATATTACAAAAACTGTTGCAGGAAGACCTCAAAACACAGAAGAAGGTTTCAAACAATGCAGTATCCC  
ACATAGAGGCTCGGAAGGAA  
TTGGTCACTGTGAAATCAGAGAAAGATCAGAAAAGTACTCAAATACTAGTTCAAGAGGGATCCTCAAGATCAGAAGCCA  
TCAATCATCTAATGTCAATA  
GCAAAAGTTCTTTCTTTTACATGGAAACGACTTCATCAAACAAAAACCTGTTTCCACGTTTCAGTATATCTTGTCAATGTT  
GTCATAGGGATTCTGTTGTT  
AATAGTCATTAGTTGGGACGTATTATTATGTTAG

>Seita. 1G371600

ATGAGCAGCCTATCACCTCTCGACTCCTCGCCGGCGCCGAGGTGCCCTCGCCCCGGCTCCGCTTCCACCCACCGA  
CGAGGAGCTCGTCTCCTACT  
ACCTCCGCCCGCGTCTCGGCCCGCCCTCCGCGTCGACGCCATCGCCGAGGTGATCTTACCCTCGAGCCCTGG  
GACCTCCCCTCCCTCTCCCG  
CATCCGACCCGCGACGCCAGTGGTACTTCTTCGCCACCTCGACCGCAAGATCGCCGGGGCCGGCCGGCGGCCGGG  
GAGGCCCGGCAACAGGACC  
AACCGGCCACGCCGGGGCTACTGGAAGACCACCGCAAGGACCGTGAGGTCTACCACCGCGCAAGGCCGTCCGGAT  
GAAGAAGACGCTCGTCTTCC  
ACGCCGGCAGGGCGCCCAAGGGGAGAGGAGCAACTGGGTCATGCACGAGTACCGACTCCTCGATGCGGACGGGCCCCAG  
GATCTGCACGTGGTGTGTAG  
AATCTTCCAGAAGCATGGTCTTGACCACAGAATGGAGCGCAGTATGGTGCACCATAACATGGAAGAGGAATGGGAAGAAG  
AAGAAGATGCCATCGAGAAT  
GCACCTGTTAGTGGCGCATCTGCTGGAATGGCTGCAATCACATGTGCTGTAGATGAGGAGTGAATGAGGAGGATGAGAA  
TGGATACTGTAAAATCAATG  
AGCTTGCTCAAGCCATGAAGACTCACCAGAGATGGCTCCTCTACAAGCTCAAGGTTCCAAAGACACCAGTGACGGAAGC  
TGTGCTGATGGTGTATTTC  
TCTGAGGAGATTTTACAGGAACCTTTATCAAATATTAATGCAGAGAATATAGGTAGCTCTGAAGGGCAGAATGCCACTG  
ATGATAACTTCAGTGTGAT  
GACTTATTATCCACATGCCCCAAAAAGATGATGGCTATGTAGGTCAGGATGGCACTCTGAATGGTAGTTACCCGGAGGA  
TGGCAATCACACAAATTGGC  
CTTTGAGAGCATATAGTAATCAGAACTATGCCAATGGTACTCTTAGTGCTGAGGAGTTCTTTGACACACAGAATGATACC  
AATGGGAATGCATATTCAGA  
GTACCCGCAGGCTGATGGCTTTCAGTACCTCACCAACAAGTGGATGGCAGCATGGTATTTACGATGCTCCGTCTGATT  
ACAACCTGGTGGATGGAAAC  
GATGACTTTGTATATTTGAACGACCTCCTCAATGAGCCGCTTGGAAATGAATCACTCTTTGACGGAGATGATATGATGGC  
TTACTTTGATGCCACGGAGA  
ATGATTTCAAGTATGATATTTCCGGTTCTGCCAAGAGTTCAAACCTATCAATTTGCAGAGATGTCAACGAACCTTTGCCCAA  
AAGGGTGATAACAAGGTCGG  
ATTTACATTCGATGGGATCGCCAAGGCTTCGGAAGCAAATGTTCAATACAGTGGCTCTTCATCTGGTTCCCATGAGGATC  
TGATCCAGATTCTGCAGTA  
CCAGATGACGACACTGGTGATAAACTTTTGGAAAGCGCTTGGCCGCATGTTGGGCTCTATCCAGCTCCACCTGCAAT  
GGCCTCAGAATTCCTCCGG  
CGACCGGAAAACTGTTGGCGTGCTCTCGGCTGTCAGCCCGAGCTCGATTTCGTGTTACGGCTGGCATCATCCAACCTGAT



GGCCTCAGTTTTACTGGCGC  
CTCCGAGCGGTGGCCCTGCAGAAGAATGGAGACTTCAGTTTGCTTCTGTCCCTCACAGTGGAGAGCGACATGTCAACCA  
AAGCTGCTGTTTTCGAGCAG  
GCTTCACGGATGAGCACCATCCCAATGGTGCTGCGCAGCGGCATGTATCTTTCTTTGTCTCGGCCATGATACTTGTGTT  
GAGCTACAAAATAGGGTCGT  
GTATCTACAGCAGGTAA

>Seita. 2G258300

ATGGAACCCCGCCGCGCGGGTGGCCGCGGGCTTCCGCTTCAGCCCCACCGACGAGGAGCTCGTCCTTACTTCTCT  
CAAGCGCCGGATCGTCTCTG  
CCCGGCCCTCACCTACGTCGCCGACGTGACGTCTACAAGTCCCACCCTCCCACCTCCCAGAGAGGTGCGCGCTGCAG  
ACGGGGGACAGGCAGTGGTT  
CTTCTTCAGCCGGACGGACCCGAAGTACCCCAACGGCTCGCGCGCCAGCCGACCACGGGGCAGCGCTACTGGAAGGCCA  
CGGGGAAGGATCGTTCATC  
TGCGGGGGCGCCGGCGGTGGGAACAAGAAGACGCTCGTGTACCACCACGGCCGGGCCCCGCGGGGAGCGCACGGA  
CTGGGTCATGCACGAGTACA  
CCCTGCTCGCCGACGCGCTCCCGCCGGCCGCGCAGGGGAGGGAGTCTACGCGCTGTACAAGCTTTCCAGAAGAGCGGG  
GCCGGGCCCAAGAACGGCGA  
GCAGTACGGCGGCCCTTTCGGGAGGAGATTGGTTGGATGACGATGAGGAGGGAGTACTGCAGATGCTCCGCTAATT  
CTGTTCTATTGCCCCTGCT  
ACAGTGGAGGAGCATGCAATTGCTGACCGTGAACCTCCGATTGAGGATCTTCACGAGCTCCTGTCACAAATTGGAATGA  
TCAGGAGGAGTTTGGTGAAG  
CACCGCTAGATTTCTCAACACCTGCTACTTCCCACGGTCAAGGTCAGGGTTGGCCCAGTGGTGGGGGTGACAAGGCTGAG  
GTTGTGGATGCTTCCGTTAG  
TGATGGTGCTGTGGTAGTGCCAGAGAATACGTGCATTGATCTCCCTCTTGGGGATATTGAGCAGCTTCTGATGCAGATAT  
CTGATGATCAGCAAAATGCC  
GAATTTTTCTCAGATTTACACCATCAGTTCACAACCTGCAGCTTCAGTGTGACAATCATCAGGTTTGGCTTGATGCCCA  
CAGGGGCAGGAAGTTTGTG  
CTGCAGATCCTACCGCCAGCGGTGGTGGCTGGTAGCAGCAGAATGTACTGACACAGATCTTGAAGTCTTCTGTGCAA  
ATAGCCAGTGACCAGGACAT  
GGTTGAACCTCTATCAGATCTGTCCCCACCAATTCCACATCATAACTTCAATCAGGTCGGCATTGGGGATTTCCATGAAT  
CTCACGGTGCTCCGGTTGGT  
AATCTTTCTGTACAGTTCAAGAAAGTACATTTGTTCCACAACCTGAGCTGAGAAGTCAATTTCCACAGTCTAACCTAAC  
CAATGTGCCATTTAGCGGAG  
AAACAAATTCTTCTGAAGGGACAAGTGTGCCACATTCTGTGTCAGGTTTGTATCAGTTACAATAGTCAGGATGCTGATGAT  
GAGTTCCTTGAATCAATGA  
TTTCTTTGATCTGAGGATGTAGAACAGAGTGCAAATTGTACAGCAACGGAGCACTTGATATCTGCAACAAATGGGATGT  
TTGACAACCTTGAATACTCT  
GATGCTCCTACGTTTCTACCTGGTCCATTTGACACAGCTGGAGAAGTAGCTGAAAATCAATTTTTTGTATTTGGTAGCAG  
TGGAATTCAGAACCAGGGAT  
TTCATTATACAACTCAAGTAAGGACACAAAATCAGGCCGCTCTTAATGTGCGGAGCCATATGAAGGATAACCATGTTGTC  
TTATCCTCACATACATCAGG  
CACTTTGAATCTTCATGCGGCAATGAGCCACCAAGCAGGAGCTCAACTGCTTCACAATCATGGTTCAATGCTGCTCTAT  
CAACCTTGTGGACTCTGTA

CCTAGCAGTCCAGCATTGGCTGCTGAAATCGAAAACACTGTTATCAACAGAACAACCTTCAGCGCATCTCTAGCTTCAGATC  
ACATCAAGCTTCAGGTGAAG  
AAAAACTGTTATCAACAGAACAACCTTCAGCGCATCTCTAGCTTCAGGTCTCAGCAAGCCGTACGTGAAGAACCAGCACC  
CGAAGGATTACAGTTACCAG  
AGGTGCGAGACTGACGTTATCTCTCTACTGTTATACTAGCTGCCGTAATGTGGACCTTACTGCTGGGTCTGCACTCA  
ATTTTTCGAAGGGTTATGG  
AAATCATCTTCTAGGTGA

>Seita. 6G055400

ATGACGGTGATGGAGCTCAAGGCGCTGCCGCTCGGCTTCCGCTTCCACCCACCGAGGAGCTCGTCCGCCACTACCT  
CAAGGGAAAGATCACCGGCC  
AGATCAACTCCGAGGTCGAGGTCATCCCCGAGATCGACGTCTGCAAGTGCAGCCATGGGACCTCCAGATAAAATCGCTG  
ATCCGGTCAGATGATCCTGA  
ATGGTTCTTCTTCGCGCCCAAGGACCGCAAGTACCCGAACGGGAGCAGGTGCAACAGGGCCACGGAGGCTGGCTACTGGA  
AGGCCACTGGCAAGGACAGG  
ATCATCAAGTCCAAGGGTGACAAGCGCAAGCAGCATGTCATCGGCATGAAGAAGACCCTTGTGTTCCACCGTGGACGCGC  
ACCAAGGGCGAGCGGACAG  
GGTGATCATGCATGAGTACCGCACCCTGAGCCGGAGTTCGACTCCGGTGAGCAGGGTGGTTATGTTCTTTATCGCCTC  
TTCCGGAAGCAAGAGGAGAA  
ACCTGAGCGCGCTAGCCCAGAGGAAGTGGATAGGAGTGGCTACTCGCCTACTCCTTCTCGCTCGTCACCTGACAACATAG  
AGGCAAATGAGGAAGCAAAC  
ACGCCGTTAAATAGGGAATCTCCAGAATCTGGTCTGCATGAAAGTCCAATTGAGCTGCCAATCCTGTTGAAACTCATGC  
TATGCCAATAACAAGGTGGC  
TGCGGGCAGAAATGATAACTTAGTGCCTACTGCAGCGGATGTTCCCATATGCCTTTCAATGGACATGCTGATGTACCT  
GAGGTCAATCCTTCTGCTGG  
TGCTTCAGCTCAGCTCATTAATCCACAGAATGGGAATGATAATCTCACCAATTTGCGCCTGATATTGCCCCAATCTAC  
AGCATGGAAATGCATTCGTC  
CCTGATCTCCAGGAAATAGCTTTTTGGTTTTGATGGCAACATGAATCCTCCTGATGCCTGGATGTTTTCTTGAACCAAGC  
ACTTGTGATCCTGATGAAC  
ATTCATCAACAACATCAAGAGTTTCAGTATGATTCAGACATTCCTACAGAATTTGAGAACAATGGGGTTGCACAGGGTGAA  
GATGATCAAAGCTGGTGGGC  
AAATCTAGATTTCTTGTGATGAGCCGAACCCTCTGAATTCAGCATATGAGAATACACCGTTGCTGCCTTATGACGCCA  
ATGACCAGGATGACTTTCA  
GTGGACTCTGGCGCTGATTCCTTGCATGAACTTTTCAATAACATGGAAGATTCAAATGCAAGGAGGGCTGGAATGAACAT  
TGAATATGGCCTTCAGGGAA  
CTGGGATTTCTTATGCCCCGGCAGTTACAGTCTCTGCGCAGCCAAACTATGTGCTTACTAACCAGGGCACTGCATCA  
AGGAGGCTCCGGCTACATTT  
GCCTGCTGATTTGAGAGTGCAGGAGCATAACTAGAGATGAGAGTGAAGATGAAGTGTGATGTTGTAACCTGCAGACA  
GGGATGTGGTTTCTGATGGA  
GATGAGGCTGAGTCAACAGGGATTGTTATTAGAAGCCGCCCTGCTCCAAGTTCAAGCTCGGAGAGTTCATTACCCAACA  
GGGGACTACAGTGCAGAGG  
TACGGCTGCAGTACAGCCTCAAGACAGGACCATGTCCTAGTACTGATGATACTTCGAGCTGCATCATAAACGAAACAGAA  
AGTACCACCAACCAGAGAA  
ATCTGAGATTGCAGAGGATGCAAGTAAAACTTTGCTGGAAGTGTGATGATCTGTCAGTCAATTGCGATGATAATGAGC

AAAAGACCATGCCTCAACAT  
GTTGCTGAAATGGCTGTTCCAGAAGCCAAACCTGTTCCAAGGCTGCGGAAGGCTTCTGAGAAGAGTGACAAGGATACTAT  
AAAGCAGGAGAGTGGTCTTG  
AGTCGCTGGTGAGAGCACCAGTGCAGAAGGGAGGCTTCCAATCATACACCGCCTGGCTGGTTCTTTCCGGTGGTTCTGCTA  
CTGCTTCTCTCTGTTGGGGT  
ATATGGGTGGATGTGA

>Seita. 6G251900

ATGACCCACCCCTCCTCGTCTCCTCGTCCGCTCCGCCGCCGCCGCCGGCGCGGGGAGGCCACCTCCCTCGCGCCGGG  
CTTCCGCTTCCACCCACGG  
ACGAGGAGCTCGTCTCCTACTACCTCAAGCGCAAGGTCTCGGCCGCCGCTCAAGGTCGACGCCATCGCCGAGGTGAC  
CTCTACAAGCTCGAGCCCTG  
GGACCTACCCTCCCGCTCCCGCTCCCGCTCCCGGACTCCAGTGGTACTTCTTCAGCCGCTCGACCGCAAGCAGCCCA  
ACCGCGCCCGACCAACCGC  
GCCACGTCGGGGGATACTGGAAGACCACCGGAAGGACAGGGAGGTGCGCCATGGACCCAGGATCGTGGGGATGAAGAA  
GACGCTCGTCTTCCACGCCG  
GCCGCGGCCCAAGGGCGAGCGCACCAACTGGGTATGCACGAGTACCGCCTCGAGGGCGACGAGGCCGCGGGGATCCCG  
CAGGACTCGTTTGTGGTGTG  
CCGATCTTCCAGAAAGCTGGCCCAGGGCCGAGAACGGGGCACAGTATGGTGCACCCTTCGTCGAGGAGGAATGGGAGG  
AGGATGACGAAGATGTCCGGT  
TTGCTTCCGGTGGAGGGTATGCTGTTGTTGACCATGAGGTTCCCCAGGTCCTAAGGAGATCCCTGGCGCTTTGGAGAA  
AGGCTATCTCAAATGAGCG  
ATCTCATCCAGGGTTTGGGTGATCAAAATGGGAATGGTACAATTGGTTTGCCAATTTCTGATACCTCAAATAATAGCAAT  
CATTCTGAAGATGTGGATGG  
AAATTCTGGGGACATTTTAAAGTATCCGAATCTTGGCTCTAATTTTCTTCAGTATGTTGAGCCTGGGGAGCAGAATAGCT  
TAATGCTTAGTGATAATATG  
ATATCAAACGCCAATGCTGGAGATTTTTTTAATAATTCCAGCCCCAGTATGGGTTCTTGAGCTGAAGGATTTTGCAGA  
TGCTGCAAATCTTGATTACC  
CATTAGGCAATGAGTCCACTGTCTGGCCTTCCAGATGGTTGGGCATGGAAAACACCCAATTCTTTGGAAGCTGTAAATGGA  
GCTAACAATGATATTCTCC  
ACTCCCTGATGACCAGACCTTCCAGCCTGATGAGCTGGAGCAGTTGTTGAGTCAATACAAGAAGATTTCCATTTTGGCT  
CAAGTATCATTGACCCCTCG  
CATTCTTCTATAACAAATTCAGTTATGCCAGAGGATGATTCTTTGATGTTCTATGATGCACCCTTTGATTCCACCATCTG  
TGATGATGGGTTTAGACAGG  
TGAATGGAATCTTAGCTCCCCGGCTACCAACCTATCTGGTATTGGCATGGTGGATGATGGTATGCCATATTATGATGCA  
ACGGATGATAATTTATTCAA  
TGATATTCTGGGCTCCATACAGCAGCCAGCTGGTAGTTCGCATGCTTTCAATGGCCAGTCCCTACCCAAGAGGTCAACA  
ATACCATGTATACATATAGT  
CCGACTCAAAGGTTTTAGAACCTAATTTTGTAGTTGGTGCCCCATCATCTGCTAGGTTACCTGAAGCTGGTAGTCAGTT  
AAATTGTGTTGTTTACCAG  
ATGGGCAGGCTAAGAGTAGTACGTACGAAAGGGCTTTGTAAAGATTTTGGATTGATCTCTGCTCCCCAGCTTTTGA  
CTGGAGCCGGCTAACCTCTG  
CAAACTCTGGCTCCTATTTCTGGAGCAGCCCCAACACCATCCATGTCTCTGCTGAAGTATCAGTATAGGTAGTTTAG  
CTGTTGCTTCTGGCCAGAT

AAGTGGGCCAGCAAAGGATCAAGGCATGGAGCTGCTCTTACAGATTTTGAGCCTGGTACCCGTGTACTGCGGCTG  
CAACCCGATTACCACGGTGC  
TGCCTGGTGGCTTCTGCCTTGTCTCTTTTCGGCAATAATGCTCTTGGTGGCTATGAGGTGGTATGTGTATCTATGGC  
AAGTAG

>Seita. 4G000700

ATGGCAGCTGCACAAGCACAGCGCAGGCGCAGCGCCGCGGGAAAGGAAAGCGATGCCGTCTCCTCCTCCTCCGCCGCC  
GCCGCCCGGGCTCTGCCGG  
TGGGCTTCCGCTTCCGCCGACGGACGAGGAGCTGGTGTGCCACTACCTCAAGCCCAAGATCGCCGGCCGCTGCACCCG  
GACCTGCTCCTCATCCCCGA  
CGTCGACCTTCCGCATGCGAGCCCTGGGAGCTGCCCGCAAGGCGCTCATCAGGTCCGACGACCCCGAGTGGTTCTTCT  
TCGCGCCCCTCGATCGCAAG  
TACCCCGGGCGCCACCGCTCCAACCGCTCCACCGCCGCGGCTACTGGAAGGCCACGGGCAAGGACCGCCTCATCCGCTC  
GCGCCAGCAGGCACCCTCA  
TCGGCATCAAGAAGACGCTCGTCTTCCACAGAGGCAGGGCGCCGCGAGGCCACCGCACCTCCTGGATCATGCACGAGTAC  
CGCACGGCCGAGCCCCAGCT  
CCAGCAAGGCCAAAACGGTAGCTTCGTTCTTACCCTGTTGACAAGCACGAGGAGGAGGAACCGGAAGCCGAGACG  
CCGCCGATTACCGTCCACA  
TCGTCTGCCCGCACCCTCCACCCATCGCGCCAGCAGTGAAAGCTGAGAATTTGTGCCAACCCGCTTCTGCGAAAATGGC  
TCATCTTCTTACAACCTCTCA  
GTAACAATGAGCCAACAGCCGCCAGGAAGGCGATCCTCTTCTGGATGTGTTAGCCAGCTTCCAGACCTACAGCCTGAG  
CAAACATACGATGGATTCCC  
TACCATCACCTCTCCGATGCGTCTTACACTGACCATCCTTTTCTTGGAATGTTGGTGGGCAAGATCTTTCGGCGTATA  
TAGATAGCATCATTGCTCAT  
CAGGATCTGGAAGACTTGTGGTCAACCCCTTCTTGGCGAAGACGGTGGAGCACCCACTGGAAATTTGAGCCATTCC  
TACTTCTTACTTGTCCAA  
GCAGCAGCTCTCAAACAACAACAGATCACCTGAAAATAGCTGGGCAAACCTTGATACAGAAAAGTTGCTCCTAATCCAG  
GGTGCAGATGGCACAGATGC  
TGCTGCTTGCTGTTCTTCTGCAACAAAATACTACAATTTGATACAGGTGATGCTAATCATGACACGGGACCTCAAACCTG  
ACTCGGCCTCTGGTGTGTCA  
GCTGAAGCATCCACTTATACAACCAATATCAACTCAATCTGCATCCATTCTCAAATGGAGCTGGCCAGGAGTGACAT  
GACAGATTCAGACGCCTTA  
ATGGGCTTGAAGGTTCCGGCACCAGAACCTTTGATGCAGCAATTATCAGTTTCAAACCTTACGGATCCACACCAAGGGACT  
GCGTTAAGAAGGATCCGCCT  
TGTGCACTCTATTAGAGGGCGTCAGTCACTGAGCCTGTACTAACTTCAAATTCGGAGGGTGAAGATGAAGAACGGTCAT  
GTTATAGCACAGACAATTCA  
TCAACCAACAACGAGGATTATGCCAATGCTGGAGGACAATGCATAGTCAAGGTGGAGGGTGATACCTACTCAAGTAGT  
TTCTTCGACGGAAGTTACAG  
GAGAGCTACAGGATTTATATTTGATGAAGGTGCATCGTCGCTCCATGGTGTGGTGCATGGAGGCAATCTCAAGCGG  
AGGCTCAAAGAGGAATATAT  
GGAAACCAATCAGGATGCCGGTGAGATCCTGCAGCAGAGCATCCGTGTACCTAGAGAGCCATCCCTGAGGAGACGACAAC  
GGATCAGTTCAGTTGTGCGG  
GTGCTTTCCTGGCTCTGGTGGTCATTCTCGTATTTGTTGGCCTATGGAAATGTATCTAG

>At4g29230

ATGAACAAGAGTAATCCTGCTGGTTCGGTGACTGGTTCGGATATAATAGACGCCAAGATCGAAGAACATCAACTTTGTGG  
ATCCAAGAAGTGTCTAGCTGCGGCCACAAGCTCGAAGGCAAACCACAGGATTGGGTTGGTTACCAGCAGGAGTGAAAT  
TTGACCCAACGGATCAAGAAATTGATAGAACATTTAGAAGCGAAAGTGTTAGCTAAAGACTTCAAATCTCACCTCTCATT  
GACGAATTCATCCCAACCATGAAGGCGAAGACGGCATTGCTACACTCATCCCGAGAAACTTCTGGAGTGACTAGAGA  
TGGTTTAAGCCGACACTTCTTTATAGACCATCAAAGGCGTACACGACGGGAACAAGAAAGCGAAGAAAGATTCAAACAG  
AATGTGACAATAATTTGCAAGGAAGTAGTAGCTCCGGTGAGACGAGGTGGCATAAGACCGTAAGACAAGACCGGTTATG  
GTAAACGGTAAGCAAAAAGGTTGTAAGAAGATTTTGGTTTTGTATACCAATTTGGTAAGAATCGAAAACCGGAGAAAAC  
CAATTGGGTAATGCATCAATATCATTTGGGGACACATGAGGAAGAGAAAAGGAGAAGCTTGTGTGTCTAAGATCTTTT  
ATCAAATCAGCCTAGGCAATGCAACTGGTCGTCTTCTACATCGAGCTTGAACGCTATAGGTGGTGGCGCGGTGAAGCG  
AGTAGCGGCGGAGGCGGCGGAGAGTATCATATGAGGAGAGATAGTGGGACTACTAGTGGTGGGAGTTGTTCTTCGTCTAG  
AGAAATTATTAATGTTAATCCTCCGAATCGATCCGATGAAATAGCGGCGTTGGTGGTGGCGTTATGGCCGTAGCAGCTG  
CGCTGCGGCGGTTGAGCTGGGCTCCGAGTTATGCAATGGATCAGCTCAGCTTTGTTCCGTTTATGAAAAGCTTTGAT  
GAGGTGGCGAGGAGGAAACTCCTCAGACTGGGCACGCTACATGTGAGGATGTAATGGCAGAAACAATCGTCATCGTCA  
TCAACCATCATCAACATCACATCATATGGCTCATGATCATCACCATCATCATCAACAACAACAACACGGCATC  
ATGCATTCAACATAAGCCAGCCTACACATCCGATATCAACCATTATTTCTCCATCTACTTCGCTTCACCATGCCTCCATT  
AATATTCTTGACGATAATCCTTATCATGTTTATAGAAATCTTGCTCCCAATGAAAATTACCAGACACAACAGCAACTACG  
TCAAGAAGGAGAAGAAGAACATAATGATGGGAAGATGGGAGGAAGGTCAGCTCCGATTGGAAGAAGCTATAATGGGCT  
GCACTTCTTACCCTCATCATGATGTAAGATGGGTCATCATCAATGGGGAACCAACAAGAAGCAGAATGGTTGAAG  
TACTCAACGTTTTGGCCAGCCCCTGACTCTTCTGACAACCAAGATCATCATGGGTAA

>Glyma. 20G172100. 4

ATGATGTCGTCGATGCCGGGTTTTCGCTTCCATCCCACGGATGAGGAGTTGGTGATGTACTATCTGAAGCGGAAGATTTG  
TGGGAAGAGGCTGAAGCTCGACGTGATTCATGAAACCGATGTGTATAAGTGGGATCCCAGGATTTGCCTGGCAATCCA  
TATTGAAAACGGGAGATAGGCAATGGTTCTTTTTCTGTACAGAGATAGGAAATATCCTAATGGTGAAGGTCTAACCGA  
GCAACCAGACGTGGGTATTGAAAAGCAACAGGAAAGGATCGTAACGTGATATGCAATTCAGGTCAGTTGGAGTGAAGAA  
GACCCTGGTTTTCTACGCAGGCAGAGCTCCTAGTGGTGAGCGGACTGATTGGGTTATGCATGAATACACCTTGGATGAAG  
AGGAGCTTAAGAGATGCCAGGGTGTAAAGGACTATTATGCACTTTACAAGGTTTACAAGAAAAGTGGACCTGGTCTAAA  
AATGGTGAACAGTATGGTGCACCATTTAATGAAGAAGAGTGGGCAGATGATGACATAGTAGATTTAATATTAACCTCAGC  
TGATCAGGAGGCTCCAAATGATGTTGCTGATAATGTTAATGTACCACTGCCTTTTCTTGATGATGAAATCAATAACATCA  
TTAGGAAAATTTGGATGATGAGCTTGCTTAGATCAGCAGCATGTGAATGGCTATCCTGACTTCTCAGGTTGTTAGT  
GAAGAAACACAAAGTACTGTTGTGGATCAGTTCTCTGAGGATGTGATGCTCCCTGAACCAGTCAGAATCTCACATCCTAG  
CTGCCAATTTTTGATGCACAGCCTAGCTTTGACTTCAATCGCCAGTTACATCTCATCTGCATGTTTCTGAAACATCTG  
AGGTCACTTCTGCTTCCAACATTAACAAGGAGCTTGACTTTAATGAGGATGGCTTCTTGAAAATTAATGATCTCATT  
GATACTGAACCTACATTGTCAAATGTTGAAAATCTGTGGAGTACCAGCATTGTAAGATGGGTTAAGTGAACCTGATTT  
GTTCCAAGATGCACAGATGTTTCTCGTGACTTGGGCGCAATTATTCATGAAACAGATTCACATGCATATACAAATGCC  
TTGTCAGCAGCAATATTGAATGTCAAAGTTACCAATTGCTGCCAATCCAGAGGATGCCAATCAAACCTGTTGGTGAATTC  
TGGATGCATGGTGA

>Glyma. 10G197600. 2/Glyma. 10G197600. 3

ATGGCACGCATGGGTCCAGGTTCCGATTCCACCCACCGACGAAGAGCTGGTGGTGTCTACCTCAAGCGCAAGATGAC  
TGAAAACCTCTCCCGCTACGACCACATCGCCGTCGTTGACGTCTACAAGCTCGAGCCCTGGGACCTTCCCTCTCTGTGCA  
AGCTGAAGACGAAGGACTTGGAGTGGTACTTCTTACGCGCGTGGATCGCAAGTACGAAAACGGCTCCAGGACCAACCGC  
GCCACCGAGAGGGCTACTGGAATCAAACCGGGATCGAGCATTTTGTGCATGCAGATTTATTTATGTATTGTGCATCATT

CATGAGATATGTAGTCCTGGCACTGGAACCTTGATTGGAGTGGTATAATTGACAGTGATACTTTGCCATCATTGAACTTTC  
ATTACGGGGAGTGTAGTAGCCATGCTGAGTATTCCAAAGTATTCATCAAGGATCAGGAGCCATTGGCAGACACTTTTGAA  
ATTTCTTGTCCTGAAAATGTCTGGCCTCTTGATATGACTGGGCAACATGGCGTGGGTACAAATTCAGGGGAAGATGGAGA  
CAGTGGTGAGCTGAGCAATATTGGCAATTTTGATCTTTCATCGAATAATATGAATCTGGATCTTTACTGGGATGCCAACG  
AGAATCTCCGATGGATGATGATGGATTTTTGGAATACAATGATATTGCAATTGGGAATGGGGATAATCCTACCGAGGCT  
GATCTTTCTGCAAATGCCATGCTAGATGAGTATGCTGCACTCGCTGATGATGATATTTACAAGTATATATCTTTTGATTC  
TCCTCAGATTCAAGAGAGTGAAAACCTTATTCCCAACCAAGGATCACCTTTCACCCAGCAGAATGTGGAGGGAGAAACCG  
CTGATAGAGCTGTGGTTAGTAATGAGGGTTCTTCAGTGCAGAATACACAGGAGGCAATGCTTGGCATCAGGAAGTACAAA  
TCCACTTGTAA
