# Supplementary material
Source: PubMed Central journal article supplement (PMC5100753)
Supplement: supp_pp.16.01132_PP2016-01132DR2_Supplemental_Material_Table.pdf [file supp_pp.16.01132_PP2016-01132DR2_Supplemental_Material_Table.pdf]

**Table S1. GmNTLs identified and characterized in this study.**

| Name    | Previous names <sup>a</sup> | Previous names <sup>b</sup> | Glyma1.1 ID                         | Glycine max Wm82.a2.v1                  | Domain start | Domain end | Length (a.a) | PFAM domain | Domain name | Predicted by TMHMM Number of predicted TMHs | Predicted by Tmpred Number of predicted TMHs | Number of Alternative Transcripts | Transcript Lack TMH                     |
|---------|-----------------------------|-----------------------------|-------------------------------------|-----------------------------------------|--------------|------------|--------------|-------------|-------------|---------------------------------------------|----------------------------------------------|-----------------------------------|-----------------------------------------|
| GmNTL1  | GmNAC012                    | GmNAC027                    | Glyma02g38710.1                     | Glyma.02G222300.1                       | 21           | 147        | 589          | PF02365     | NAM         | 1                                           | 1                                            | -                                 | -                                       |
| GmNTL2  | GmNAC013                    |                             | Glyma02g40750.1                     | Glyma.02G240500.1                       | 5            | 132        | 643          | PF02365     | NAM         | 2                                           | 2                                            | -                                 | -                                       |
| GmNTL3  | GmNAC021                    | GmNAC025                    | Glyma04g40450.1                     | Glyma.04G226700.1                       | 22           | 148        | 603          | PF02365     | NAM         | 1                                           | 1                                            | -                                 | -                                       |
| GmNTL4  | GmNAC036                    | GmNAC26                     | Glyma06g14290.1                     | Glyma.06G138100.1                       | 22           | 148        | 598          | PF02365     | NAM         | 1                                           | 1                                            | -                                 | -                                       |
| GmNTL5  |                             |                             | Glyma07g05351.1                     | Glyma.07G047900.1                       | 12           | 141        | 497          | PF02365     | NAM         | 1                                           | 1                                            | -                                 | -                                       |
| GmNTL6  |                             |                             | Glyma10g197600.1                    | Glyma.10G197600.1                       | 4            | 111        | 448          | PF02365     | NAM         | 1                                           | 1                                            | 3                                 | Glyma.10G197600.2;<br>Glyma.10G197600.3 |
| GmNTL7  | GmNAC074                    |                             | Glyma10g36360.1                     | Glyma.10G219600.1                       | 20           | 146        | 560          | PF02365     | NAM         | 1                                           | 1                                            | -                                 | -                                       |
| GmNTL8  |                             |                             | Glyma11g33210.1                     | Glyma.11G212400.1                       | 8            | 135        | 672          | PF02365     | NAM         | 0                                           | 2                                            | -                                 | -                                       |
| GmNTL9  |                             |                             | Glyma12g186900.1                    | Glyma.12G186900.1                       | 17           | 144        | 493          | PF02365     | NAM         | 1                                           | 1                                            | -                                 | -                                       |
| GmNTL10 | GmNAC103                    |                             | Glyma13g39090.2                     | Glyma.13G314600.1                       | 18           | 144        | 371          | PF02365     | NAM         | 1                                           | 1                                            | -                                 | -                                       |
| GmNTL11 | GmNAC110                    |                             | Glyma14g36840.1                     | Glyma.14G189300.1                       | 21           | 147        | 590          | PF02365     | NAM         | 1                                           | 1                                            | 2                                 | -                                       |
| GmNTL12 | GmNAC111                    |                             | Glyma14g39080.1                     | Glyma.14G210000.1                       | 5            | 132        | 644          | PF02365     | NAM         | 1                                           | 1                                            | -                                 | -                                       |
| GmNTL13 | GmNAC136                    |                             | Glyma18g05020.1                     | Glyma.18G043900.1                       | 6            | 133        | 678          | PF02365     | NAM         | 2                                           | 2                                            | -                                 | -                                       |
| GmNTL14 | GmNAC149                    |                             | Glyma20g31210.4/<br>Glyma20g31210.1 | Glyma.20G172100.1/<br>Glyma.20G172100.2 | 20           | 146        | 549          | PF02365     | NAM         | 1                                           | 1                                            | 4                                 | Glyma.20G172100.4                       |
| GmNTL15 | GmNAC151                    |                             | Glyma20g33390.1                     | Glyma.20G192300.1                       | 6            | 131        | 604          | PF02365     | NAM         | 1                                           | 1                                            | -                                 | -                                       |

<sup>a</sup>According to Le et al. 2011 (Ref. 30)

<sup>b</sup>According to Tran et al. 2004 (Ref. 53)







**Table S3 Flanking sequences of GmNTL within 140 Kb**

| Gene            | Locus           | Chr     | Start    | Stop                                                 | Function                                                             |
|-----------------|-----------------|---------|----------|------------------------------------------------------|----------------------------------------------------------------------|
| <i>GmNTL1</i>   | Glyma.02G221300 | Chr02   | 40900121 | 40918108                                             | DNA mismatch repair protein MutS, type 2                             |
|                 | Glyma.02G221700 | Chr02   | 40927646 | 40928737                                             | serine protease inhibitor, Kazal-type family protein                 |
|                 | Glyma.02G221900 | Chr02   | 40932876 | 40935807                                             | Concanavalin A-like lectin protein kinase family protein             |
|                 | Glyma.02G222000 | Chr02   | 40953440 | 40959908                                             | nodulin MtN21 /EamA-like transporter family protein                  |
|                 | Glyma.02G222100 | Chr02   | 40962524 | 40968028                                             | nodulin MtN21 /EamA-like transporter family protein                  |
|                 | Glyma.02G222200 | Chr02   | 40976865 | 40982917                                             | Calcium-binding endonuclease/exonuclease/phosphatase                 |
|                 | Glyma.02G222200 | Chr02   | 40976865 | 40982917                                             | Calcium-binding endonuclease/exonuclease/phosphatase                 |
|                 | Glyma.02G222300 | Chr02   | 40991314 | 40995436                                             | NAC transcription factor-like 9                                      |
|                 | Glyma.02G222400 | Chr02   | 40998557 | 41001678                                             | Aldolase superfamily protein                                         |
|                 | Glyma.02G222600 | Chr02   | 41020144 | 41023345                                             | Heavy metal transport/detoxification superfamily protein             |
| <i>GmNTL2</i>   | Glyma.02G222700 | Chr02   | 41029187 | 41031367                                             | Heavy metal transport/detoxification superfamily protein             |
|                 | Glyma.02G222800 | Chr02   | 41032232 | 41033043                                             | Unknown                                                              |
|                 | Glyma.02G240000 | Chr02   | 42859034 | 42866507                                             | polyamine oxidase 4                                                  |
|                 | Glyma.02G240100 | Chr02   | 42866887 | 42869864                                             | AMP-dependent synthetase and ligase family protein                   |
|                 | Glyma.02G240200 | Chr02   | 42872399 | 42878160                                             | PHYTOENE SYNTHASE                                                    |
|                 | Glyma.02G240300 | Chr02   | 42883817 | 42887882                                             | SET domain group 40                                                  |
|                 | Glyma.02G240400 | Chr02   | 42892680 | 42898279                                             | sucrose synthase 6                                                   |
|                 | Glyma.02G240500 | Chr02   | 42900252 | 42904927                                             | NAC domain containing protein 28                                     |
|                 | Glyma.02G240600 | Chr02   | 42908973 | 42910047                                             | glutathione S-transferase TAU 19                                     |
|                 | Glyma.02G240700 | Chr02   | 42910921 | 42918001                                             | autophagy protein Apg5 family                                        |
| <i>GmNTL3</i>   | Glyma.02G240800 | Chr02   | 42920379 | 42922319                                             | Unknown                                                              |
|                 | Glyma.02G240900 | Chr02   | 42923065 | 42925453                                             | expansin A13                                                         |
|                 | Glyma.02G241000 | Chr02   | 42928962 | 42932788                                             | Homeodomain-like superfamily protein                                 |
|                 | Glyma.04G226400 | Chr04   | 49605506 | 49609864                                             | SPFH/Band 7/PHB domain-containing membrane-associated protein family |
|                 | Glyma.04G226500 | Chr04   | 49611490 | 49612657                                             | Ribosomal protein L6 family                                          |
|                 | Glyma.04G226600 | Chr04   | 49617121 | 49622404                                             | IAA-leucine-resistant (ILR1)-like 3                                  |
|                 | Glyma.04G226700 | Chr04   | 49623094 | 49626512                                             | NAC 014                                                              |
|                 | Glyma.04G226800 | Chr04   | 49639118 | 49643847                                             | Calcium-binding endonuclease/exonuclease/phosphatase                 |
|                 | Glyma.04G226900 | Chr04   | 49655093 | 49656271                                             | Ribosomal protein L6 family                                          |
|                 | Glyma.04G227000 | Chr04   | 49667985 | 49672223                                             | Heavy metal transport/detoxification superfamily protein             |
| <i>GmNTL4</i>   | Glyma.04G227100 | Chr04   | 49679446 | 49684761                                             | Unknown                                                              |
|                 | Glyma.04G227200 | Chr04   | 49687315 | 49689108                                             | Peroxidase superfamily protein                                       |
|                 | Glyma.04G227300 | Chr04   | 49689541 | 49691300                                             | nascent polypeptide-associated complex subunit alpha-like protein 2  |
|                 | Glyma.04G227400 | Chr04   | 49692001 | 49694593                                             | nascent polypeptide-associated complex subunit alpha-like protein 2  |
|                 | Glyma.04G227500 | Chr04   | 49695529 | 49696967                                             | Unknown                                                              |
|                 | Glyma.06G137600 | Chr06   | 11250524 | 11251867                                             | Unknown                                                              |
|                 | Glyma.06G137700 | Chr06   | 11252976 | 11255680                                             | nascent polypeptide-associated complex subunit alpha-like protein 2  |
|                 | Glyma.06G137800 | Chr06   | 11256521 | 11258533                                             | nascent polypeptide-associated complex subunit alpha-like protein 2  |
|                 | Glyma.06G137900 | Chr06   | 11258699 | 11260675                                             | Peroxidase superfamily protein                                       |
|                 | Glyma.06G138000 | Chr06   | 11261314 | 11266797                                             | Unknown                                                              |
| <i>GmNTL5</i>   | Glyma.06G138100 | Chr06   | 11272268 | 11275624                                             | NAC transcription factor-like 9                                      |
|                 | Glyma.06G138200 | Chr06   | 11287872 | 11292405                                             | Calcium-binding endonuclease/exonuclease/phosphatase                 |
|                 | Glyma.06G138300 | Chr06   | 11295254 | 11301172                                             | nodulin MtN21 /EamA-like transporter family protein                  |
|                 | Glyma.06G138400 | Chr06   | 11302499 | 11303644                                             | Ribosomal protein L6 family                                          |
|                 | Glyma.06G138500 | Chr06   | 11306829 | 11310909                                             | SPFH/Band 7/PHB domain-containing membrane-associated protein family |
|                 | Glyma.06G138600 | Chr06   | 11318029 | 11319071                                             | Ribosomal protein L6 family                                          |
|                 | Glyma.07G047400 | Chr07   | 3977971  | 3979901                                              | Protein of unknown function (DUF1295)                                |
|                 | Glyma.07G047500 | Chr07   | 3985133  | 3990296                                              | purple acid phosphatase 29                                           |
|                 | Glyma.07G047600 | Chr07   | 3991009  | 3993352                                              | photosystem I light harvesting complex gene 2                        |
|                 | Glyma.07G047700 | Chr07   | 3995501  | 3999612                                              | Ribosomal RNA processing Brix domain protein                         |
| Glyma.07G047800 | Chr07           | 4004367 | 4008503  | Calcium-binding endonuclease/exonuclease/phosphatase |                                                                      |
| <i>GmNTL5</i>   | Glyma.07G047900 | Chr07   | 4016419  | 4019905                                              | NAC domain containing protein 62                                     |

|               |                 |       |          |          |                                                                                 |
|---------------|-----------------|-------|----------|----------|---------------------------------------------------------------------------------|
|               | Glyma.07G048000 | Chr07 | 4026951  | 4029750  | NAC transcription factor-like 9                                                 |
|               | Glyma.07G048100 | Chr07 | 4042093  | 4044551  | NAC transcription factor-like 9                                                 |
|               | Glyma.07G048200 | Chr07 | 4061864  | 4064513  | AP2/B3-like transcriptional factor family protein                               |
|               | Glyma.07G048300 | Chr07 | 4086892  | 4090342  | pyrophosphorylase 1                                                             |
|               | Glyma.07G048400 | Chr07 | 4096301  | 4102195  | Protein kinase superfamily protein                                              |
|               | Glyma.10G067900 | Chr10 | 6697335  | 6700998  | IQ calmodulin-binding motif family protein                                      |
|               | Glyma.10G068900 | Chr10 | 6788893  | 6792760  | vascular plant one zinc finger protein                                          |
|               | Glyma.10G197300 | Chr10 | 42857995 | 42860990 | SKU5 similar 3                                                                  |
|               | Glyma.10G197400 | Chr10 | 42863093 | 42868252 | RAB GTPase homolog C2A                                                          |
|               | Glyma.10G197500 | Chr10 | 42882331 | 42888608 | NAC domain containing protein 52                                                |
| <i>GmNTL6</i> | Glyma.10G197600 | Chr10 | 42899234 | 42904478 | NAC domain containing protein 52                                                |
|               | Glyma.10G197700 | Chr10 | 42905294 | 42911464 | lactate/malate dehydrogenase family protein                                     |
|               | Glyma.10G197800 | Chr10 | 42914376 | 42918603 | OPC-8:0 CoA ligase1                                                             |
|               | Glyma.10G198000 | Chr10 | 42923799 | 42930121 | Galactose oxidase/kelch repeat superfamily protein                              |
|               | Glyma.10G198100 | Chr10 | 42932760 | 42934470 | Peroxidase superfamily protein                                                  |
|               | Glyma.10G219100 | Chr10 | 45096674 | 45100122 | Laccase/Diphenol oxidase family protein                                         |
|               | Glyma.10G219200 | Chr10 | 45102350 | 45106419 | laccase 14                                                                      |
|               | Glyma.10G219300 | Chr10 | 45108514 | 45111450 | Oxidoreductase family protein                                                   |
|               | Glyma.10G219400 | Chr10 | 45112587 | 45115127 | cofactor assembly, complex C (B6F)                                              |
|               | Glyma.10G219500 | Chr10 | 45115436 | 45122237 | cleavage stimulating factor 64                                                  |
| <i>GmNTL7</i> | Glyma.10G219600 | Chr10 | 45126440 | 45130601 | NAC domain containing protein 17                                                |
|               | Glyma.10G219700 | Chr10 | 45134028 | 45138735 | sphingoid base hydroxylase 2                                                    |
|               | Glyma.10G219800 | Chr10 | 45139887 | 45141455 | Peroxidase superfamily protein                                                  |
|               | Glyma.10G219900 | Chr10 | 45144422 | 45147283 | Subunits of heterodimeric actin filament capping protein Capz superfamily       |
|               | Glyma.10G220000 | Chr10 | 45149408 | 45157038 | Pseudouridine synthase family protein                                           |
|               | Glyma.10G220100 | Chr10 | 45160713 | 45166890 | RAB GTPase homolog G3A                                                          |
|               | Glyma.11G211900 | Chr11 | 30435707 | 30438967 | vascular plant one zinc finger protein                                          |
|               | Glyma.11G212000 | Chr11 | 30452236 | 30454838 | cytochrome P450, family 94, subfamily C, polypeptide 1                          |
|               | Glyma.11G212100 | Chr11 | 30470250 | 30473891 | IQ calmodulin-binding motif family protein                                      |
|               | Glyma.11G212200 | Chr11 | 30478174 | 30480634 | Unknown                                                                         |
|               | Glyma.11G212300 | Chr11 | 30507015 | 30517598 | Regulator of chromosome condensation (RCC1) family with FYVE zinc finger domain |
| <i>GmNTL8</i> | Glyma.11G212400 | Chr11 | 30521509 | 30526668 | NAC domain containing protein 28                                                |
|               | Glyma.11G212500 | Chr11 | 30536793 | 30543127 | Unknown                                                                         |
|               | Glyma.11G212600 | Chr11 | 30544163 | 30545905 | Unknown                                                                         |
|               | Glyma.11G212700 | Chr11 | 30547238 | 30552421 | sucrose synthase 6                                                              |
|               | Glyma.11G212800 | Chr11 | 30571422 | 30573995 | LRR and NB-ARC domains-containing disease resistance protein                    |
|               | Glyma.11G212900 | Chr11 | 30575283 | 30577501 | glutathione S-transferase F11                                                   |
|               | Glyma.11G213000 | Chr11 | 30593602 | 30596478 | glutamate decarboxylase                                                         |
|               | Glyma.11G213100 | Chr11 | 30598525 | 30601364 | Concanavalin A-like lectin protein kinase family protein                        |
|               | Glyma.12G186500 | Chr12 | 34725542 | 34726776 | Uncharacterised protein family (UPF0497)                                        |
|               | Glyma.12G186600 | Chr12 | 34727876 | 34733210 | decapping 1                                                                     |
|               | Glyma.12G186700 | Chr12 | 34736246 | 34740450 | Leucine-rich repeat (LRR) family protein                                        |
|               | Glyma.12G186800 | Chr12 | 34749304 | 34751194 | F-box family protein                                                            |
| <i>GmNTL9</i> | Glyma.12G186900 | Chr12 | 34753427 | 34763019 | NTM1-like 8                                                                     |
|               | Glyma.12G187000 | Chr12 | 34770351 | 34771629 | Unknown                                                                         |
|               | Glyma.12G187100 | Chr12 | 34784828 | 34786462 | Unknown                                                                         |
|               | Glyma.12G187200 | Chr12 | 34824285 | 34825948 | Unknown                                                                         |
|               | Glyma.12G187400 | Chr12 | 34850968 | 34852441 | Polynucleotidyl transferase, ribonuclease H-like superfamily protein            |
|               | Glyma.13G152400 | Chr13 | 26701683 | 26706699 | Ankyrin repeat family protein                                                   |
|               | Glyma.13G152500 | Chr13 | 26712715 | 26718689 | UDP-glucose pyrophosphorylase 2                                                 |
|               | Glyma.13G314100 | Chr13 | 40937254 | 40938477 | Polynucleotidyl transferase, ribonuclease H-like superfamily protein            |
|               | Glyma.13G314200 | Chr13 | 40949752 | 40951896 | Unknown                                                                         |
|               | Glyma.13G314300 | Chr13 | 40964940 | 40965184 | Unknown                                                                         |
|               | Glyma.13G314400 | Chr13 | 40977943 | 40978908 | Unknown                                                                         |

|                |                 |       |          |          |                                                                                 |
|----------------|-----------------|-------|----------|----------|---------------------------------------------------------------------------------|
|                | Glyma.13G314500 | Chr13 | 40987411 | 40991169 | Unknown                                                                         |
| <i>GmNTL10</i> | Glyma.13G314600 | Chr13 | 40993081 | 40996703 | NTM1-like 8                                                                     |
|                | Glyma.13G314700 | Chr13 | 40998351 | 40999331 | F-box family protein                                                            |
|                | Glyma.13G314800 | Chr13 | 41004969 | 41008993 | Leucine-rich repeat (LRR) family protein                                        |
|                | Glyma.13G314900 | Chr13 | 41018298 | 41024037 | decapping 1                                                                     |
|                | Glyma.13G315000 | Chr13 | 41028031 | 41029272 | Uncharacterised protein family (UPF0497)                                        |
|                | Glyma.14G188800 | Chr14 | 45344566 | 45346078 | DNA mismatch repair protein MutS, type 2                                        |
|                | Glyma.14G188900 | Chr14 | 45348073 | 45353965 | DNA mismatch repair protein MutS, type 2                                        |
|                | Glyma.14G189000 | Chr14 | 45364719 | 45365712 | serine protease inhibitor, Kazal-type family protein                            |
|                | Glyma.14G189100 | Chr14 | 45369316 | 45371858 | Concanavalin A-like lectin protein kinase family protein                        |
|                | Glyma.14G189200 | Chr14 | 45393981 | 45398605 | nodulin MtN21 /EamA-like transporter family protein                             |
| <i>GmNTL11</i> | Glyma.14G189300 | Chr14 | 45407343 | 45411346 | NAC transcription factor-like 9                                                 |
|                | Glyma.14G189400 | Chr14 | 45416092 | 45419126 | Aldolase superfamily protein                                                    |
|                | Glyma.14G189500 | Chr14 | 45437919 | 45441053 | Heavy metal transport/detoxification superfamily protein                        |
|                | Glyma.14G189600 | Chr14 | 45450173 | 45452630 | Heavy metal transport/detoxification superfamily protein                        |
|                | Glyma.14G189700 | Chr14 | 45453681 | 45453860 | Unknown                                                                         |
|                | Glyma.14G209400 | Chr14 | 47475271 | 47483030 | polyamine oxidase 4                                                             |
|                | Glyma.14G209500 | Chr14 | 47475331 | 47475528 | Unknown                                                                         |
|                | Glyma.14G209600 | Chr14 | 47485565 | 47488948 | AMP-dependent synthetase and ligase family protein                              |
|                | Glyma.14G209700 | Chr14 | 47496019 | 47500526 | PHYTOENE SYNTHASE                                                               |
|                | Glyma.14G209800 | Chr14 | 47508042 | 47511868 | SET domain group 40                                                             |
|                | Glyma.14G209900 | Chr14 | 47515899 | 47521687 | sucrose synthase 6                                                              |
| <i>GmNTL12</i> | Glyma.14G210000 | Chr14 | 47524327 | 47529700 | NAC domain containing protein 28                                                |
|                | Glyma.14G210100 | Chr14 | 47533732 | 47535083 | glutathione S-transferase TAU 19                                                |
|                | Glyma.14G210200 | Chr14 | 47535839 | 47545840 | autophagy protein Apg5 family                                                   |
|                | Glyma.14G210300 | Chr14 | 47537416 | 47537595 | Unknown                                                                         |
|                | Glyma.14G210400 | Chr14 | 47547994 | 47549987 | Unknown                                                                         |
|                | Glyma.14G210500 | Chr14 | 47550799 | 47553102 | expansin A13                                                                    |
|                | Glyma.14G210600 | Chr14 | 47557927 | 47561596 | Homeodomain-like superfamily protein                                            |
|                | Glyma.18G043400 | Chr18 | 3705531  | 3706973  | Pentatricopeptide repeat (PPR) superfamily protein                              |
|                | Glyma.18G043500 | Chr18 | 3711823  | 3713856  | Concanavalin A-like lectin protein kinase family protein                        |
|                | Glyma.18G043600 | Chr18 | 3716146  | 3727012  | glutamate decarboxylase 4                                                       |
|                | Glyma.18G043700 | Chr18 | 3734876  | 3739321  | glutathione S-transferase F11                                                   |
|                | Glyma.18G043800 | Chr18 | 3752591  | 3759239  | Unknown                                                                         |
| <i>GmNTL13</i> | Glyma.18G043900 | Chr18 | 3767587  | 3772179  | NAC domain containing protein 28                                                |
|                | Glyma.18G044000 | Chr18 | 3777421  | 3789101  | Regulator of chromosome condensation (RCC1) family with FYVE zinc finger domain |
|                | Glyma.18G044100 | Chr18 | 3809348  | 3812858  | expansin A13                                                                    |
|                | Glyma.18G044200 | Chr18 | 3813589  | 3817289  | Homeodomain-like superfamily protein                                            |
|                | Glyma.18G044300 | Chr18 | 3820564  | 3825063  | Ankyrin repeat family protein                                                   |
|                | Glyma.18G044400 | Chr18 | 3836270  | 3837813  | UDP-GLUCOSE PYROPHOSPHORYLASE 1                                                 |
|                | Glyma.20G171600 | Chr20 | 40934103 | 40939326 | RAB GTPase homolog G3A                                                          |
|                | Glyma.20G171700 | Chr20 | 40941339 | 40957772 | Pseudouridine synthase family protein                                           |
|                | Glyma.20G171800 | Chr20 | 40959554 | 40962492 | Subunits of heterodimeric actin filament capping protein Capz superfamily       |
|                | Glyma.20G171900 | Chr20 | 40967953 | 40969568 | Peroxidase superfamily protein                                                  |
|                | Glyma.20G172000 | Chr20 | 40972828 | 40977774 | sphingoid base hydroxylase 1                                                    |
| <i>GmNTL14</i> | Glyma.20G172100 | Chr20 | 40983077 | 40987397 | NAC domain containing protein 17                                                |
|                | Glyma.20G172200 | Chr20 | 40991514 | 40998998 | cleavage stimulating factor 64                                                  |
|                | Glyma.20G172300 | Chr20 | 41000197 | 41002424 | cofactor assembly, complex C (B6F)                                              |
|                | Glyma.20G172400 | Chr20 | 41008497 | 41011265 | Oxidoreductase family protein                                                   |
|                | Glyma.20G172500 | Chr20 | 41013531 | 41015300 | cytochrome P450, family 78, subfamily A, polypeptide 7                          |
|                | Glyma.20G172600 | Chr20 | 41019363 | 41023633 | Laccase/Diphenol oxidase family protein                                         |
|                | Glyma.20G172700 | Chr20 | 41025526 | 41028921 | Laccase/Diphenol oxidase family protein                                         |
|                | Glyma.20G191800 | Chr20 | 43061155 | 43062135 | Peroxidase superfamily protein                                                  |
|                | Glyma.20G191900 | Chr20 | 43064269 | 43071245 | Galactose oxidase/kelch repeat superfamily protein                              |
|                | Glyma.20G192100 | Chr20 | 43072402 | 43078719 | OPC-8:0 CoA ligase1                                                             |
|                | Glyma.20G192200 | Chr20 | 43084747 | 43090392 | lactate/malate dehydrogenase family protein                                     |
| <i>GmNTL15</i> | Glyma.20G192300 | Chr20 | 43096801 | 43100393 | NAC domain containing protein 50                                                |

|                 |                 |       |          |          |                                                      |
|-----------------|-----------------|-------|----------|----------|------------------------------------------------------|
|                 | Glyma.20G192500 | Chr20 | 43138131 | 43145708 | NAC domain containing protein 50                     |
|                 | Glyma.20G192600 | Chr20 | 43158672 | 43164035 | RAB GTPase homolog C2A                               |
|                 | Glyma.20G192700 | Chr20 | 43171939 | 43184282 | cycloartenol synthase 1                              |
|                 | Glyma.20G192800 | Chr20 | 43186683 | 43190491 | Cupredoxin superfamily protein                       |
|                 | Glyma.16G015900 | Chr16 | 1391279  | 1393670  | Protein of unknown function (DUF1295)                |
|                 | Glyma.16G016000 | Chr16 | 1400064  | 1404488  | SF0 - PHOSPHATASE DCR2-RELATED                       |
|                 | Glyma.16G016100 | Chr16 | 1404906  | 1407307  | photosystem I light harvesting complex gene 2        |
|                 | Glyma.16G016200 | Chr16 | 1409241  | 1413726  | Ribosomal RNA processing Brix domain protein         |
|                 | Glyma.16G016300 | Chr16 | 1422524  | 1426370  | Calcium-binding endonuclease/exonuclease/phosphatase |
| <i>Glyma.16</i> | Glyma.16G016400 | Chr16 | 1431637  | 1433520  | NAC domain containing protein 62                     |
| <i>G016400</i>  | Glyma.16G016500 | Chr16 | 1440846  | 1441640  | DENTIN SIALOPHOSPHOPROTEIN-LIKE PROTEIN              |
|                 | Glyma.16G016600 | Chr16 | 1450709  | 1455979  | NAC transcription factor-like 9                      |
|                 | Glyma.16G016700 | Chr16 | 1460102  | 1463552  | NAC transcription factor-like 9                      |
|                 | Glyma.16G016800 | Chr16 | 1467805  | 1469620  | unknown protein                                      |
|                 | Glyma.16G016900 | Chr16 | 1481288  | 1483272  | unknown protein                                      |
|                 | Glyma.16G017100 | Chr16 | 1483694  | 1486538  | AP2/B3-like transcriptional factor family protein    |
|                 | Glyma.16G017200 | Chr16 | 1512023  | 1514299  | pyrophosphorylase 1                                  |
|                 | Glyma.16G017300 | Chr16 | 1519674  | 1525290  | Protein kinase superfamily protein                   |

---

**Table S4 Stress related cis-acting regulatory elements in GmNTL promoters.**

| Pair No. | Name   | Site Name       | Organism              | Position | Strand | Matrix score. | sequence    | function                                                            | Name    | Site Name       | Organism              | Position | Strand | Matrix score. | sequence    | function                                                            |  |  |
|----------|--------|-----------------|-----------------------|----------|--------|---------------|-------------|---------------------------------------------------------------------|---------|-----------------|-----------------------|----------|--------|---------------|-------------|---------------------------------------------------------------------|--|--|
| I        | GmNTL1 | ARE             | Zea mays              | 195      | -      | 6             | TGGTTT      | cis-acting regulatory element essential for the anaerobic induction | GmNTL11 | ARE             | Zea mays              | 214      | -      | 6             | TGGTTT      | cis-acting regulatory element essential for the anaerobic induction |  |  |
|          |        | ERE             | Dianthus caryophyllus | 263      | +      | 8             | ATTTCAAA    | ethylene-responsive element                                         |         | ABRE            | Arabidopsis thaliana  | 348      | -      | 6             | TACGTG      | cis-acting element involved in the abscisic acid responsiveness     |  |  |
|          |        | TC-rich repeats | Nicotiana tabacum     | 347      | -      | 9             | ATTTTC TTCA | cis-acting element involved in defense and stress responsiveness    |         | HSE             | Brassica oleracea     | 543      | -      | 9             | AGAAAAT TCG | cis-acting element involved in heat stress responsiveness           |  |  |
|          |        | TCA-element     | Brassica oleracea     | 836      | +      | 9             | GAGAAG AATA | cis-acting element involved in salicylic acid responsiveness        |         | TC-rich repeats | Nicotiana tabacum     | 546      | +      | 9             | ATTTTCT TCA | cis-acting element involved in defense and stress responsiveness    |  |  |
|          |        | ABRE            | Arabidopsis thaliana  | 1050     | -      | 7             | ACGTGG C    | cis-acting element involved in the abscisic acid responsiveness     |         | ERE             | Dianthus caryophyllus | 608      | +      | 8             | ATTTCAA A   | ethylene-responsive element                                         |  |  |
|          |        | ABRE            | Arabidopsis thaliana  | 1052     | +      | 6             | CACGTG      | cis-acting element involved in the abscisic acid responsiveness     |         | TCA-element     | Nicotiana tabacum     | 817      | -      | 9             | CCATCTT TTT | cis-acting element involved in salicylic acid responsiveness        |  |  |
|          |        | CGTCA-motif     | Hordeum vulgARE       | 1340     | -      | 5             | CGTCA       | cis-acting regulatory element involved in the MeJA-responsiveness   |         | ABRE            | Arabidopsis thaliana  | 1077     | -      | 7             | ACGTGGC     | cis-acting element involved in the abscisic acid responsiveness     |  |  |
|          |        | TGACG-motif     | Hordeum vulgARE       | 1340     | +      | 5             | TGACG       | cis-acting regulatory element involved in the MeJA-responsiveness   |         | ABRE            | Arabidopsis thaliana  | 1079     | +      | 6             | CACGTG      | cis-acting element involved in the abscisic acid responsiveness     |  |  |
|          |        | TCA-element     | Brassica oleracea     | 1417     | -      | 9             | GAGAAG AATA | cis-acting element involved in salicylic acid responsiveness        |         | CGTCA-motif     | Hordeum vulgARE       | 1343     | -      | 5             | CGTCA       | cis-acting regulatory element involved in the MeJA-responsiveness   |  |  |
| II       | GmNTL3 | HSE             | Brassica oleracea     | 27       | +      | 9             | AAAAAA TTTC | cis-acting element involved in heat stress responsiveness           | GmNTL4  | ABRE            | Arabidopsis thaliana  | 248      | -      | 6             | TACGTG      | cis-acting element involved in the abscisic acid responsiveness     |  |  |
|          |        | MBS             | Arabidopsis thaliana  | 78       | -      | 6             | TAACGTG     | MYB binding site involved in drought-inducibility                   |         | TCA-element     | Brassica oleracea     | 296      | +      | 9             | CAGAAAA GGA | cis-acting element involved in salicylic acid responsiveness        |  |  |
|          |        | TCA-element     | Brassica oleracea     | 145      | +      | 9             | CAGAAA AGGA | cis-acting element involved in salicylic acid responsiveness        |         | HSE             | Brassica oleracea     | 548      | +      | 9             | AGAAAAT TCG | cis-acting element involved in heat stress responsiveness           |  |  |
|          |        | ABRE            | Arabidopsis thaliana  | 727      | +      | 6             | TACGTG      | cis-acting element involved in the abscisic acid responsiveness     |         | TC-rich repeats | Nicotiana tabacum     | 911      | -      | 9             | GTTTTCT TAC | cis-acting element involved in defense and stress responsiveness    |  |  |
|          |        | HSE             | Brassica oleracea     | 869      | -      | 9             | AAAAAA TTTC | cis-acting element involved in heat stress responsiveness           |         | TC-rich repeats | Nicotiana tabacum     | 945      | +      | 9             | ATTCTCT AAC | cis-acting element involved in defense and stress responsiveness    |  |  |
|          |        | TC-rich repeats | Nicotiana tabacum     | 943      | +      | 9             | ATTTTC TTCA | cis-acting element involved in defense and stress responsiveness    |         | ARE             | Zea mays              | 1003     | +      | 6             | TGGTTT      | cis-acting regulatory element essential for the anaerobic induction |  |  |
|          |        | TCA-element     | Brassica oleracea     | 944      | -      | 9             | GAGAAG AATA | cis-acting element involved in salicylic acid responsiveness        |         | TC-rich repeats | Nicotiana tabacum     | 1005     | +      | 10            | GTTTTCT TAC | cis-acting element involved in defense and stress responsiveness    |  |  |
|          |        | TC-rich repeats | Nicotiana tabacum     | 984      | +      | 10            | GTTTTC TTAC | cis-acting element involved in defense and stress responsiveness    |         | CGTCA-motif     | Hordeum vulgARE       | 1021     | +      | 5             | CGTCA       | cis-acting regulatory element involved in the MeJA-responsiveness   |  |  |
|          |        | ABRE            | Arabidopsis thaliana  | 998      | -      | 6             | TACGTG      | cis-acting element involved in the abscisic acid responsiveness     |         | TGACG-motif     | Hordeum vulgARE       | 1021     | -      | 5             | TGACG       | cis-acting regulatory element involved in the MeJA-responsiveness   |  |  |
|          |        | CGTCA-motif     | Hordeum vulgARE       | 1029     | -      | 5             | CGTCA       | cis-acting regulatory element involved in the MeJA-responsiveness   |         | MBS             | Arabidopsis thaliana  | 1044     | +      | 6             | CAACTG      | MYB binding site involved in drought-inducibility                   |  |  |
|          |        | TGACG-motif     | Hordeum vulgARE       | 1029     | +      | 5             | TGACG       | cis-acting regulatory element involved in the MeJA-responsiveness   |         | ABRE            | Hordeum vulgARE       | 1054     | +      | 9             | CGCACGT GTC | cis-acting element involved in the abscisic acid responsiveness     |  |  |
|          |        | ABRE            | Arabidopsis thaliana  | 1033     | -      | 7             | ACGTGG C    | cis-acting element involved in the abscisic acid responsiveness     |         | ABRE            | Arabidopsis thaliana  | 1056     | +      | 6             | CACGTG      | cis-acting element involved in the abscisic acid responsiveness     |  |  |
|          |        | ABRE            | Arabidopsis thaliana  | 1035     | +      | 6             | CACGTG      | cis-acting element involved in the abscisic acid responsiveness     |         | ARE             | Zea mays              | 1486     | +      | 6             | TGGTTT      | cis-acting regulatory element essential for the anaerobic induction |  |  |
|          |        | MBS             | Zea mays              | 1162     | -      | 6             | CGGTCA      | MYB Binding Site                                                    |         |                 |                       |          |        |               |             |                                                                     |  |  |
|          |        | ABRE            | Arabidopsis thaliana  | 1163     | -      | 7             | TACGGT C    | cis-acting element involved in the abscisic acid responsiveness     |         |                 |                       |          |        |               |             |                                                                     |  |  |
|          |        | HSE             | Brassica oleracea     | 1335     | +      | 9             | AGAAAAT TCG | cis-acting element involved in heat stress responsiveness           |         |                 |                       |          |        |               |             |                                                                     |  |  |
| III      | GmNTL2 | TCA-element     | Nicotiana tabacum     | 53       | -      | 9             | CCATCT TTTT | cis-acting element involved in salicylic acid responsiveness        | GmNTL12 | HSE             | Brassica oleracea     | 146      | +      | 9             | AAAAAAT TTC | cis-acting element involved in heat stress responsiveness           |  |  |
|          |        | ABRE            | Arabidopsis thaliana  | 144      | -      | 7             | ACGTGG C    | cis-acting element involved in the abscisic acid responsiveness     |         | MBS             | Arabidopsis thaliana  | 239      | -      | 6             | TAACGTG     | MYB binding site involved in drought-inducibility                   |  |  |
|          |        | ABRE            | Arabidopsis thaliana  | 146      | +      | 6             | CACGTG      | cis-acting element involved in the abscisic acid responsiveness     |         | HSE             | Brassica oleracea     | 284      | +      | 10            | AAAAAAT TTC | cis-acting element involved in heat stress responsiveness           |  |  |







|                 |                      |      |   |   |             |                                                                     |
|-----------------|----------------------|------|---|---|-------------|---------------------------------------------------------------------|
| TCA-element     | Brassica oleracea    | 928  | - | 9 | GAGAAG AATA | cis-acting element involved in salicylic acid responsiveness        |
| ARE             | Zea mays             | 1042 | + | 6 | TGGTTT      | cis-acting regulatory element essential for the anaerobic induction |
| TC-rich repeats | Nicotiana tabacum    | 1188 | + | 9 | ATTTTC TCCA | cis-acting element involved in defense and stress responsiveness    |
| MBS             | Arabidopsis thaliana | 1476 | - | 6 | TAACTG      | MYB binding site involved in drought-inducibility                   |
| MBS             | Arabidopsis thaliana | 1480 | + | 6 | TAACTG      | MYB binding site involved in drought-inducibility                   |

**Table S5. Functions of NTLs in *A.thaliana***

| Name          | AGI       | Function                                                 | Refs    |
|---------------|-----------|----------------------------------------------------------|---------|
| NTM1          | At4g01540 | Cytokinin signaling                                      | (1)     |
| NTM2          | At4g01550 | Seed germination under high salinity, auxin signaling    | (2,3)   |
| NTL1(ANAC013) | At1g32870 | UV response, oxidative stress response                   | (4,5)   |
| NTL4          | At3g10500 | ROS - mediated PCD                                       | (6)     |
| NTL6          | At3g49530 | Cold - induced pathogenesis, ABA signaling               | (7-9)   |
| NTL7(ANAC017) | At1g34190 | H <sub>2</sub> O <sub>2</sub> -mediated stress signaling | (10)    |
| NTL8          | At2g27300 | Salt signaling in seed germination and floral transition | (11-14) |
| NTL9          | At4g35580 | Osmotic regulation of leaf senescence, plant immunity    | (15,16) |
| ANAC089       | At5g22290 | Sugar signaling, ROS signaling, floral transition        | (17-19) |

- Kim, Y.S., Kim, S.G., Park, J.E., Park, H.Y., Lim, M.H., Chua, N.H. and Park, C.M. (2006) A membrane-bound NAC transcription factor regulates cell division in Arabidopsis. *Plant Cell*, **18**, 3132-3144.
- Park, J., Kim, Y.S., Kim, S.G., Jung, J.H., Woo, J.C. and Park, C.M. (2011) Integration of auxin and salt signals by the NAC transcription factor NTM2 during seed germination in Arabidopsis. *Plant Physiol*, **156**, 537-549.
- Jung, J.H. and Park, C.M. (2011) Auxin modulation of salt stress signaling in Arabidopsis seed germination. *Plant Signal Behav*, **6**, 1198-1200.
- De Clercq, I., Vermeirssen, V., Van Aken, O., Vandepoele, K., Murcha, M.W., Law, S.R., Inze, A., Ng, S., Ivanova, A., Rombaut, D. *et al.* (2013) The Membrane-Bound NAC Transcription Factor ANAC013 Functions in Mitochondrial Retrograde Regulation of the Oxidative Stress Response in Arabidopsis. *Plant Cell*, **25**, 3472-3490.
- Safrany, J., Haasz, V., Mate, Z., Ciolfi, A., Feher, B., Oravec, A., Stec, A., Dallmann, G., Morelli, G., Ulm, R. *et al.* (2008) Identification of a novel cis-regulatory element for UV-B-induced transcription in Arabidopsis. *Plant J*, **54**, 402-414.
- Lee, S., Seo, P.J., Lee, H.J. and Park, C.M. (2012) A NAC transcription factor NTL4 promotes reactive oxygen species production during drought-induced leaf senescence in Arabidopsis. *Plant J*, **70**, 831-844.
- Kim, M.J., Park, M.J., Seo, P.J., Song, J.S., Kim, H.J. and Park, C.M. (2012) Controlled nuclear import of the transcription factor NTL6 reveals a cytoplasmic role of SnRK2.8 in the drought-stress response. *Biochem J*, **448**, 353-363.
- Seo, P.J. and Park, C.M. (2010) A membrane-bound NAC transcription factor as an integrator of biotic and abiotic stress signals. *Plant Signal Behav*, **5**, 481-483.
- Seo, P.J., Kim, M.J., Park, J.Y., Kim, S.Y., Jeon, J., Lee, Y.H., Kim, J. and Park, C.M. (2010) Cold activation of a plasma membrane-tethered NAC transcription factor induces a pathogen resistance response in Arabidopsis. *Plant J*, **61**, 661-671.
- Ng, S., Ivanova, A., Duncan, O., Law, S.R., Van Aken, O., De Clercq, I., Wang, Y., Carrie, C., Xu, L., Kmiec, B. *et al.* (2013) A Membrane-Bound NAC Transcription Factor, ANAC017, Mediates Mitochondrial Retrograde Signaling in Arabidopsis. *Plant Cell*, **25**, 3450-3471.
- Kim, S.G. and Park, C.M. (2008) Gibberellic acid-mediated salt signaling in seed germination. *Plant Signal Behav*, **3**, 877-879.

12. Kim, S.G., Lee, A.K., Yoon, H.K. and Park, C.M. (2008) A membrane-bound NAC transcription factor NTL8 regulates gibberellic acid-mediated salt signaling in Arabidopsis seed germination. *Plant J*, **55**, 77-88.
13. Kim, S.G. and Park, C.M. (2007) Membrane-mediated salt stress signaling in flowering time control. *Plant Signal Behav*, **2**, 517-518.
14. Kim, S.G., Kim, S.Y. and Park, C.M. (2007) A membrane-associated NAC transcription factor regulates salt-responsive flowering via FLOWERING LOCUS T in Arabidopsis. *Planta*, **226**, 647-654.
15. Block, A., Toruno, T.Y., Elowsky, C.G., Zhang, C., Steinbrenner, J., Beynon, J. and Alfano, J.R. (2014) The *Pseudomonas syringae* type III effector HopD1 suppresses effector-triggered immunity, localizes to the endoplasmic reticulum, and targets the Arabidopsis transcription factor NTL9. *New Phytol*, **201**, 1358-1370.
16. Yoon, H.K., Kim, S.G., Kim, S.Y. and Park, C.M. (2008) Regulation of leaf senescence by NTL9-mediated osmotic stress signaling in Arabidopsis. *Mol Cells*, **25**, 438-445.
17. Klein, P., Seidel, T., Stocker, B. and Dietz, K.J. (2012) The membrane-tethered transcription factor ANAC089 serves as redox-dependent suppressor of stromal ascorbate peroxidase gene expression. *Frontiers in plant science*, **3**, 247.
18. Li, P., Wind, J.J., Shi, X., Zhang, H., Hanson, J., Smeekens, S.C. and Teng, S. (2011) Fructose sensitivity is suppressed in Arabidopsis by the transcription factor ANAC089 lacking the membrane-bound domain. *Proc Natl Acad Sci U S A*, **108**, 3436-3441.
19. Li, J., Zhang, J., Wang, X. and Chen, J. (2010) A membrane-tethered transcription factor ANAC089 negatively regulates floral initiation in Arabidopsis thaliana. *Sci China Life Sci*, **53**, 1299-1306.



**Table S6 Sequences of primer pairs used for the isolation of GmNTL genes.**

| Name                                                        | Forward primer                                    | Reverse primer                                       |
|-------------------------------------------------------------|---------------------------------------------------|------------------------------------------------------|
| <i>GmNTL1</i>                                               | 5'-AAAAAGCAGGCTCG<br>ATGGGTGCCGTCGTC-3'           | 5'-AGAAAGCTGGGTT<br>TTAAGATCTGACATATGCCCA-3'         |
| <i>GmNTL2</i>                                               | 5'-AAAAAGCAGGCTCG<br>ATGGCACCTGTTTTGCCT-3'        | 5'-AGAAAGCTGGGTT<br>TCAAGGGTTAACTACCATATTCTG<br>-3'  |
| <i>GmNTL3</i>                                               | 5'-AAAAAGCAGGCTCG<br>ATGGTTTCGGTGGACTG-3'         | 5'-AGAAAGCTGGGTT<br>TTAAAATTTAAGATATCCCCAAA-<br>3'   |
| <i>GmNTL4</i>                                               | 5'-AAAAAGCAGGCTCG<br>ATGGTTTCGGTGGACTGT-3'        | 5'-AGAAAGCTGGGTT<br>TTAAAATTTAAGATATCCCCAGAT<br>-3'  |
| <i>GmNTL5</i>                                               | 5'-AAAAAGCAGGCTCA<br>ATGGAGAACAACATAATTTTC<br>-3' | 5'-AGAAAGCTGGGTT<br>CTAACATGATAATACATCCCAAC-<br>3'   |
| <i>GmNTL6 (Glyma.10g197600.1)</i>                           | 5'-AAAAAGCAGGCTCA<br>ATGGCACGCATGG-3'             | 5'-AGAAAGCTGGGTT<br>CTATCTGTAGGCAATGATGCTT -3'       |
| <i>GmNTL7</i>                                               | 5'-AAAAAGCAGGCTCG<br>ATGGGTGAGGCTTCAGG-3'         | 5'-AGAAAGCTGGGTT<br>TCAAGGAGAGACACATCTCC-3'          |
| <i>GmNTL8</i>                                               | 5'-AAAAAGCAGGCTTA<br>ATGAATATGGCTCCTGTTTC-<br>3'  | 5'-AGAAAGCTGGGTT<br>GGTACAAAGAGCCTATGATATG-3'        |
| <i>GmNTL9</i>                                               | 5'-AAAAAGCAGGCTCG<br>ATGGAAGGGGTTTCGAGG-3'        | 5'-AGAAAGCTGGGTT<br>CTAAAAACTAAAAAATAACAA<br>GAT-3'  |
| <i>GmNTL10</i>                                              | 5'-AAAAAGCAGGCTCG<br>ATGATGGAAGGGGTTTC-3'         | 5'-AGAAAGCTGGG<br>GTTTAATCCTCTAAAATTTGCTGT<br>-3'    |
| <i>GmNTL11 (Glyma.14g36840.1)</i>                           | 5'-AAAAAGCAGGCTCG<br>ATGGGTGCTGTTGTG -3'          | 5'-AGAAAGCTGGGTC<br>TTAAGATCTGACATATGC-3'            |
| <i>GmNTL12</i>                                              | 5'-AAAAAGCAGGCTCG<br>ATGGCACCTGTTTTGCCT-3'        | 5'-AGAAAGCTGGGTT<br>TCAAGGGTTAACTATCATATTCTG<br>-3'  |
| <i>GmNTL13</i>                                              | 5'-AAAAAGCAGGCTCG<br>ATGGCTCCTGTTTCATTG -3'       | 5'-AGAAAGCTGGGTT<br>CTAAGAGTCAACTATAACATGGT<br>TA-3' |
| <i>GmNTL14<br/>(Glyma.20g31210.4/Glyma.20g312<br/>10.1)</i> | 5'-AAAAAGCAGGCTCG<br>ATGGGTGAGGCTTCGG-3'          | 5'-AGAAAGCTGGGTT<br>TCAAGGAGAAATACTTCTACCTA<br>C-3'  |
| <i>GmNTL15</i>                                              | 5'-AAAAAGCAGGCTCG<br>ATGGCACGGATGGGC-3'           | 5'-AGAAAGCTGGGTT<br>TCATTTACCAGTATACATGATGCT-        |

|                                            |                               |                                       |
|--------------------------------------------|-------------------------------|---------------------------------------|
|                                            |                               | 3'                                    |
| <i>GmNTL1-ΔC</i>                           | 5'-ATGGGTGCCGTCGTCGAG<br>T-3' | 5'-<br>GCCATCGTGTCCATGTTTGGC-3'       |
| <i>Glyma.20G172100.4</i>                   | 5'-CAAGACTCTCTCTCGC<br>TC-3'  | 5'- CTTGAAACTGGCTCGGTTCT-3'           |
| <i>Glyma.10g197600.2/Glyma.10g197600.3</i> | 5'-CTCCACACTCTCCATT<br>-3'    | 5'-<br>ACAGGTAGTCATTACCAGTATA<br>C-3' |

**Table S7 Sequences of primer pairs used for qRT-PCR analysis.**

| Name                                                               | Forward primer                    | Reverse primer                  |
|--------------------------------------------------------------------|-----------------------------------|---------------------------------|
| <i>GmNTL1</i>                                                      | 5'-GCCGTTAGGGTCCGTTTC-3'          | 5'-AAGGCTCCCATTTGCAGACA-3'      |
| <i>GmNTL2</i>                                                      | 5'-TTCAGATTCCACCCTACAGACG-3'      | 5'-GATTTCCCTGGCAAGTCCC-3'       |
| <i>GmNTL3</i>                                                      | 5'-CTGAGGAAGAAGTTGGAGGGTC-3'      | 5'-CTGAATGAATGATTTGGCTGGTA-3'   |
| <i>GmNTL4</i>                                                      | 5'-GCCGTTAGGGTCCGTTTC-3'          | 5'-GCTCCTCAAAGTGGGACGATA-3'     |
| <i>GmNTL5</i>                                                      | 5'-GTCTCTAATCTGAATGAAC-3'         | 5'-ATCTGGAATGATACTCTC-3'        |
| <i>GmNTL6</i><br>(compatible for all the alternative transcripts)  | 5'-GATTGCTCTTGGACTTCA-3'          | 5'-AGTAATGTCTGTTATGCTGAT-3'     |
| <i>GmNTL7</i>                                                      | 5'-GGAAAGCAACGGGAAAGGAT-3'        | 5'-CCAATCAGTCCGCTCACCAC-3'      |
| <i>GmNTL8</i>                                                      | 5'-CAATATGTGCGGAGGAAG-3'          | 5'-GTGATGATGAGTAGTTGGATT-3'     |
| <i>GmNTL9</i>                                                      | 5'-CGCCAGAATAACCATTAG-3'          | 5'-TGTTGGAAGATTGGAGAT-3'        |
| <i>GmNTL10</i>                                                     | 5'-ACATAAGGAGGCATCGTGAGGT-3'      | 5'-ATGTGTAGCCATTGACAAACGAA-3'   |
| <i>GmNTL11</i><br>( <i>Glyma.14g36840.1</i> )                      | 5'-GCCGTTAGGGTCCGTTTC-3'          | 5'-AAGGCTCCCATTTGCAGACA-3'      |
| <i>GmNTL12</i>                                                     | 5'-GATCTCTATAAGTGTGAACCGTGGG-3'   | 5'-CGAGGGCTAAAGAAATACCACTCC-3'  |
| <i>GmNTL13</i>                                                     | 5'-CTCAGAAGGAAGAGGTGAAGTTTATAG-3' | 5'-TGTGACCATGTCCCAATGTTATTAT-3' |
| <i>GmNTL14</i><br>(compatible for all the alternative transcripts) | 5'-TGAGCGGACTGATTGGGTTAT-3'       | 5'-CATCTGCCCACTCTTCTTCATT-3'    |
| <i>GmNTL15</i>                                                     | 5'-AGAAGGAGTGGGATGTTGAGG-3'       | 5'-ATGTCAAGGTCGTTGGTTTCA-3'     |

|                             |                                 |                                |
|-----------------------------|---------------------------------|--------------------------------|
| <i>GmTUB</i>                | 5'-GGCAAGATGAGCACCAAGGAA-3'     | 5'-GTGGAGGACATGGACAAACCC-3'    |
| <i>Gm60S</i>                | 5'-AAAGTGGACCAAGGCATATCGTTCG-3' | 5'-TCAGGACATTCTCCGCAAGATTCC-3' |
| <i>GmELF1b</i>              | 5'-GTTGAAAAGCCAGGGGACA-3'       | 5'-TCTTACCCCTTGAGCGTGG-3'      |
| <i>Glyma.10g197600.2</i>    | 5'-TAAGCAGCAGTCAGTGAA-3'        | 5'-CGTATGGTTATTCTCCTTACAA-3'   |
| <i>Glyma.10g197600.3</i>    | 5'-TCTTCATCGTAACTTATACAACA-3'   | 5'-ATGGACAGCCTCTATCAG-3'       |
| <i>Glyma.20G172100.4</i>    | 5'-AGGTATAGTAATCAGCACAA-3'      | 5'-GTCATTCAGGAGCAGTAA-3'       |
| <i>Medtr5g069030</i>        | 5'-TGATGACACTGGTATAAG-3'        | 5'-ATCCTCCTAATCGTATTC-3'       |
| <i>Medtr3g093050</i>        | 5'-TTACAGTATCCACATCAC -3'       | 5'-CATCATATCCATCGCTAT-3'       |
| <i>Medtr5g076850</i>        | 5'-GCACTAACTACAATCACA -3'       | 5'- ATCCTCCTAATCGTATTC-3'      |
| <i>Medtr3g064580</i>        | 5'- GCTATGAAGTTGTTGAGGAA-3'     | 5'-CAGAATTGGATTGAGTTGAAC -3'   |
| <i>Medtr1g097300</i>        | 5'-AAGGTTATGATGGTTCTT -3'       | 5'-AGGAGTAGTAGGTATTGA -3'      |
| <i>Medtr2g086880</i>        | 5'-ATCATTCAATCAGATAACG -3'      | 5'-TTCCAATAGCCACAATCG -3'      |
| <i>Medtr1g090723</i>        | 5'-TCAGCATTACAGACATTAC -3'      | 5'-TTAACATCAGTTTGGGAAA -3'     |
| <i>Medtr4g055270(60S)</i>   | 5'-AATCTCACCACGCTATCA -3'       | 5'-AATCTCACCACGCTATCA-3'       |
| <i>Medtr5g088660(ELF1b)</i> | 5'-GATAAGAAGGCAGCAGAG -3'       | 5'-TCAAGCAGAATGGAAGAC -3'      |
| <i>Medtr7g026230(ACT)</i>   | 5'-CACATACAACCTCCATCAT -3'      | 5'-TTCCTTGCTCATTCTATC-3'       |

**Table S8 Sequences of primer pairs used for the semi-quantitative RT-PCR of GmNTL genes.**

| Name             | Forward primer              | Reverse primer               |
|------------------|-----------------------------|------------------------------|
| <i>GmNTL1-ΔC</i> | 5'-TCGAGTGTACCCACAGCCGC-3'  | 5'-CAAGGCTCCCATTTGCAGACAT-3' |
| <i>GmNTL1</i>    | 5'- GTTAATTGGGATGCGTTCTC-3' | 5'- CAGCATGGTTTTCTGATTCTG-3' |
| <i>GmNTL14</i>   | 5'- ACTGTTGTGGATCAGTTCTC-3' | 5'- GCTGATTACTTTCACCATGC-3'  |
| <i>GmNTL7</i>    | 5'- AGCATGTGAATGGTTATCCT-3' | 5'- GAGAAAGAATCAACAAAGCCT-3' |
